# Supplementary material for: Clinical characteristics of hospitalised patients with COVID-19 and the impact on mortality: a single-network, retrospective cohort study from Pennsylvania state
Source: PubMed Central journal article supplement — BMJ Open. 2021 Apr 8;11(4):e042549. doi: 10.1136/bmjopen-2020-042549 (PMC8039219; doi:10.1136/bmjopen-2020-042549), 2021-04-08
Supplement: bmjopen-2020-042549.draft_revisions.pdf [file bmjopen-2020-042549.draft_revisions.pdf]

# BMJ Open

BMJ Open is committed to open peer review. As part of this commitment we make the peer review history of every article we publish publicly available.

When an article is published we post the peer reviewers' comments and the authors' responses online. We also post the versions of the paper that were used during peer review. These are the versions that the peer review comments apply to.

The versions of the paper that follow are the versions that were submitted during the peer review process. They are not the versions of record or the final published versions. They should not be cited or distributed as the published version of this manuscript.

BMJ Open is an open access journal and the full, final, typeset and author-corrected version of record of the manuscript is available on our site with no access controls, subscription charges or pay-per-view fees (<http://bmjopen.bmj.com>).

If you have any questions on BMJ Open's open peer review process please email [info.bmjopen@bmj.com](mailto:info.bmjopen@bmj.com)

# BMJ Open

## Clinical Characteristics of Hospitalized COVID-19 Patients and the Impact on Mortality: A Single-network, Retrospective Cohort Study from Pennsylvania State

|                               |                                                                                                                                                                                                                                                                                     |
|-------------------------------|-------------------------------------------------------------------------------------------------------------------------------------------------------------------------------------------------------------------------------------------------------------------------------------|
| Journal:                      | <i>BMJ Open</i>                                                                                                                                                                                                                                                                     |
| Manuscript ID                 | bmjopen-2020-042549                                                                                                                                                                                                                                                                 |
| Article Type:                 | Original research                                                                                                                                                                                                                                                                   |
| Date Submitted by the Author: | 08-Jul-2020                                                                                                                                                                                                                                                                         |
| Complete List of Authors:     | Gadhiya, Kinjal; UPMC Pinnacle, Department of Internal Medicine<br>Hansrivijit, Panupong ; UPMC Pinnacle, Department of Internal Medicine<br>Gangireddy, Mounika; UPMC Pinnacle, Department of Internal Medicine<br>Goldman, John; UPMC Pinnacle, Department of Infectious Diseases |
| Keywords:                     | Adult intensive & critical care < INTENSIVE & CRITICAL CARE, INTERNAL MEDICINE, MICROBIOLOGY                                                                                                                                                                                        |
|                               |                                                                                                                                                                                                                                                                                     |

SCHOLARONE™  
Manuscripts

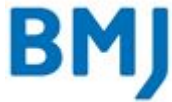

I, the Submitting Author has the right to grant and does grant on behalf of all authors of the Work (as defined in the below author licence), an exclusive licence and/or a non-exclusive licence for contributions from authors who are: i) UK Crown employees; ii) where BMJ has agreed a CC-BY licence shall apply, and/or iii) in accordance with the terms applicable for US Federal Government officers or employees acting as part of their official duties; on a worldwide, perpetual, irrevocable, royalty-free basis to BMJ Publishing Group Ltd ("BMJ") its licensees and where the relevant Journal is co-owned by BMJ to the co-owners of the Journal, to publish the Work in this journal and any other BMJ products and to exploit all rights, as set out in our [licence](#).

The Submitting Author accepts and understands that any supply made under these terms is made by BMJ to the Submitting Author unless you are acting as an employee on behalf of your employer or a postgraduate student of an affiliated institution which is paying any applicable article publishing charge ("APC") for Open Access articles. Where the Submitting Author wishes to make the Work available on an Open Access basis (and intends to pay the relevant APC), the terms of reuse of such Open Access shall be governed by a Creative Commons licence – details of these licences and which [Creative Commons](#) licence will apply to this Work are set out in our licence referred to above.

Other than as permitted in any relevant BMJ Author's Self Archiving Policies, I confirm this Work has not been accepted for publication elsewhere, is not being considered for publication elsewhere and does not duplicate material already published. I confirm all authors consent to publication of this Work and authorise the granting of this licence.

1  
2  
3 **Clinical Characteristics of Hospitalized COVID-19 Patients and the Impact on Mortality:**  
4  
5 **A Single-network, Retrospective Cohort Study from Pennsylvania State**  
6

7  
8 Kinjal P. Gadhiya,<sup>1\*</sup> Panupong Hansrivijit,<sup>1\*</sup> Mounika Gangireddy,<sup>1\*</sup> John D. Goldman<sup>2</sup>  
9

10 \*equivalent contribution  
11

12 <sup>1</sup>Department of Internal Medicine, UPMC Pinnacle, Harrisburg, PA 17104, USA;  
13

14 [kinjal268@gmail.com](mailto:kinjal268@gmail.com); [hansrivijit@upmc.edu](mailto:hansrivijit@upmc.edu); [g.mounikareddy07@gmail.com](mailto:g.mounikareddy07@gmail.com)  
15

16  
17 <sup>2</sup>Department of Infectious Diseases, UPMC Pinnacle, Harrisburg, PA 17104, USA;  
18

19 [goldmanjd@upmc.edu](mailto:goldmanjd@upmc.edu)  
20

21 **Running title:** COVID-19 and Clinical Impact: A Retrospective Study from Pennsylvania State  
22

23  
24 **Correspondence**  
25

26 Panupong Hansrivijit, M.D.  
27

28 205 South Front Street, Suite 3C  
29

30 Harrisburg, PA 17104  
31

32 [hansrivijit@upmc.edu](mailto:hansrivijit@upmc.edu)  
33  
34

35 **Keywords:** COVID-19, coronavirus, SARS-CoV-2, mortality, acute kidney injury  
36

37 **Word count:** 3,623 (excl. title page, abstract, legend, declarations, and references)  
38

39 **Funding:** None declared.  
40

41  
42 **Disclosure of Potential Conflicts of Interest:** The authors declared no potential conflicts of  
43  
44 interest.  
45  
46  
47  
48  
49  
50  
51  
52  
53  
54  
55  
56  
57  
58  
59  
60

## ABSTRACT

**Objective:** Coronavirus Disease 2019 (COVID-19) is a respiratory disease caused by severe acute respiratory syndrome coronavirus-2 (SARS-CoV-2) with highest burden in the United States. Data on clinical characteristics of COVID-19 patients in U.S. population are limited. Thus, we aim to determine the clinical characteristics and risk factors for in-hospital mortality from COVID-19.

**Design:** Retrospective observational study.

**Setting:** Single-network hospitals in Pennsylvania state.

**Participants:** Patients with confirmed SARS-CoV-2 infection who were hospitalized from March 1<sup>st</sup> to May 31<sup>st</sup>, 2020.

**Primary and secondary outcome measures:** Primary outcome was in-hospital mortality. Secondary outcomes were complications, such as acute kidney injury and acute respiratory distress syndrome (ARDS).

**Results:** Of 283 patients, 19.4% were non-survivors. The mean age of all patients was  $64.1 \pm 15.9$  years. 56.2% were male and 50.2% were white. In adjusted multivariate analyses, increasing age (per 1-year increment; OR 1.075), hypoxia ( $\text{SpO}_2 < 95\%$ ; OR 4.630), opacity/infiltrate on imaging (OR 3.077), leukocytosis ( $\text{WBC} > 10,000/\mu\text{L}$ ; OR 2.732), ferritin  $> 336$  ng/mL (OR 4.016), lactate dehydrogenase  $> 200$  U/L (OR 7.752), procalcitonin  $> 0.25$  ng/mL (OR 2.404), troponin I  $> 0.03$  ng/mL (OR 2.242), need for advanced oxygen support other than simple nasal cannula (OR 4.608-13.889), ICU admission/transfer (OR 13.699), renal replacement therapy (OR 21.277), need for vasopressor (OR 22.222), acute respiratory distress syndrome (OR 23.810), hydroxychloroquine (OR 2.165), ascorbic acid (OR 2.101), zinc (OR 3.425), convalescent plasma (OR 3.534), steroids therapy (OR 2.825), respiratory acidosis (OR

1  
2  
3 7.042), acute kidney injury (OR 3.571) and arrhythmias (OR 2.494) were significant risk factors  
4  
5 for increased in-hospital death. The median survival time was  $25.0 \pm 7.0$  days.  
6  
7

8 **Conclusion:** We reported the characteristics of ethnically diverse, hospitalized patients with  
9  
10 COVID-19 from Pennsylvania state.  
11  
12  
13  
14  
15  
16

### 17 **Strengths and Limitation of This Study**

#### 18 *Strength*

- 19 - This study is first retrospective cohort study of COVID-19 patients from the state of  
20  
21 Pennsylvania  
22  
23 - Our study is among one of few studies that reported the associations between ascorbic  
24  
25 acid and zinc supplementation and in-hospital mortality from COVID-19  
26  
27  
28  
29 - Multivariate analysis (binary logistic regression model) was used to report the results  
30  
31  
32

#### 33 *Limitation*

- 34 - Non-randomized design  
35  
36  
37 - Potential confounding factors should be considered  
38  
39  
40  
41  
42  
43

## 44 **INTRODUCTION**

45  
46 Coronavirus Disease 2019 (COVID-19) is a respiratory disease caused by Severe Acute  
47  
48 Respiratory Syndrome Coronavirus-2 (SARS-CoV-2) which has become a pandemic in early  
49  
50 2020. The spread of this virus was originally started in Wuhan, China in December 2019 and  
51  
52 rapidly escalated to 216 countries within five months with the highest number of infected cases  
53  
54  
55  
56  
57  
58  
59  
60

1  
2  
3 in the United States.<sup>1</sup> The reported mortality of COVID-19 in the United States was 5.92% as of  
4  
5 May 30<sup>th</sup>, 2020.<sup>1</sup>  
6

7  
8 Guan, et al first described the clinical characteristics of 1,099 patients infected with  
9  
10 SARS-CoV-2 across China.<sup>2</sup> In this study, the overall mortality was 1.4%. However, the  
11  
12 association between clinical risk factors and mortality was not described. Later Du et al and  
13  
14 Zhou et al demonstrated that older age, higher Sequential Organ Failure Assessment (SOFA)  
15  
16 score, D-dimer > 1 µg/mL, cardiac troponin I ≥ 0.05 ng/mL, and pre-existing concurrent  
17  
18 cardiovascular and cerebrovascular diseases were significant predictors for increased mortality  
19  
20 from COVID-19.<sup>3 4</sup> However, these findings were primarily based on Chinese population; thus, it  
21  
22 has been unconfirmed if the results can be applicable to other patient populations.  
23  
24

25  
26 As of May 30<sup>th</sup>, 2020, the Department of Health has announced more than 69,916  
27  
28 confirmed cases of COVID-19 leading to 5,555 deaths in the state of Pennsylvania.<sup>5</sup> To date, the  
29  
30 characteristics of infected patients in the United States were reported in the state of Washington  
31  
32 (n = 21), California (n = 1,299) and New York (n = 5,700) in chronological order.<sup>6-8</sup> The  
33  
34 mortality across the U.S. studies ranged from 6.3 to 24%, depending on the severity of COVID-  
35  
36 19. However, clinical risk factors for increased mortality in the U.S. population have not been  
37  
38 clearly established.  
39  
40

41  
42 Clinical management of COVID-19 has been dynamic and variable based on available  
43  
44 research, which has largely been *in vitro*, such as a combination of hydroxychloroquine and  
45  
46 azithromycin,<sup>9</sup> ascorbic acid,<sup>10</sup> ivermectin,<sup>11</sup> and zinc.<sup>12</sup> These therapies have not been proven  
47  
48 beneficial in clinical studies. In the current study, we provide our experience on treatment options  
49  
50 for patients infected with SARS-CoV-2.  
51  
52  
53  
54  
55  
56  
57  
58  
59  
60

1  
2  
3 In this retrospective cohort, we aimed to demonstrate the clinical characteristics of COVID-  
4 19 patients, treatment outcomes and the impact on in-hospital mortality. This study is intended to  
5 serve as one of the earliest cohorts of COVID-19 patients from the United States.  
6  
7  
8  
9  
10

## 11 **MATERIALS AND METHODS**

### 12 ***Study design***

13  
14  
15 This is a retrospective cohort study from seven hospitals under UPMC Pinnacle network  
16 located across the state of Pennsylvania. The protocol of this study has been approved by UPMC  
17 Pinnacle Institutional Review Board and UPMC Pinnacle Ethic Committee (#20E024). Written  
18 informed consent was waived due to the retrospective, observational nature of the study. Our  
19 current study followed the Declaration of Helsinki.  
20  
21  
22  
23  
24  
25  
26  
27

### 28 ***Patient and public involvement***

29 No patient involved.  
30  
31  
32

### 33 ***Data source and patient population***

34  
35 Data were collected by extracting electronic medical records from March 1<sup>st</sup> to May 31<sup>th</sup>,  
36 2020 through UPMC Pinnacle COVID-19 registry. Adult patients with age  $\geq 18$  years who were  
37 hospitalized with confirmed SARS-CoV-2 infection by real-time polymerase chain reaction (RT-  
38 PCR) from nasopharyngeal swab were included in this study. We excluded non-hospitalized  
39 patients, patients  $< 18$  years of age, presumed SARS-CoV-2 infection, pregnant women, out-of-  
40 system transfer and patients enrolled in clinical trials. Transfer within the system was considered  
41 one admission. For patients with multiple admissions with study period, the first admission for  
42 COVID-19 was reviewed.  
43  
44  
45  
46  
47  
48  
49  
50  
51  
52

### 53 ***Data collection***



1  
2  
3 Individual patient charts were reviewed. Collected data was divided into: demographics,  
4 comorbidities, signs and symptoms, laboratory findings, radiographic findings,  
5  
6 treatments/interventions, complications and outcomes. *Supplemental Documents 1* summarizes the  
7  
8 description of each variable in our cohort.  
9  
10

11  
12 Estimated glomerular filtration rate (eGFR) was calculated using CKD-EPI equation.<sup>13</sup>  
13  
14 Acute kidney injury (AKI) was defined by an increase in serum creatinine by 0.3 mg/dL (27  
15  $\mu\text{mol/L}$ ) or  $\geq 1.5$  times from the baseline value within 48 hours.<sup>14</sup> Chronic kidney disease (CKD)  
16  
17 was defined by the Kidney Diseases Improving Global Outcomes guidelines.<sup>15</sup> Patients with  
18  
19 history of end stage kidney disease (ESKD) on dialysis prior to admission, were not counted  
20  
21 toward 'requirement of renal replacement therapy (RRT)/hemodialysis (HD)' during the hospital  
22  
23 stay. Acute respiratory distress syndrome (ARDS) was defined by the Berlin criteria.<sup>16</sup>  
24  
25 Arrhythmias as complications were defined either tachy- or bradyarrhythmia that were new-onset,  
26  
27 occurred during hospitalization with COVID-19. In this study, prolongation of QT segment was  
28  
29 defined as the QT duration  $> 500$  milliseconds.  
30  
31  
32  
33

### 34 ***Study outcomes***

35  
36 The primary outcome was in-hospital mortality. The secondary outcome included  
37  
38 treatment outcomes and complications such as recovery/discharge, AKI, ARDS, arrhythmias, QT  
39  
40 prolongation, venous thromboembolism, arterial thrombosis, cerebrovascular events, heart  
41  
42 failure, and myocardial infarction.  
43  
44

### 45 ***Statistical analysis***

46  
47 All analyses were conducted using SPSS software version 23.0 (IBM Corp., Armonk,  
48  
49 NY, USA). Descriptive analyses were reported in percentage for categorical data and in mean  $\pm$   
50  
51 standard deviation (S.D.) or median (interquartile range; IQR) depending the data distribution.  
52  
53  
54  
55  
56  
57  
58  
59

1  
2  
3 Comparisons of outcomes for each variable were evaluated using Pearson's  $\chi^2$  tests or Fisher-  
4 Exact tests (for categorical data) and two-sample independent t-test (for continuous data). Fisher-  
5 Exact tests were opted if the total sample in any cell count was less than five. A p-value less than  
6 0.05 is considered statistically significant.  
7  
8  
9  
10  
11

### 12 ***Logistic regression analysis***

13  
14  
15 Clinical risk factors that were significant from standard analyses were included in  
16 univariate binary logistic regression analysis. Odds ratios (OR) were reported along with 95%  
17 confidence interval (CI). An 95% CI greater than 1.0 or less than 1.0 is considered statistically  
18 significant. Variables that remained statistically significant on univariate analysis were included  
19 in multivariate analysis using logistic regression method to adjust for other covariates. For the  
20 analyses of overall mortality predictors, Model 1 was adjusted for age, sex, ethnicity and obesity.  
21 Model 2 was adjusted for age, sex, ethnicity, obesity and need for oxygen therapy. Model 3 is  
22 adjusted for age, sex, ethnicity, obesity, asthma/chronic obstructive pulmonary disease (COPD)  
23 and need for oxygen therapy. Model 4 is adjusted for age, sex, ethnicity, obesity, CKD and need  
24 for oxygen therapy. Model 5 is adjusted for age, sex, ethnicity, obesity, coronary artery disease,  
25 heart failure and history of arrhythmia/conduction disorder.  
26  
27  
28  
29  
30  
31  
32  
33  
34  
35  
36  
37  
38  
39

### 40 ***Sensitivity analysis***

41  
42 The goodness-of-fit tests of logistic regression analyses were evaluated by Hosmer-  
43 Lemeshow method. The validity and sustainability of the significant results from multivariate  
44 analysis were tested using the bootstrap method to estimate the end point with imputed sample  
45 size of 1,000.  
46  
47  
48  
49  
50

### 51 ***Survival analysis***

1  
2  
3 Kaplan-Meier analysis was used to present the survival by plotting between cumulative  
4 survival against hospital stay in all included patients and in patients requiring ICU.  
5  
6  
7  
8  
9

## 10 RESULTS

### 11 *Baseline characteristics and patient outcomes*

12  
13  
14 The flowchart of data selection from the UPMC Pinnacle COVID-19 registry is depicted  
15 in *Figure 1*. A total of 322 patients with confirmed SARS-CoV-2 infection were identified during  
16 the study period. Of 322 patients, 39 patients (12.1%) were outpatient and did not require  
17 hospitalization. After excluding these patients, 283 patients were included for further analysis.  
18  
19 *Table 1* summarizes the demographics and baseline characteristics of included patients. All  
20 patients had confirmed SARS-Cov-2 infection by RT-PCR. Of 283 patients, 80.6% were survivors  
21 and 19.4% were non-survivors. The mean age of all patients was  $64.1 \pm 15.9$  years. 56.2% were  
22 male and 50.2% were Caucasian. Non-survivors were significantly older and had higher proportion  
23 of hypertension, CKD and had lower mean eGFR. Moreover, hypoxia on presentation,  
24 rales/crackles on physical examination, leukocytosis, lymphocytopenia, respiratory acidosis,  
25 transaminitis, and opacity/infiltrate on imaging were common presentations in non-survivors.  
26 Higher inflammatory markers, such as D-dimer, ferritin, lactate dehydrogenase (LDH), C-reactive  
27 protein, and procalcitonin were significantly prevalent in deceased patients. The need for oxygen  
28 therapy regardless of the mode of oxygen delivery was higher among those who did not survive.  
29 Furthermore, non-survivors were more likely to have received intensive care unit (ICU)  
30 admission/transfer, extracorporeal membrane oxygenation (ECMO), RRT, use of vasopressors,  
31 use of antibiotics, azithromycin, hydroxychloroquine, steroids, ascorbic acid, zinc, tocilizumab  
32 and convalescent plasma. Of overall complications, the prevalence of AKI, ARDS, arrhythmias  
33  
34  
35  
36  
37  
38  
39  
40  
41  
42  
43  
44  
45  
46  
47  
48  
49  
50  
51  
52  
53  
54  
55  
56  
57  
58  
59  
60

1  
2  
3 and superimposed bacteremia was significantly higher in non-survivors. There was no significant  
4 difference in mean hospital stay between survivors and non-survivors. Up to 78.8% recovered or  
5 were discharged from the hospital. Only two patients remained hospitalized as of June 18, 2020.  
6  
7 The mean hospital stay was similar between patients who received remdesivir vs. those who did  
8 not ( $9.0 \pm 4.7$  and  $7.6 \pm 7.8$  days, respectively;  $p = 0.359$ ). In contrast, patients who received  
9 tocilizumab had significantly longer hospital stay compared to those who did not receive  
10 tocilizumab ( $15.3 \pm 11.7$  and  $7.4 \pm 7.2$  days, respectively;  $p < 0.001$ ).

### 19 ***Univariate analysis***

21 All factors except superimposed bacteremia remained significant on univariate analysis.  
22 The OR of each clinical predictor for overall in-hospital mortality is depicted in *Table 2*. Logistic  
23 regression analysis cannot be performed on the following variables: D-dimer ( $> 500$  ng/mL), C-  
24 reactive protein ( $> 1$  mg/dL), and the need for ECMO as at least one cell count was zero.  
25 Moreover, in a univariate analysis, we found that hydroxychloroquine treatment was associated  
26 with increased risk of QT prolongation (OR 3.401; 95%CI 1.473-7.874;  $p = 0.002$ ).

### 35 ***Multivariate analysis***

37 Variables that were significant on univariate analysis were included in multivariate logistic  
38 regression analysis (*Table 3*). In Model 1 (adjusted for age, sex, ethnicity, and obesity), increasing  
39 patient age, hypoxia, opacity/infiltrate on imaging, leukocytosis, ferritin  $> 336$  ng/mL, LDH ( $>$   
40  $200$  U/L), procalcitonin  $> 0.25$  ng/mL, troponin I  $> 0.03$  ng/mL, use of high-flow oxygen nasal  
41 cannula, non-invasive positive pressure ventilation (NIPPV), mechanical ventilation, ICU  
42 admission/transfer, RRT, vasopressor, antibiotics and ARDS were independent risk factors for  
43 increased in-hospital mortality. In Model 2 (adjusted for all variables in Model 1 including the  
44 need for oxygen therapy), hydroxychloroquine, ascorbic acid, zinc, and convalescent plasma were  
45  
46  
47  
48  
49  
50  
51  
52  
53  
54  
55  
56  
57  
58  
59  
60

1  
2  
3 associated with increased mortality. In Model 3 (adjusted for all variables in Model 2 including  
4 asthma/COPD), respiratory acidosis and steroid therapy were associated with increased mortality.  
5  
6 AKI and arrhythmias were independent risk factors for in-hospital mortality from COVID-19 from  
7  
8 Model 4 and 5, respectively. Moreover, we also found that hydroxychloroquine therapy was  
9  
10 associated with QT prolongation (OR 2.874; 95% CI 1.189-6.944;  $p = 0.019$ ) after adjusted for  
11  
12 covariates in Model 2. The association of these variables and overall mortality remained significant  
13  
14 on bootstrap analysis when the sample size was imputed to 1,000.  
15  
16  
17

### 18 19 *Cohort of critically ill patients*

20  
21 A total 89 patients required intensive care during the study period. Of which, 47.2% died.  
22  
23 The demographics and clinical characteristics of critically ill patients are demonstrated in *Table*  
24  
25 4. Deceased ICU patients had significantly higher proportion of AKI and ARDS compared to  
26  
27 survived ICU patients. The treatments were similar between survivors and non-survivor patients.  
28  
29 In multivariate analysis, AKI (OR 3.759, 95% CI 1.342-10.526;  $p = 0.012$ ) and ARDS (OR  
30  
31 7.937; 95% CI 2.857-21.739;  $p < 0.001$ ) are significantly predictive of in-hospital mortality  
32  
33 among patients admitted the ICU after adjusted for age, sex, and ethnicity.  
34  
35  
36

### 37 38 *Survival analysis*

39  
40 Survival analysis was evaluated using Kaplan-Meier curve (*Figure 2*). In our analysis, the  
41  
42 cumulative survival declined with increasing length of hospital stay. The median survival time  
43  
44 was 25.0 days with standard error of 7.0.  
45  
46  
47  
48

## 49 **DISCUSSION**

50  
51 In this single-network, retrospective observation study, we found that the overall in-  
52  
53 hospital mortality among hospitalized COVID-19 patients was 19.4%. The reported mortality  
54  
55  
56  
57  
58  
59

1  
2  
3 among Chinese cohorts ranged from 11.7% to 28.2%.<sup>3 4 17</sup> However, our reported mortality rates  
4  
5 appeared slightly lower than what previously described from New York City.<sup>8</sup> Richardson et al  
6  
7 found that the overall mortality of 5,700 hospitalized COVID-19 patients from 12 hospitals in  
8  
9 New York City was 21%. However, one could argue that our study has significantly smaller  
10  
11 sample size which might underestimate the actual mortality of COVID-19. Our data need  
12  
13 confirmation from other studies with a larger sample size.  
14  
15

16  
17 We identified several risk factors for mortality from COVID-19 using multivariate  
18  
19 logistic regression analysis. Increasing age, hypoxia and opacity/infiltrate on imaging were  
20  
21 associated with higher mortality. Moreover, we also found that patient survival diminished as the  
22  
23 disease progressed, reflected by advancement in oxygen delivery (high-flow nasal cannula,  
24  
25 NIPPV, and mechanical ventilation). Requiring a simple oxygen nasal cannula did not affect  
26  
27 mortality. Such findings are similar to previous literature. Older age is an independent risk factor  
28  
29 for severe COVID-19 and mortality.<sup>3 18</sup> In line with Zhou et al, increasing oxygen requirement  
30  
31 and need for advanced oxygen delivery were predictive of death from COVID-19.<sup>4</sup>  
32  
33  
34

35  
36 Here, we showed that COVID-19 patients requiring ICU had 13.7-fold increased risk of  
37  
38 mortality. Critically ill patients generally had one or more organs in failure, and an increasing  
39  
40 number of organ failure has been linked to elevated death in sepsis patients.<sup>19</sup> For COVID-19  
41  
42 patients, we demonstrated that kidney (AKI, and RRT), pulmonary (respiratory acidosis, and  
43  
44 ARDS), cardiovascular (arrhythmias, and vasopressor requirement) failure were predictive of in-  
45  
46 hospital mortality. These findings are in line with other cohorts and each factor has been  
47  
48 demonstrated as an independent risk factor for mortality in critically ill patients.<sup>4 20-24</sup> Although  
49  
50 the complications from SARS-CoV-2 infection can be affected by multiple contributing factors,  
51  
52 newer evidence has suggested the significance of cytokine storm leading to multi-organ failure.<sup>25</sup>  
53  
54  
55  
56  
57  
58  
59  
60

1  
2  
3 Here, we showed that elevated ferritin, LDH, procalcitonin, leukocytosis, troponin I and  
4 possibly D-dimer were associated with increased death. Although, the odds ratio for D-dimer  
5 cannot be calculated as one cell was zero, we observed that all deceased patients had elevated D-  
6 dimer level and the significance of elevated D-dimer toward in-hospital mortality cannot be  
7 ignored. Guan et al first demonstrated the importance of elevated inflammatory markers in  
8 COVID-19 in Chinese population<sup>2</sup> which has become a standard monitoring parameter for  
9 COVID-19 patients.<sup>26</sup> Elevated inflammatory markers should prompt physicians to evaluate and  
10 monitor the patients for cytokine storms and anticipated clinical deterioration. Elevated  
11 procalcitonin and leukocytosis may indicate concomitant bacterial infection, which has been  
12 shown to increase morbidity and mortality of viral pneumonia.<sup>27</sup> Interestingly, our study showed  
13 that elevated troponin I level was associated with significantly higher death similar to a recent  
14 meta-analysis.<sup>28</sup> Although the etiologies of elevated troponin levels were not determined in our  
15 cohort, other studies proposed several mechanisms for elevated troponin level in COVID-19  
16 patients. These include myocarditis, cytokine mediated myocardial injury, microangiopathy of  
17 small coronary arteries, or silent coronary artery disease.<sup>24 28</sup>

18  
19 The pathophysiology of cytokine storm in SARS-CoV-2 is similar to that of other viruses  
20 or bacteria.<sup>29</sup> Cytokine storm is characterized by the overproduction of pro-inflammatory  
21 cytokines, such as tumor necrosis factor (TNF), IL-6, and IL-1 $\beta$  resulting in an increased  
22 vascular hyperpermeability, and activation of multiple coagulation pathways.<sup>25 30</sup> In light of  
23 SARS-CoV-2-induced hypercoagulation, antithrombin III, tissue factor pathway inhibitor and  
24 the protein C system were impaired during active inflammation.<sup>31</sup> These changes lead to  
25 thrombin hyperactivity resulting in the development of microthrombosis, disseminated  
26 intravascular coagulation (DIC) and sequential multiorgan failure.<sup>25</sup> Moreover, new studies have

1  
2  
3 revealed the spectrum of hyperferritinemic syndromes induced by SARS-CoV-2 but they are  
4 beyond the scope of our article.<sup>32</sup> Such syndromes include macrophage activation syndrome,  
5  
6 adult-onset Still's disease, and catastrophic anti-phospholipid syndrome.<sup>32</sup>  
7  
8  
9

10 Hydroxychloroquine therapy was associated with a 3-fold increased risk of QT  
11  
12 prolongation and a 2-fold increased risk of death. The concept of using hydroxychloroquine in  
13  
14 COVID-19 patients derived from an early *in vitro* study.<sup>33</sup> The results from small non-  
15  
16 randomized clinical trials also showed promising effects on viral load reduction.<sup>34 35</sup> However,  
17  
18 the clinical benefit of hydroxychloroquine was debated by a large observation study. Of 1,446  
19  
20 patients, Geleris et al observed that hydroxychloroquine had no effect on the death, length of stay  
21  
22 or intubation.<sup>36</sup> Thus, the recommendation for use of hydroxychloroquine was recalled by the  
23  
24 Infectious Diseases Society of America (IDSA) due to small sample size in previous clinical  
25  
26 trials and concern for cardiac adverse effects, such as QT prolongation/torsade de pointe.<sup>37</sup>  
27  
28  
29 Whether hydroxychloroquine has clinical benefits is yet to be discovered in a multi-center  
30  
31 randomized controlled trial (NCT04370782).  
32  
33  
34

35 A meta-analysis of four randomized trials and one retrospective study showed that the  
36  
37 administration of intravenous vitamin C has vasopressor sparing effects and may reduce the need  
38  
39 for mechanical ventilation in critically ill patients while there was no effect on the mortality.<sup>38</sup>  
40  
41  
42 However, given the lack of more supporting evidence, the standard use of ascorbic acid is not yet  
43  
44 recommended especially in COVID-19 patients. A new clinical trial investigating the treatment  
45  
46 outcome of vitamin C in severe COVID-19 is underway (NCT04264533).  
47  
48

49 Our study is the first cohort showing that zinc supplementation was associated with  
50  
51 increased mortality in COVID-19 patients. A Brazilian study revealed that plasma zinc  
52  
53 concentration in critically ill patients upon admission to the ICU was low and may make these  
54  
55  
56  
57  
58  
59  
60



1  
2  
3 patients more susceptible to oxidative stress.<sup>39</sup> Another prospective study showed that zinc  
4 supplementation in mechanically ventilated patients was related to less ventilator-associated  
5 pneumonia.<sup>40</sup> However, the mean duration of intubation in this study was prolonged (29 days),  
6 making it inconclusive if zinc supplementation can prevent pneumonia development in short-  
7 term intubation. Thus, the use of zinc supplementation in COVID-19 patients should be  
8 discouraged until supporting evidence from randomized controlled trials is available.  
9  
10  
11  
12  
13  
14  
15  
16

17 Steroid therapy in COVID-19 patients was associated with increased mortality. However,  
18 one limitation that a causal relationship between corticosteroids and mortality was difficult to  
19 establish given that our deceased patients had been generally more ill and sustained multi-organ  
20 failure, which predisposed them to receive several treatment interventions, including  
21 corticosteroids, which could result in significant statistical evaluation. A meta-analysis of 42  
22 randomized controlled trials consisting of 10,194 patients has shown that corticosteroids possibly  
23 result in a small reduction in mortality and an increased risk of neuromuscular weakness among  
24 critically ill patients with sepsis.<sup>41</sup> However, the theoretical concept for corticosteroid use in  
25 COVID-19 was to reduce cytokine storm caused by a reaction to SARS-CoV-2 infection.<sup>42</sup> In  
26 early April 2020, the IDSA recommended against a routine use of corticosteroids in the  
27 treatment of COVID-19 due to lack of evidence.<sup>37</sup> This guidelines was updated on June 25<sup>th</sup>,  
28 2020 after the result release of the RECOVERY trial showing that patients who received  
29 dexamethasone were more likely to be discharged from hospital at 28 days.<sup>43</sup> Thus, currently, the  
30 IDSA panel suggests glucocorticoids use in hospitalized patients with severe COVID-19.<sup>37</sup> Here,  
31 our findings contradict with the recommendation from the IDSA. The discrepancy could be  
32 resulted from several factor, such as selection bias, confounding bias and small sample size.  
33  
34  
35  
36  
37  
38  
39  
40  
41  
42  
43  
44  
45  
46  
47  
48  
49  
50  
51  
52  
53  
54  
55  
56  
57  
58  
59  
60

1  
2  
3 Our cohort demonstrated that remdesivir and tocilizumab were not associated with  
4 mortality and there was no significant improvement in hospital length of stay between in patients  
5 receiving these drugs. Recently, the preliminary report from a phase 3 randomized controlled  
6 trial revealed that remdesivir was superior to placebo in shortening the time to recovery in adults  
7 hospitalized with COVID-19.<sup>44</sup> Several retrospective studies reported that tocilizumab, an IL-6  
8 inhibitor, was shown to reduce the levels of serum inflammatory markers. However, the impact  
9 on clinical improvement and mortality remained inconclusive.<sup>45-47</sup> Although we reported no  
10 significant clinical benefits from tocilizumab, the consideration for compassionate use of  
11 tocilizumab is not discouraged but rather dependent on the judgment of clinicians based on  
12 current evidence. A phase 2 (TOCIVID-19; NCT04317092) and 3 randomized controlled trial  
13 (COVACTA; NCT04320615) of tocilizumab is being investigated for the treatment of COVID-  
14 19 pneumonia. The preliminary results are expected to release in late 2020.

15  
16  
17 Similarly, although we found that convalescent plasma was predictive of in-hospital  
18 mortality, one important limitation should be considered here. The safety of convalescent plasma  
19 was demonstrated in a single-center retrospective cohort of 25 patients<sup>48</sup> and in a preprint, non-  
20 peer review report.<sup>49</sup> However, the efficacy of convalescent plasma remained undetermined due  
21 to lack of control group. At our institution, convalescent plasma is considered if patients have  
22 severe symptoms and have contraindications to remdesivir, such as AKI and hepatic dysfunction.  
23 With these complications, the mortality is generally higher resulting in potential selection and  
24 confounding bias. The IDSA panel has recommended convalescent plasma only in the context of  
25 a clinical trials To date, at least one randomized controlled trila (NCT04342182) is being  
26 investigated to establish the clinical benefits in hospitalized patients with severe COVID-19.  
27  
28  
29  
30  
31  
32  
33  
34  
35  
36  
37  
38  
39  
40  
41  
42  
43  
44  
45  
46  
47  
48  
49  
50  
51  
52  
53  
54  
55  
56  
57  
58  
59  
60

1  
2  
3 From our ICU cohort, AKI and ARDS were the only two variables that were predictive of  
4 mortality among patients admitted to the ICU. Interestingly, all treatment measures had no effect  
5 on mortality once patients were critically ill and required ICU. This could imply that these  
6 treatment interventions might be beneficial if given prior to clinical decompensation or ICU  
7 transfer. However, interpretation is restricted due to small sample size and examining only  
8 critically ill patients. Our hypothesis should be substantiated by studies from other institutions  
9 with larger sample sizes.  
10  
11  
12  
13  
14  
15  
16  
17  
18

19 Our study has some limitations. The observational design made the results susceptible to  
20 selection bias. Analyses could be underpowered given the small sample size. However, we  
21 improved the validity of the results by performing bootstrapping analysis. Moreover, due to  
22 restricted availability, not many cases had received compassionate use of tocilizumab, remdesivir,  
23 and convalescent plasma, which may limit the applicability of our findings. More importantly,  
24 mortality can be affected by confounding factors. We minimize this risk by applying multivariate  
25 analysis. Most of the collected data were cross sectional, thus, making it difficult to conclude the  
26 causality between two variables.  
27  
28  
29  
30  
31  
32  
33  
34  
35  
36  
37

38 In conclusion, COVID-19 is a serious condition with a significant in-hospital mortality  
39 rate. Multiple risk factors for in-hospital death were identified. Hydroxychloroquine, ascorbic  
40 acid, zinc supplementation, and corticosteroids therapy were not recommended due to increased  
41 mortality risk.  
42  
43  
44  
45  
46  
47  
48

## 49 **Acknowledgement**

50  
51 We would like to thank UPMC Pinnacle IT support for medical record procurement and Mrs.  
52 Yijin Wert for constructing the Kaplan-Meier curves.  
53  
54  
55  
56  
57  
58  
59  
60

1  
2  
3  
4  
5  
6  
7  
8  
9  
10  
11  
12 **Figure 1.** Flowchart of subject selection from UPMC Pinnacle COVID-19 registry from March 1  
13 to May 31, 2020.  
14

15  
16  
17 **Figure 2.** Survival analysis by Kaplan-Meier curves. **A)** The cumulative survival declined with  
18 increasing length of hospital stay. The median survival time was 25 days with standard error (SE)  
19 of 7.0. **B)** ICU patients significantly lower survival probability with mean survival time of 22.3  
20 days (SE 1.8) and 23.0 (SE 1.3) in ICU group vs. non-ICU group, respectively ( $p = 0.002$ ).  
21  
22  
23  
24  
25  
26  
27  
28  
29  
30  
31  
32  
33  
34  
35  
36  
37  
38  
39  
40  
41  
42  
43  
44  
45  
46  
47  
48  
49  
50  
51  
52  
53  
54  
55  
56  
57  
58  
59  
60

## DECLARATIONS

**Funding:** None

**Disclosure of Potential Conflicts of Interest:** The authors declared no potential conflicts of interest.

**Ethics Approval:** UPMC Pinnacle Ethic Committee approved this study (#20E024).

**Informed Consent:** Not applicable.

**Data sharing statement:** No additional data.

**Code availability:** Not applicable.

**Authors' contributions:** K.P.G., P.H., M.G. collected the data. P.H. analyzed the data. K.P.G. and P.H. drafted the manuscript. All authors edited and approved the manuscript for submission.

## REFERENCES

1. WHO. Coronavirus disease (COVID-19) pandemic. <https://www.who.int/emergencies/diseases/novel-coronavirus-2019>. Accessed on June 1st 2020
2. Guan W-j, Ni Z-y, Hu Y, et al. Clinical Characteristics of Coronavirus Disease 2019 in China. *New England Journal of Medicine* 2020;382(18):1708-20. doi: 10.1056/NEJMoa2002032
3. Du RH, Liang LR, Yang CQ, et al. Predictors of mortality for patients with COVID-19 pneumonia caused by SARS-CoV-2: a prospective cohort study. *Eur Respir J* 2020;55(5) doi: 10.1183/13993003.00524-2020 [published Online First: 2020/04/10]
4. Zhou F, Yu T, Du R, et al. Clinical course and risk factors for mortality of adult inpatients with COVID-19 in Wuhan, China: a retrospective cohort study. *Lancet* 2020;395(10229):1054-62. doi: 10.1016/s0140-6736(20)30566-3 [published Online First: 2020/03/15]
5. Department of Health. COVID-19 Data for Pennsylvania. <https://www.health.pa.gov/topics/disease/coronavirus/Pages/Cases.aspx>. Accessed on June 1st
6. Arentz M, Yim E, Klaff L, et al. Characteristics and Outcomes of 21 Critically Ill Patients With COVID-19 in Washington State. *JAMA* 2020;323(16):1612-14. doi: 10.1001/jama.2020.4326
7. Myers LC, Parodi SM, Escobar GJ, et al. Characteristics of Hospitalized Adults With COVID-19 in an Integrated Health Care System in California. *Jama* 2020 doi: 10.1001/jama.2020.7202 [published Online First: 2020/04/25]
8. Richardson S, Hirsch JS, Narasimhan M, et al. Presenting Characteristics, Comorbidities, and Outcomes Among 5700 Patients Hospitalized With COVID-19 in the New York City Area. *Jama* 2020;323(20):2052-9. doi: 10.1001/jama.2020.6775 [published Online First: 2020/04/23]
9. Gautret P, Lagier JC, Parola P, et al. Hydroxychloroquine and azithromycin as a treatment of COVID-19: results of an open-label non-randomized clinical trial. *Int J Antimicrob Agents* 2020:105949.
10. Fowler AA, 3rd, Truwit JD, Hite RD, et al. Effect of Vitamin C Infusion on Organ Failure and Biomarkers of Inflammation and Vascular Injury in Patients With Sepsis and Severe Acute Respiratory Failure: The CITRIS-ALI Randomized Clinical Trial. *Jama* 2019;322(13):1261-70. doi: 10.1001/jama.2019.11825 [published Online First: 2019/10/02]
11. Caly L, Druce JD, Catton MG, et al. The FDA-approved drug ivermectin inhibits the replication of SARS-CoV-2 in vitro. *Antiviral Res* 2020;178:104787. doi: 10.1016/j.antiviral.2020.104787 [published Online First: 2020/04/07]

12. te Velthuis AJ, van den Worm SH, Sims AC, et al. Zn(2+) inhibits coronavirus and arterivirus RNA polymerase activity in vitro and zinc ionophores block the replication of these viruses in cell culture. *PLoS Pathog* 2010;6(11):e1001176. doi: 10.1371/journal.ppat.1001176 [published Online First: 2010/11/17]
13. Levey AS, Stevens LA, Schmid CH, et al. A new equation to estimate glomerular filtration rate. *Ann Intern Med* 2009;150(9):604-12. doi: 10.7326/0003-4819-150-9-200905050-00006 [published Online First: 2009/05/06]
14. Khwaja A. KDIGO clinical practice guidelines for acute kidney injury. *Nephron Clin Pract* 2012;120(4):c179-84. doi: 10.1159/000339789 [published Online First: 2012/08/15]
15. KDIGO clinical practice guideline for the diagnosis, evaluation, prevention, and treatment of Chronic Kidney Disease-Mineral and Bone Disorder (CKD-MBD). *Kidney Int Suppl* 2009(113):S1-130. doi: 10.1038/ki.2009.188 [published Online First: 2009/08/01]
16. Ferguson ND, Fan E, Camporota L, et al. The Berlin definition of ARDS: an expanded rationale, justification, and supplementary material. *Intensive Care Med* 2012;38(10):1573-82. doi: 10.1007/s00134-012-2682-1 [published Online First: 2012/08/29]
17. Cheng Y, Luo R, Wang K, et al. Kidney disease is associated with in-hospital death of patients with COVID-19. *Kidney Int* 2020;97(5):829-38. doi: 10.1016/j.kint.2020.03.005 [published Online First: 2020/04/06]
18. Li X, Xu S, Yu M, et al. Risk factors for severity and mortality in adult COVID-19 inpatients in Wuhan. *J Allergy Clin Immunol* 2020 doi: 10.1016/j.jaci.2020.04.006 [published Online First: 2020/04/16]
19. Gustot T. Multiple organ failure in sepsis: prognosis and role of systemic inflammatory response. *Curr Opin Crit Care* 2011;17(2):153-9. doi: 10.1097/MCC.0b013e328344b446 [published Online First: 2011/02/25]
20. Elseviers MM, Lins RL, Van der Niepen P, et al. Renal replacement therapy is an independent risk factor for mortality in critically ill patients with acute kidney injury. *Crit Care* 2010;14(6):R221. doi: 10.1186/cc9355 [published Online First: 2010/12/03]
21. Martin C, Viviani X, Leone M, et al. Effect of norepinephrine on the outcome of septic shock. *Crit Care Med* 2000;28(8):2758-65. doi: 10.1097/00003246-200008000-00012 [published Online First: 2000/08/31]
22. Wang CY, Calfee CS, Paul DW, et al. One-year mortality and predictors of death among hospital survivors of acute respiratory distress syndrome. *Intensive Care Med* 2014;40(3):388-96. doi: 10.1007/s00134-013-3186-3 [published Online First: 2014/01/18]
23. Combes A, Costa MA, Trouillet JL, et al. Morbidity, mortality, and quality-of-life outcomes of patients requiring  $\geq 14$  days of mechanical ventilation. *Crit Care Med* 2003;31(5):1373-81. doi: 10.1097/01.Ccm.0000065188.87029.C3 [published Online First: 2003/05/29]
24. Li J-W, Han T-W, Woodward M, et al. The impact of 2019 novel coronavirus on heart injury: A Systematic review and Meta-analysis. *Progress in Cardiovascular Diseases* 2020 doi: <https://doi.org/10.1016/j.pcad.2020.04.008>
25. Jose RJ, Manuel A. COVID-19 cytokine storm: the interplay between inflammation and coagulation. *Lancet Respir Med* 2020;8(6):e46-e47. doi: 10.1016/s2213-2600(20)30216-2 [published Online First: 2020/05/01]



26. Annane D, Pastores SM, Rochweg B, et al. Guidelines for the Diagnosis and Management of Critical Illness-Related Corticosteroid Insufficiency (CIRCI) in Critically Ill Patients (Part I): Society of Critical Care Medicine (SCCM) and European Society of Intensive Care Medicine (ESICM) 2017. *Crit Care Med* 2017;45(12):2078-88. doi: 10.1097/ccm.0000000000002737 [published Online First: 2017/09/25]
27. Morris DE, Cleary DW, Clarke SC. Secondary Bacterial Infections Associated with Influenza Pandemics. *Front Microbiol* 2017;8:1041. doi: 10.3389/fmicb.2017.01041 [published Online First: 2017/07/12]
28. Vrsalovic M, Vrsalovic Presecki A. Cardiac troponins predict mortality in patients with COVID-19: A meta-analysis of adjusted risk estimates. *J Infect* 2020 doi: 10.1016/j.jinf.2020.05.022 [published Online First: 2020/05/18]
29. Tisoncik JR, Korth MJ, Simmons CP, et al. Into the eye of the cytokine storm. *Microbiol Mol Biol Rev* 2012;76(1):16-32. doi: 10.1128/mubr.05015-11 [published Online First: 2012/03/07]
30. Meduri GU, Kohler G, Headley S, et al. Inflammatory cytokines in the BAL of patients with ARDS. Persistent elevation over time predicts poor outcome. *Chest* 1995;108(5):1303-14. doi: 10.1378/chest.108.5.1303 [published Online First: 1995/11/01]
31. José RJ, Williams AE, Chambers RC. Proteinase-activated receptors in fibroproliferative lung disease. *Thorax* 2014;69(2):190-2. doi: 10.1136/thoraxjnl-2013-204367 [published Online First: 2013/11/05]
32. Colafrancesco S, Alessandri C, Conti F, et al. COVID-19 gone bad: A new character in the spectrum of the hyperferritinemic syndrome? *Autoimmun Rev* 2020;19(7):102573. doi: 10.1016/j.autrev.2020.102573 [published Online First: 2020/05/11]
33. Biot C, Daher W, Chavain N, et al. Design and synthesis of hydroxyferroquine derivatives with antimalarial and antiviral activities. *J Med Chem* 2006;49(9):2845-9. doi: 10.1021/jm0601856 [published Online First: 2006/04/28]
34. Gao J, Tian Z, Yang X. Breakthrough: Chloroquine phosphate has shown apparent efficacy in treatment of COVID-19 associated pneumonia in clinical studies. *Bioscience trends* 2020
35. Gautret P, Lagier JC, Parola P, et al. Hydroxychloroquine and azithromycin as a treatment of COVID-19: results of an open-label non-randomized clinical trial. *Int J Antimicrob Agents* 2020:105949. doi: 10.1016/j.ijantimicag.2020.105949 [published Online First: 2020/03/25]
36. Geleris J, Sun Y, Platt J, et al. Observational Study of Hydroxychloroquine in Hospitalized Patients with Covid-19. *N Engl J Med* 2020;382(25):2411-18. doi: 10.1056/NEJMoa2012410 [published Online First: 2020/05/08]
37. Bhimraj A, Morgan RL, Shumaker AH, et al. Infectious Diseases Society of America Guidelines on the Treatment and Management of Patients with COVID-19. *Clin Infect Dis* 2020 doi: 10.1093/cid/ciaa478 [published Online First: 2020/04/28]
38. Zhang M, Jativa DF. Vitamin C supplementation in the critically ill: A systematic review and meta-analysis. *SAGE Open Med* 2018;6:2050312118807615. doi: 10.1177/2050312118807615 [published Online First: 2018/10/27]
39. Cirino Ruocco MA, Pacheco Cechinatti ED, Barbosa F, Jr., et al. Zinc and selenium status in critically ill patients according to severity stratification. *Nutrition* 2018;45:85-89. doi: 10.1016/j.nut.2017.07.009 [published Online First: 2017/11/14]



- 1  
2  
3  
4  
5  
6  
7  
8  
9  
10  
11  
12  
13  
14  
15  
16  
17  
18  
19  
20  
21  
22  
23  
24  
25  
26  
27  
28  
29  
30  
31  
32  
33  
34  
35  
36  
37  
38  
39  
40  
41  
42  
43  
44  
45  
46  
47  
48  
49  
50  
51  
52  
53  
54  
55  
56  
57  
58  
59  
60
40. Hasanzadeh Kiabi F, Alipour A, Darvishi-Khezri H, et al. Zinc Supplementation in Adult Mechanically Ventilated Trauma Patients is Associated with Decreased Occurrence of Ventilator-associated Pneumonia: A Secondary Analysis of a Prospective, Observational Study. *Indian J Crit Care Med* 2017;21(1):34-39. doi: 10.4103/0972-5229.198324 [published Online First: 2017/02/16]
  41. Annetta M, Maviglia R, Proietti R, et al. Use of corticosteroids in critically ill septic patients : a review of mechanisms of adrenal insufficiency in sepsis and treatment. *Curr Drug Targets* 2009;10(9):887-94. doi: 10.2174/138945009789108792 [published Online First: 2009/10/06]
  42. Scaroni C, Armigliato M, Cannavò S. COVID-19 outbreak and steroids administration: are patients treated for Sars-Cov-2 at risk of adrenal insufficiency? *J Endocrinol Invest* 2020:1-2. doi: 10.1007/s40618-020-01253-1 [published Online First: 2020/04/18]
  43. Horby P, Lim WS, Emberson J, et al. Effect of Dexamethasone in Hospitalized Patients with COVID-19: Preliminary Report. *medRxiv* 2020:2020.06.22.20137273. doi: 10.1101/2020.06.22.20137273
  44. Beigel JH, Tomashek KM, Dodd LE, et al. Remdesivir for the Treatment of Covid-19 — Preliminary Report. *New England Journal of Medicine* 2020 doi: 10.1056/NEJMoa2007764
  45. Luo P, Liu Y, Qiu L, et al. Tocilizumab treatment in COVID-19: A single center experience. *J Med Virol* 2020;92(7):814-18. doi: 10.1002/jmv.25801 [published Online First: 2020/04/08]
  46. Alattar R, Ibrahim TBH, Shaar SH, et al. Tocilizumab for the treatment of severe coronavirus disease 2019. *J Med Virol* 2020 doi: 10.1002/jmv.25964 [published Online First: 2020/05/06]
  47. Campochiaro C, Della-Torre E, Cavalli G, et al. Efficacy and safety of tocilizumab in severe COVID-19 patients: a single-centre retrospective cohort study. *Eur J Intern Med* 2020;76:43-49. doi: 10.1016/j.ejim.2020.05.021 [published Online First: 2020/06/03]
  48. Salazar E, Perez KK, Ashraf M, et al. Treatment of Coronavirus Disease 2019 (COVID-19) Patients with Convalescent Plasma. *Am J Pathol* 2020 doi: 10.1016/j.ajpath.2020.05.014 [published Online First: 2020/05/31]
  49. Joyner M, Wright RS, Fairweather D, et al. Early Safety Indicators of COVID-19 Convalescent Plasma in 5,000 Patients. *medRxiv* 2020:2020.05.12.20099879. doi: 10.1101/2020.05.12.20099879

**Table 1.** Demographics and baseline characteristics of included patients.

| Characteristics                            | All patients<br>(n = 283) | Survivors<br>(n = 228)   | Non-survivors<br>(n = 55) | P-value  |
|--------------------------------------------|---------------------------|--------------------------|---------------------------|----------|
| Male                                       | 159 (56.2)                | 125 (54.8)               | 34 (61.8)                 | 0.348    |
| Age (year)                                 | 64.1 (15.9) <sup>†</sup>  | 61.9 (15.8) <sup>†</sup> | 72.8 (13.5) <sup>†</sup>  | < 0.001* |
| <i>Ethnicity</i>                           |                           |                          |                           |          |
| Caucasian                                  | 143 (50.5)                | 111 (48.7)               | 32 (58.2)                 | 0.705    |
| African-American                           | 88 (31.1)                 | 73 (32.0)                | 15 (27.3)                 |          |
| Hispanic/Latino                            | 32 (11.3)                 | 27 (11.8)                | 5 (9.1)                   |          |
| Asian                                      | 17 (6.0)                  | 14 (6.1)                 | 3 (5.5)                   |          |
| Others                                     | 3 (1.1)                   | 3 (1.3)                  | 0 (0)                     |          |
| <i>Co-morbidities</i>                      |                           |                          |                           |          |
| Obesity (BMI $\geq$ 30 kg/m <sup>2</sup> ) | 132 (46.6)                | 102 (44.7)               | 30 (54.5)                 | 0.191    |
| Current/Former smokers                     | 109 (38.5)                | 88 (38.6)                | 21 (38.2)                 | 0.955    |
| Hypertension                               | 189 (66.8)                | 145 (63.6)               | 44 (80.0)                 | 0.020*   |
| Diabetes mellitus                          | 108 (38.2)                | 81 (35.5)                | 27 (49.1)                 | 0.063    |
| Hyperlipidemia                             | 121 (42.8)                | 94 (41.2)                | 27 (49.1)                 | 0.290    |
| Coronary artery disease                    | 50 (17.7)                 | 40 (17.5)                | 10 (18.2)                 | 0.911    |
| Heart failure/cardiomyopathy               | 53 (18.7)                 | 40 (17.5)                | 13 (23.6)                 | 0.299    |
| Arrhythmia/conduction disorders            | 45 (15.9)                 | 36 (15.8)                | 9 (16.4)                  | 0.917    |
| Chronic kidney disease                     | 66 (23.3)                 | 46 (20.2)                | 20 (36.4)                 | 0.011*   |
| End-stage kidney disease                   | 13 (4.6)                  | 12 (5.3)                 | 1 (1.8)                   | 0.474    |
| Asthma/COPD                                | 73 (25.8)                 | 54 (23.7)                | 19 (34.5)                 | 0.098    |
| Cerebrovascular disease                    | 40 (14.1)                 | 32 (14.0)                | 8 (14.5)                  | 0.922    |
| <i>Signs and symptoms</i>                  |                           |                          |                           |          |

|                                       |              |              |              |          |
|---------------------------------------|--------------|--------------|--------------|----------|
| Cough                                 | 185 (65.4)   | 149 (65.4)   | 36 (65.5)    | 0.988    |
| Dyspnea                               | 203 (71.7)   | 158 (69.3)   | 45 (81.8)    | 0.064    |
| Hypoxia (SpO <sub>2</sub> < 95%)      | 178 (62.9)   | 130 (57.0)   | 48 (87.3)    | < 0.001* |
| Rhinorrhea                            | 29 (10.2)    | 26 (11.4)    | 3 (5.5)      | 0.226    |
| Fever/chills                          | 179 (63.3)   | 143 (62.7)   | 36 (65.5)    | 0.706    |
| Chest pain                            | 35 (12.4)    | 32 (14.0)    | 3 (5.5)      | 0.109    |
| Headache                              | 28 (9.9)     | 26 (11.4)    | 2 (3.6)      | 0.128    |
| Gastrointestinal symptoms             | 79 (27.9)    | 68 (29.8)    | 11 (20.0)    | 0.145    |
| Asymptomatic                          | 8 (2.8)      | 8 (3.5)      | 0 (0)        | 0.361    |
| Rales/crackles                        | 57 (20.1)    | 40 (17.5)    | 17 (30.9)    | 0.027*   |
| Rhonchi                               | 57 (20.1)    | 45 (19.7)    | 12 (21.8)    | 0.730    |
| Reduced breath sound                  | 63 (22.3)    | 48 (21.1)    | 15 (27.3)    | 0.320    |
| <b>Laboratory findings</b>            |              |              |              |          |
| Leukopenia (WBC < 4,000 /uL)          | 56 (19.8)    | 46 (20.2)    | 10 (18.2)    | 0.739    |
| Leukocytosis (WBC > 10,000 /uL)       | 80 (28.3)    | 53 (23.2)    | 27 (49.1)    | < 0.001* |
| Lymphocytopenia (ALC < 1,000 / uL)    | 109 (38.7)   | 78 (34.2)    | 31 (57.4)    | 0.002*   |
| Thrombocytopenia (< 140,000 /uL)      | 57 (20.1)    | 41 (18.0)    | 16 (29.1)    | 0.065    |
| Thrombocytosis (> 400,000 /uL)        | 31 (11.0)    | 25 (11.0)    | 6 (10.9)     | 0.991    |
| Respiratory acidosis                  | 43 (21.3)    | 18 (11.8)    | 25 (50.0)    | < 0.001* |
| Transaminitis (ALT > 3X UNL)          | 33 (12.4)    | 21 (9.9)     | 12 (21.8)    | 0.017*   |
| Serum creatinine (mg/dL) on admission | 1.06 (0.72)‡ | 1.59 (1.88)† | 1.64 (1.15)† | 0.808    |
| eGFR (mL/min/1.73m <sup>2</sup> )     | 64.2 (51.0)† | 66.7 (35.5)† | 53.6 (25.3)† | 0.002*   |
| Troponin I (> 0.03 ng/mL)             | 91 (39.1)    | 61 (33.0)    | 30 (62.5)    | < 0.001* |
| <b>Inflammatory markers</b>           |              |              |              |          |
| D-dimer (> 500 ng/mL)                 | 135 (80.4)   | 101 (75.4)   | 34 (100)     | < 0.001* |
| Ferritin (> 336 ng/mL)                | 109 (65.3)   | 78 (59.1)    | 31 (88.6)    | 0.001*   |
| Lactate dehydrogenase (> 200 U/L)     | 108 (73.0)   | 77 (67.0)    | 31 (93.9)    | 0.002*   |
| C-reactive protein (> 1 mg/dL)        | 152 (87.4)   | 115 (83.9)   | 37 (100)     | 0.005*   |
| Procalcitonin (> 0.25 ng/mL)          | 73 (47.1)    | 50 (41.7)    | 23 (65.7)    | 0.012*   |
| ST-T change on EKG                    | 84 (31.8)    | 63 (29.7)    | 21 (40.4)    | 0.139    |
| <b>Radiographic findings</b>          |              |              |              |          |
| Opacity/infiltrate                    | 209 (73.9)   | 162 (71.1)   | 47 (85.5)    | 0.029*   |
| Ground glass appearance               | 79 (27.9)    | 65 (28.5)    | 14 (25.5)    | 0.650    |
| Pleural effusion                      | 24 (8.5)     | 17 (7.5)     | 7 (12.7)     | 0.208    |
| Pulmonary congestion                  | 30 (10.6)    | 23 (10.1)    | 7 (12.7)     | 0.568    |
| <b>Oxygen therapy/delivery</b>        |              |              |              |          |
| Nasal cannula                         | 207 (73.1)   | 160 (70.2)   | 47 (85.5)    | 0.022*   |
| High-flow nasal cannula               | 36 (12.7)    | 18 (7.9)     | 18 (32.7)    | < 0.001* |
| NIPPV                                 | 28 (9.9)     | 10 (4.4)     | 18 (32.7)    | < 0.001* |
| Mechanical ventilation                | 58 (20.5)    | 25 (11.0)    | 33 (60.0)    | < 0.001* |
| <b>Intervention</b>                   |              |              |              |          |
| Intensive care unit                   | 89 (31.4)    | 47 (20.6)    | 42 (76.4)    | < 0.001* |
| ECMO                                  | 2 (0.7)      | 0 (0)        | 2 (3.6)      | 0.037*   |
| RRT                                   | 16 (5.7)     | 3 (1.3)      | 13 (23.6)    | < 0.001* |
| Vasopressor                           | 53 (18.7)    | 19 (8.3)     | 34 (61.8)    | < 0.001* |
| Antibiotics                           | 220 (77.7)   | 166 (72.8)   | 54 (98.2)    | < 0.001* |
| <b>Treatment</b>                      |              |              |              |          |
| Azithromycin                          | 182 (64.3)   | 139 (61.0)   | 43 (78.2)    | 0.017*   |
| Hydroxychloroquine                    | 67 (23.7)    | 45 (19.7)    | 22 (40.0)    | 0.002*   |
| Steroids                              | 46 (16.3)    | 26 (11.4)    | 20 (36.4)    | < 0.001* |
| Ascorbic acid                         | 57 (20.1)    | 38 (16.7)    | 19 (34.5)    | 0.003*   |
| Zinc                                  | 54 (19.1)    | 33 (14.5)    | 21 (38.2)    | < 0.001* |
| Tocilizumab                           | 12 (4.2)     | 6 (2.6)      | 6 (10.9)     | 0.006*   |

|                         |            |             |            |          |
|-------------------------|------------|-------------|------------|----------|
| Convalescent plasma     | 36 (12.7)  | 19 (8.3)    | 17 (30.9)  | < 0.001* |
| Remdesivir              | 25 (8.8)   | 20 (8.8)    | 5 (8.8)    | 0.940    |
| <b>Complications</b>    |            |             |            |          |
| Acute kidney injury     | 115 (40.6) | 75 (32.9)   | 40 (72.7)  | < 0.001* |
| ARDS                    | 53 (18.7)  | 17 (7.5)    | 36 (65.5)  | < 0.001* |
| Arrhythmias             | 31 (11.0)  | 18 (7.9)    | 13 (23.6)  | 0.001*   |
| QT prolongation         | 25 (8.8)   | 18 (7.9)    | 7 (12.7)   | 0.257    |
| Venous thromboembolism  | 10 (3.5)   | 8 (3.5)     | 2 (3.6)    | 1.000    |
| Arterial thrombosis     | 1 (0.4)    | 1 (0.4)     | 0 (0)      | 1.000    |
| Cerebrovascular event   | 3 (1.1)    | 3 (1.3)     | 0 (0)      | 1.000    |
| Myocardial infection    | 5 (1.8)    | 4 (1.8)     | 1 (1.8)    | 1.000    |
| Heart failure           | 16 (5.7)   | 11 (4.8)    | 5 (9.1)    | 0.219    |
| Superimposed bacteremia | 19 (6.7)   | 12 (5.3)    | 7 (12.7)   | 0.047*   |
| Hospital stay (day)     | 6.0 (7.0)‡ | 7.4 (7.53)† | 9.2 (7.7)† | 0.125    |
| <b>Outcome</b>          |            |             |            |          |
| Recovery/discharge      | 223 (78.8) |             |            |          |
| Remained hospitalized   | 2 (0.7)    |             |            |          |
| Death                   | 55 (19.4)  |             |            |          |

ALC, absolute lymphocyte count; ALT, alanine transaminase; ARDS, acute respiratory distress syndrome; BMI, body mass index; COPD, chronic obstructive pulmonary disease; ECMO, extra-corporeal membrane oxygenation; eGFR, estimated glomerular filtration rate; EKG, electrocardiography; IQR, interquartile range; NIPPV, non-invasive positive pressure ventilation; RRT, renal replacement therapy; SD, standard deviation; SpO<sub>2</sub>, oxygen saturation; UNL, upper normal limit; WBC, white blood cell.

\*statistically significant

†mean (standard deviation)

‡median (IQR)

**Table 2.** Clinical risk factors for overall in-hospital mortality using univariate binary logistic regression analysis.

| Characteristics                                     | Odds ratio | 95% CI       | P-value  |
|-----------------------------------------------------|------------|--------------|----------|
| Age (per 1-year increment)                          | 1.051      | 1.028-1.075  | < 0.001* |
| Hypertension                                        | 2.288      | 1.121-4.673  | 0.024*   |
| Chronic kidney disease                              | 2.262      | 1.195-4.274  | 0.012*   |
| Hypoxia (SpO <sub>2</sub> < 95%)                    | 5.181      | 2.242-11.905 | < 0.001* |
| Rales/crackles                                      | 2.101      | 1.080-4.098  | 0.029*   |
| Leukocytosis (WBC > 10,000 /uL)                     | 3.185      | 1.727-5.882  | < 0.001* |
| Respiratory acidosis                                | 7.463      | 3.546-15.625 | < 0.001* |
| Transaminitis (ALT > 3X UNL)                        | 2.538      | 1.160-5.556  | 0.020*   |
| eGFR (per 1.0 mL/min/1.73m <sup>2</sup> increment)† | 0.988      | 0.980-0.997  | 0.011*   |
| D-dimer (> 500 ng/mL)‡                              | -          | -            | -        |
| Ferritin (> 336 ng/mL)                              | 5.376      | 1.789-16.129 | 0.003*   |
| Lactate dehydrogenase (> 200 U/L)                   | 7.634      | 1.739-33.333 | 0.007*   |
| C-reactive protein (> 1 mg/dL)‡                     | -          | -            | -        |
| Procalcitonin (> 0.25 ng/mL)                        | 2.681      | 1.222-5.882  | 0.014*   |
| Troponin I (> 0.03 ng/mL)                           | 3.390      | 1.751-6.536  | < 0.001* |
| Opacity/infiltrate on imaging                       | 2.392      | 1.073-5.348  | 0.033*   |
| Nasal cannula                                       | 2.494      | 1.120-5.556  | 0.025*   |
| High-flow nasal cannula                             | 5.682      | 2.703-11.905 | < 0.001* |
| NIPPV                                               | 10.638     | 4.545-2.500  | < 0.001* |

|                         |        |               |          |
|-------------------------|--------|---------------|----------|
| Mechanical ventilation  | 12.195 | 6.173-23.810  | < 0.001* |
| ICU admission/transfer  | 12.500 | 6.173-25.000  | < 0.001* |
| ECMO‡                   | -      | -             | -        |
| RRT                     | 23.256 | 6.329-83.333  | < 0.001* |
| Vasopressor             | 17.857 | 8.696-37.037  | < 0.001* |
| Antibiotics             | 20.000 | 2.732-142.857 | 0.003*   |
| Azithromycin            | 2.294  | 1.147-4.587   | 0.019*   |
| Hydroxychloroquine      | 2.710  | 1.443-5.102   | 0.002*   |
| Steroids                | 4.444  | 2.237-8.772   | < 0.001* |
| Ascorbic acid           | 2.639  | 1.370-5.076   | 0.004*   |
| Zinc                    | 3.650  | 1.898-7.042   | < 0.001* |
| Tocilizumab             | 4.525  | 1.403-14.706  | 0.012*   |
| Convalescent plasma     | 4.921  | 2.348-10.314  | < 0.001* |
| Acute kidney injury     | 5.435  | 2.825-10.417  | < 0.001* |
| ARDS                    | 23.256 | 11.236-50.000 | < 0.001* |
| Arrhythmia              | 3.610  | 1.645-7.937   | 0.001*   |
| Superimposed bacteremia | 2.625  | 0.982-6.993   | 0.054    |

ARDS, acute respiratory distress syndrome; BMI, body mass index; CI, confidence interval; ICU, intensive care unit; RRT, renal replacement therapy.

\*statistically significant

†on admission

‡analyses cannot be performed as at least one cell is zero

**Table 3.** Clinical predictors for overall in-hospital mortality using multivariate binary logistic regression analysis.

| Characteristics                                     | Statistics |              |          |
|-----------------------------------------------------|------------|--------------|----------|
|                                                     | Odds ratio | 95% CI       | P-value  |
| <b>Model 1</b>                                      |            |              |          |
| Age (per 1-year increment)                          | 1.075      | 1.045-1.105  | < 0.001* |
| Hypertension                                        | 1.264      | 0.572-2.793  | 0.562    |
| Chronic kidney disease                              | 1.232      | 0.590-2.571  | 0.578    |
| Hypoxia (SpO <sub>2</sub> < 95%)                    | 4.630      | 1.934-1.111  | 0.001*   |
| Rales/crackles                                      | 2.016      | 0.955-4.255  | 0.066    |
| Leukocytosis (WBC > 10,000 /uL)                     | 2.732      | 1.412-5.263  | 0.003*   |
| Transaminitis (ALT > 3X UNL)                        | 2.137      | 0.890-5.128  | 0.089    |
| eGFR (per 1.0 mL/min/1.73m <sup>2</sup> decrement)† | 1.002      | 0.990-1.013  | 0.795    |
| Ferritin (> 336 ng/mL)                              | 4.016      | 1.195-13.514 | 0.025*   |
| Lactate dehydrogenase (> 200 U/L)                   | 7.752      | 1.639-37.037 | 0.010*   |
| Procalcitonin (> 0.25 ng/mL)                        | 2.404      | 1.011-5.714  | 0.047*   |
| Troponin I (> 0.03 ng/mL)                           | 2.242      | 1.080-4.673  | 0.030*   |
| Opacity/infiltrate on imaging                       | 3.077      | 1.276-7.407  | 0.012*   |
| Nasal cannula                                       | 1.883      | 0.799-4.444  | 0.148    |
| High-flow nasal cannula                             | 4.608      | 2.053-10.309 | < 0.001* |
| NIPPV                                               | 7.246      | 2.899-18.182 | < 0.001* |

|                              |        |               |          |
|------------------------------|--------|---------------|----------|
| Mechanical ventilation       | 13.889 | 6.211-31.250  | < 0.001* |
| ICU admission/transfer       | 13.699 | 6.135-30.303  | < 0.001* |
| RRT                          | 21.277 | 5.025-90.909  | < 0.001* |
| Vasopressor                  | 22.222 | 9.434-52.632  | < 0.001* |
| Antibiotics                  | 17.544 | 2.309-125.000 | 0.006*   |
| ARDS                         | 23.810 | 10.204-55.556 | < 0.001* |
| Superimposed bacteremia      | 2.041  | 0.645-6.452   | 0.224    |
| <b>Model 2</b>               |        |               |          |
| Azithromycin                 | 2.058  | 0.918-4.608   | 0.080    |
| Hydroxychloroquine           | 2.165  | 1.052-4.444   | 0.036*   |
| Ascorbic acid                | 2.101  | 1.007-4.386   | 0.048*   |
| Zinc                         | 3.425  | 1.629-7.194   | 0.001*   |
| Tocilizumab                  | 3.279  | 0.911-11.765  | 0.069    |
| Convalescent plasma          | 3.534  | 1.527-8.130   | 0.003*   |
| <b>Model 3</b>               |        |               |          |
| Respiratory acidosis         | 7.042  | 2.915-16.949  | < 0.001* |
| Steroids therapy             | 2.825  | 1.305-6.098   | 0.008*   |
| <b>Model 4</b>               |        |               |          |
| Acute kidney injury          | 3.571  | 1.715-7.407   | 0.001*   |
| <b>Model 5</b>               |        |               |          |
| Arrhythmias as complications | 2.494  | 1.002-6.211   | 0.050*   |

ARDS, acute respiratory distress syndrome; CAD, coronary artery disease; CKD, chronic kidney disease; CI, confidence interval; COPD, chronic obstructive pulmonary disease; eGFR, estimated glomerular filtration rate; ICU, intensive care unit; NIPPV, non-invasive positive pressure ventilation; RRT, renal replacement therapy.

\*statistically significant

Model 1 is adjusted for age, sex, ethnicity and obesity

Model 2 is adjusted for age, sex, ethnicity, obesity and need for oxygen therapy

Model 3 is adjusted for age, sex, ethnicity, obesity, asthma/COPD and need for oxygen therapy

Model 4 is adjusted for age, sex, ethnicity, obesity, CKD and need for oxygen therapy

Model 5 is adjusted for age, sex, ethnicity, obesity, CAD, heart failure and history of arrhythmia/conduction disorder

**Table 4.** Demographics and baseline characteristics of critically ill patients (n = 89).

| Characteristics      | All patients<br>(n = 89) | Survivors<br>(n = 47)    | Non-survivors<br>(n = 42) | P-value |
|----------------------|--------------------------|--------------------------|---------------------------|---------|
| Male                 | 61 (68.5)                | 30 (63.8)                | 31 (73.8)                 | 0.365   |
| Age (year)           | 66.0 (14.2) <sup>†</sup> | 69.1 (12.5) <sup>†</sup> | 63.3 (15.2) <sup>†</sup>  | 0.052   |
| <i>Ethnicity</i>     |                          |                          |                           |         |
| Caucasian            | 47 (52.8)                | 25 (53.2)                | 22 (52.4)                 | 0.685   |
| African-American     | 25 (28.1)                | 12 (25.5)                | 13 (31.0)                 |         |
| Hispanic/Latino      | 12 (13.5)                | 8 (17.0)                 | 4 (9.5)                   |         |
| Asian                | 5 (5.6)                  | 2 (4.3)                  | 3 (7.1)                   |         |
| Others               | -                        | -                        | -                         |         |
| <i>Treatment</i>     |                          |                          |                           |         |
| Azithromycin         | 69 (77.5)                | 34 (72.3)                | 35 (83.3)                 | 0.215   |
| Hydroxychloroquine   | 42 (47.2)                | 23 (48.9)                | 19 (45.2)                 | 0.727   |
| Steroids             | 39 (43.8)                | 19 (40.4)                | 20 (47.6)                 | 0.495   |
| Ascorbic acid        | 39 (43.8)                | 22 (46.8)                | 17 (40.5)                 | 0.548   |
| Zinc                 | 40 (44.9)                | 21 (44.7)                | 19 (45.2)                 | 0.958   |
| Tocilizumab          | 11 (12.4)                | 5 (10.6)                 | 6 (14.3)                  | 0.750   |
| Convalescent plasma  | 30 (33.7)                | 14 (29.8)                | 16 (38.1)                 | 0.408   |
| Remdesivir           | 11 (12.4)                | 6 (12.8)                 | 5 (11.9)                  | 1.000   |
| <i>Complications</i> |                          |                          |                           |         |
| Acute kidney injury  | 56 (62.9)                | 22 (46.8)                | 34 (81.0)                 | 0.001*  |

|                        |             |             |              |          |
|------------------------|-------------|-------------|--------------|----------|
| ARDS                   | 47 (52.8)   | 15 (31.9)   | 32 (76.2)    | < 0.001* |
| Arrhythmias            | 21 (23.6)   | 10 (21.3)   | 11 (26.2)    | 0.586    |
| QT prolongation        | 16 (18.0)   | 10 (21.3)   | 6 (14.3)     | 0.391    |
| Venous thromboembolism | 5 (5.6)     | 3 (6.4)     | 2 (4.8)      | 1.000    |
| Hospital stay (day)    | 13.1 (9.6)† | 10.4 (8.1)† | 15.5 (10.3)† | 0.125    |
| <b>Outcome</b>         |             |             |              |          |
| Recovery/discharge     | 43 (48.3)   |             |              |          |
| Remained hospitalized  | 2 (2.2)     |             |              |          |
| Death                  | 42 (47.2)   |             |              |          |

ARDS, acute respiratory distress syndrome.

\*statistically significant

†mean (standard deviation)



1  
2  
3  
4  
5  
6  
7  
8  
9  
10  
11  
12  
13  
14  
15  
16  
17  
18  
19  
20  
21  
22  
23  
24  
25  
26  
27  
28  
29  
30  
31  
32  
33  
34  
35  
36  
37  
38  
39  
40  
41  
42  
43  
44  
45  
46  
47  
48  
49  
50  
51  
52  
53  
54  
55  
56  
57  
58  
59  
60

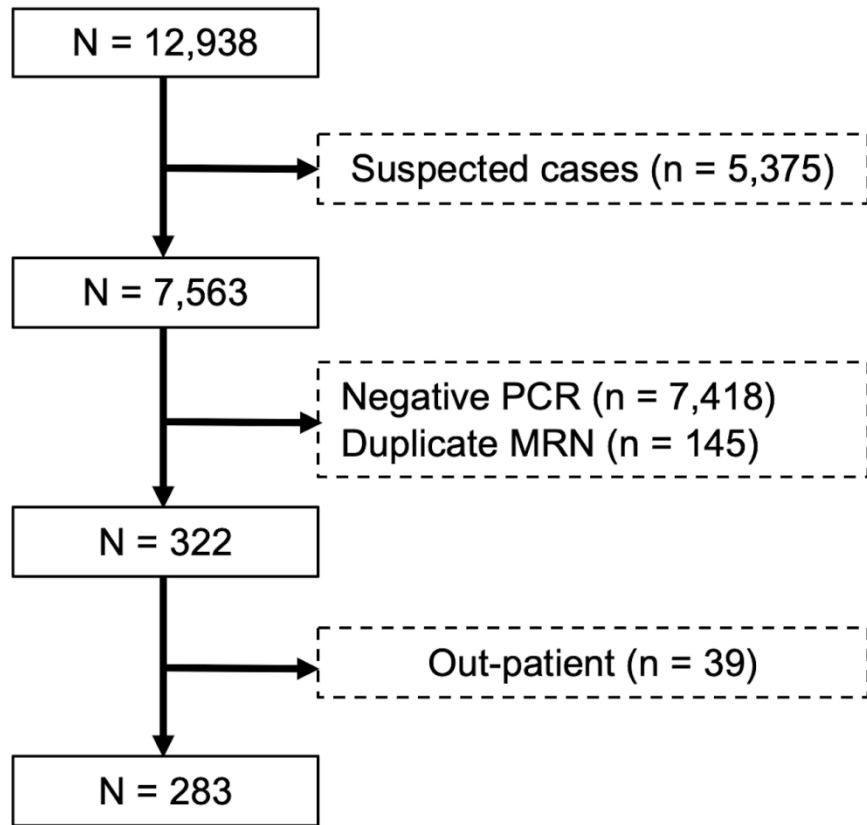

Figure 1. Flowchart of subject selection from UPMC Pinnacle COVID-19 registry from March 1 to May 31, 2020.

127x117mm (300 x 300 DPI)

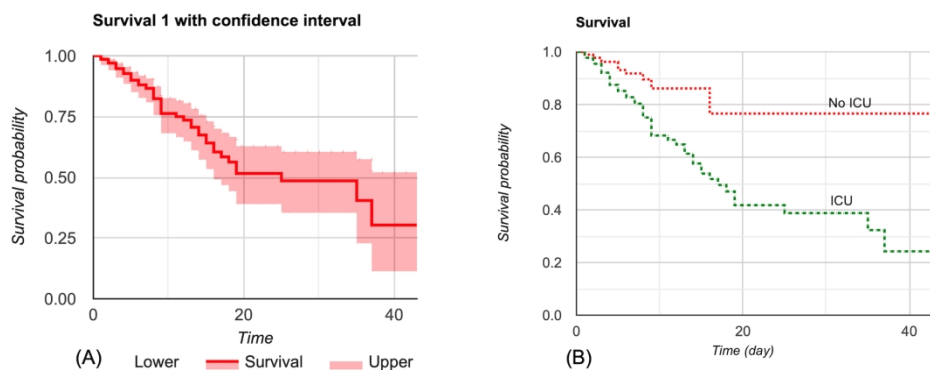

Figure 2. Survival analysis by Kaplan-Meier curves. A) The cumulative survival declined with increasing length of hospital stay. The median survival time was 25 days with standard error (SE) of 7.0. B) ICU patients significantly lower survival probability with mean survival time of 22.3 days (SE 1.8) and 23.0 (SE 1.3) in ICU group vs. non-ICU group, respectively ( $p = 0.002$ ).

203x81mm (300 x 300 DPI)

**Data collection (con't):**

The demographic data included age, sex, and ethnicity. Co-morbidities included current/prior history of smoking, obesity (BMI  $\geq 30$  kg/m<sup>2</sup>), hypertension, diabetes mellitus, hyperlipidemia, coronary artery disease, heart failure/cardiomyopathy, arrhythmia, chronic kidney disease, end-stage kidney disease (ESKD), asthma/chronic pulmonary obstructive disease, and cerebrovascular diseases.

Laboratory findings were recorded: leukocytosis (white blood cells count  $> 9,500/\mu\text{L}$ ), leukopenia (white blood cells count  $< 3,900/\mu\text{L}$ ), lymphocytopenia (absolute lymphocytes count  $< 600/\mu\text{L}$ ), thrombocytosis (platelets  $> 400,000/\mu\text{L}$ ), and thrombocytopenia (platelets  $< 140,000/\mu\text{L}$ ), respiratory acidosis (arterial pH  $< 7.35$  and arterial partial pressure of CO<sub>2</sub>  $> 45$  mmHg), transaminitis (alanine transaminase  $> 3$  times of upper normal limit). Serum creatinine (mg/dL) was measured by enzymatic assay. Elevation of serum D-dimer ( $> 500$  ng/mL), ferritin ( $> 336$  ng/mL) lactate dehydrogenase (LDH;  $> 200$  U/L), C-reactive protein ( $> 1$  mg/dL), procalcitonin ( $> 0.25$  ng/mL), and troponin I ( $> 0.03$  ng/mL) were recorded.

# BMJ Open

## Clinical Characteristics of Hospitalized COVID-19 Patients and the Impact on Mortality: A Single-network, Retrospective Cohort Study from Pennsylvania State

|                                 |                                                                                                                                                                                                                                                                                     |
|---------------------------------|-------------------------------------------------------------------------------------------------------------------------------------------------------------------------------------------------------------------------------------------------------------------------------------|
| Journal:                        | <i>BMJ Open</i>                                                                                                                                                                                                                                                                     |
| Manuscript ID                   | bmjopen-2020-042549.R1                                                                                                                                                                                                                                                              |
| Article Type:                   | Original research                                                                                                                                                                                                                                                                   |
| Date Submitted by the Author:   | 02-Sep-2020                                                                                                                                                                                                                                                                         |
| Complete List of Authors:       | Gadhiya, Kinjal; UPMC Pinnacle, Department of Internal Medicine<br>Hansrivijit, Panupong ; UPMC Pinnacle, Department of Internal Medicine<br>Gangireddy, Mounika; UPMC Pinnacle, Department of Internal Medicine<br>Goldman, John; UPMC Pinnacle, Department of Infectious Diseases |
| <b>Primary Subject Heading</b>: | Infectious diseases                                                                                                                                                                                                                                                                 |
| Secondary Subject Heading:      | Intensive care                                                                                                                                                                                                                                                                      |
| Keywords:                       | Adult intensive & critical care < INTENSIVE & CRITICAL CARE, INTERNAL MEDICINE, MICROBIOLOGY                                                                                                                                                                                        |
|                                 |                                                                                                                                                                                                                                                                                     |

SCHOLARONE™  
Manuscripts



I, the Submitting Author has the right to grant and does grant on behalf of all authors of the Work (as defined in the below author licence), an exclusive licence and/or a non-exclusive licence for contributions from authors who are: i) UK Crown employees; ii) where BMJ has agreed a CC-BY licence shall apply, and/or iii) in accordance with the terms applicable for US Federal Government officers or employees acting as part of their official duties; on a worldwide, perpetual, irrevocable, royalty-free basis to BMJ Publishing Group Ltd ("BMJ") its licensees and where the relevant Journal is co-owned by BMJ to the co-owners of the Journal, to publish the Work in this journal and any other BMJ products and to exploit all rights, as set out in our [licence](#).

The Submitting Author accepts and understands that any supply made under these terms is made by BMJ to the Submitting Author unless you are acting as an employee on behalf of your employer or a postgraduate student of an affiliated institution which is paying any applicable article publishing charge ("APC") for Open Access articles. Where the Submitting Author wishes to make the Work available on an Open Access basis (and intends to pay the relevant APC), the terms of reuse of such Open Access shall be governed by a Creative Commons licence – details of these licences and which [Creative Commons](#) licence will apply to this Work are set out in our licence referred to above.

Other than as permitted in any relevant BMJ Author's Self Archiving Policies, I confirm this Work has not been accepted for publication elsewhere, is not being considered for publication elsewhere and does not duplicate material already published. I confirm all authors consent to publication of this Work and authorise the granting of this licence.

1  
2  
3 **1 Clinical Characteristics of Hospitalized COVID-19 Patients and the Impact on Mortality:**  
4  
5 **2 A Single-network, Retrospective Cohort Study from Pennsylvania State**  
6

7  
8 3 Kinjal P. Gadhiya,<sup>1\*</sup> Panupong Hansrivijit,<sup>1\*</sup> Mounika Gangireddy,<sup>1\*</sup> John D. Goldman<sup>2</sup>  
9

10 4 \*equivalent contribution  
11

12 5 <sup>1</sup>Department of Internal Medicine, UPMC Pinnacle, Harrisburg, PA 17104, USA;  
13

14 6 [kinjal268@gmail.com](mailto:kinjal268@gmail.com); [hansrivijitp@upmc.edu](mailto:hansrivijitp@upmc.edu); [g.mounikareddy07@gmail.com](mailto:g.mounikareddy07@gmail.com)  
15

16 7 <sup>2</sup>Department of Infectious Diseases, UPMC Pinnacle, Harrisburg, PA 17104, USA;  
17

18 8 [goldmanjd@upmc.edu](mailto:goldmanjd@upmc.edu)  
19  
20

21 9 **Running title:** COVID-19 and Clinical Impact: A Retrospective Study from Pennsylvania State  
22  
23

24 10 **Correspondence**  
25

26 11 Panupong Hansrivijit, M.D.  
27

28 12 205 South Front Street, Suite 3C  
29

30 13 Harrisburg, PA 17104  
31

32 14 [hansrivijitp@upmc.edu](mailto:hansrivijitp@upmc.edu)  
33  
34

35 15 **Keywords:** COVID-19, coronavirus, SARS-CoV-2, mortality, acute kidney injury  
36

37 16 **Word count:** 3,721 (excl. title page, abstract, legend, declarations, and references)  
38  
39

40 17 **Funding:** None declared.  
41

42 18 **Disclosure of Potential Conflicts of Interest:** The authors declared no potential conflicts of  
43  
44  
45 19 interest.  
46

47 20  
48

49 21  
50

51 22  
52

53 23  
54  
55  
56  
57  
58  
59  
60

1  
2  
3 **24 ABSTRACT**  
4

5 **25 Objective:** Coronavirus Disease 2019 (COVID-19) is a respiratory disease caused by severe  
6  
7  
8 **26** acute respiratory syndrome coronavirus-2 (SARS-CoV-2) with highest burden in the United  
9  
10  
11 **27** States. Data on clinical characteristics of COVID-19 patients in U.S. population are limited.  
12  
13 **28** Thus, we aim to determine the clinical characteristics and risk factors for in-hospital mortality  
14  
15 **29** from COVID-19.

16  
17 **30 Design:** Retrospective observational study.

18  
19 **31 Setting:** Single-network hospitals in Pennsylvania state.

20  
21 **32 Participants:** Patients with confirmed SARS-CoV-2 infection who were hospitalized from  
22  
23  
24 **33** March 1<sup>st</sup> to May 31<sup>st</sup>, 2020.

25  
26 **34 Primary and secondary outcome measures:** Primary outcome was in-hospital mortality.  
27  
28  
29 **35** Secondary outcomes were complications, such as acute kidney injury and acute respiratory  
30  
31 **36** distress syndrome (ARDS).

32  
33 **37 Results:** Of 283 patients, 19.4% were non-survivors. The mean age of all patients was  $64.1 \pm$   
34  
35 **38** 15.9 years. 56.2% were male and 50.2% were white. In adjusted multivariate analyses,  
36  
37  
38 **39** increasing age (per 1-year increment; OR 1.075), hypoxia (SpO<sub>2</sub> < 95%; OR 4.630),  
39  
40 **40** opacity/infiltrate on imaging (OR 3.077), leukocytosis (WBC > 10,000 /uL; OR 2.732), ferritin >  
41  
42 **41** 336 ng/mL (OR 4.016), lactate dehydrogenase > 200 U/L (OR 7.752), procalcitonin > 0.25  
43  
44 **42** ng/mL (OR 2.404), troponin I > 0.03 ng/mL (OR 2.242), need for advanced oxygen support  
45  
46  
47 **43** other than simple nasal cannula (OR 4.608-13.889), ICU admission/transfer (OR 13.699), renal  
48  
49 **44** replacement therapy (OR 21.277), need for vasopressor (OR 22.222), acute respiratory distress  
50  
51 **45** syndrome (OR 23.810), respiratory acidosis (OR 7.042), and acute kidney injury (OR 3.571).  
52  
53  
54  
55  
56  
57  
58  
59  
60

1  
2  
3 46 When critically ill patients were analyzed independently, increasing SOFA score (OR 1.544),  
4  
5 47 AKI (OR 2.128), and ARDS (OR 6.410) were predictive of in-hospital mortality.  
6  
7

8 48 **Conclusion:** We reported the characteristics of ethnically diverse, hospitalized patients with  
9  
10 49 COVID-19 from Pennsylvania state.  
11  
12  
13 50  
14  
15 51

## 17 52 **Strengths and Limitations of This Study**

- 19 53 - Individual patient's chart was reviewed.
  - 21 54 - Multivariate analysis (binary logistic regression model) was used to report the results.
  - 23 55 - Retrospective, observational design.
  - 25 56 - Limited sample size.
  - 27 57 - Only hospitalized patients were included in the studies.
- 30  
31 58  
32  
33 59  
34  
35 60  
36  
37  
38 61  
39  
40 62  
41  
42 63  
43  
44 64  
45  
46  
47 65  
48  
49 66  
50  
51 67  
52  
53  
54 68  
55  
56  
57  
58  
59  
60



69

70

## 71 INTRODUCTION

72           Coronavirus Disease 2019 (COVID-19) is a respiratory disease caused by Severe Acute  
73 Respiratory Syndrome Coronavirus-2 (SARS-CoV-2) which has become a pandemic in early  
74 2020. The spread of this virus was originally started in Wuhan, China in December 2019 and  
75 rapidly escalated to 216 countries within five months with the highest number of infected cases  
76 in the United States.<sup>1</sup> As of August 29<sup>th</sup>, 2020, the reported cumulated number of confirmed  
77 cases in the United States was close to 6 million with a mortality rate of 3.09%.<sup>1</sup>

78           As of August 29<sup>th</sup>, 2020, the Pennsylvania Department of Health has announced more  
79 than 129,056 confirmed cases of COVID-19 leading to 7,671 deaths, making Pennsylvania the  
80 13<sup>th</sup> state with the highest confirmed cases.<sup>2</sup> To date, the characteristics of infected patients in the  
81 United States were reported in the state of Washington (n = 21), California (n = 1,299) and New  
82 York (n = 5,700) in chronological order.<sup>3-5</sup> The mortality across the U.S. studies ranged from 6.3  
83 to 24%, depending on the severity of COVID-19. Although the characteristics of hospitalized  
84 COVID-19 patients have been reported in other states, there are some limitations that preclude  
85 the generalization of the results toward our patient population. Studies from Washington and  
86 California were conducted in pre-remdesivir era and multivariate analysis was not performed in  
87 the New York City cohort. The association between clinical characteristics and in-hospital  
88 mortality in the U.S. population have not been clearly established.

89           Guan, et al first described the clinical characteristics of 1,099 patients infected with  
90 SARS-CoV-2 across China.<sup>6</sup> In this study, the overall mortality was 1.4%. However, the  
91 association between clinical risk factors and mortality was not described. Later Du et al and

1  
2  
3 92 Zhou et al demonstrated that older age, higher Sequential Organ Failure Assessment (SOFA)  
4  
5 93 score, D-dimer > 1 µg/mL, cardiac troponin I ≥ 0.05 ng/mL, and pre-existing concurrent  
6  
7  
8 94 cardiovascular and cerebrovascular diseases were significant predictors for increased mortality  
9  
10 95 from COVID-19.<sup>7 8</sup> However, these findings were primarily based on Chinese population; thus, it  
11  
12 96 has been unconfirmed if the results can be applicable to other patient populations.

13  
14  
15 97 Clinical management of COVID-19 has been dynamic and variable based on available  
16  
17 98 research, which has largely been *in vitro*, such as a combination of hydroxychloroquine and  
18  
19 99 azithromycin,<sup>9</sup> ascorbic acid,<sup>10</sup> ivermectin,<sup>11</sup> and zinc.<sup>12</sup> These therapies have not been proven  
20  
21  
22 100 beneficial in clinical studies. In the current study, we provide our experience on treatment options  
23  
24 101 for patients infected with SARS-CoV-2.

25  
26 102 In this retrospective cohort, we aimed to demonstrate the clinical characteristics of COVID-  
27  
28 103 19 patients, treatment outcomes and the impact on in-hospital mortality in an ethnically diverse  
29  
30  
31 104 population.

32  
33 105

## 34 35 106 **MATERIALS AND METHODS**

### 36 37 107 ***Study design***

38  
39  
40 108 This is a retrospective cohort study from seven hospitals under UPMC Pinnacle network  
41  
42 109 located across the state of Pennsylvania. The protocol of this study has been approved by UPMC  
43  
44  
45 110 Pinnacle Institutional Review Board and UPMC Pinnacle Ethic Committee (#20E024). Written  
46  
47 111 informed consent was waived due to the retrospective, observational nature of the study. Our  
48  
49 112 current study followed the Declaration of Helsinki.

### 50 51 113 ***Patient and public involvement***

52  
53  
54 114 No patient involvement.

### 115 ***Data source and patient population***

116 Data were collected by extracting electronic medical records from March 1<sup>st</sup> to May 31<sup>th</sup>,  
117 2020 through UPMC Pinnacle COVID-19 registry. Adult patients with age  $\geq 18$  years who were  
118 hospitalized with confirmed SARS-CoV-2 infection by real-time polymerase chain reaction (RT-  
119 PCR) from nasopharyngeal swab were included in this study. We excluded non-hospitalized  
120 patients, patients  $< 18$  years of age, presumed SARS-CoV-2 infection, pregnant women, out-of-  
121 system transfer and patients enrolled in clinical trials. Transfer within the system was considered  
122 one admission. For patients with multiple admissions with study period, the first admission for  
123 COVID-19 was reviewed.

### 124 ***Data collection***

125 Individual patient charts were reviewed by three independent authors to prevent observer  
126 bias. Collected data was divided into: demographics, comorbidities, signs and symptoms,  
127 laboratory findings, radiographic findings, treatments/interventions, complications and outcomes.  
128 *Supplemental Documents 1* summarizes the description of each variable in our cohort as well as  
129 the cutoff values for each variable.

130 The Sequential Organ failure Assessment (SOFA) score<sup>13</sup> was calculated on the first day  
131 of ICU admission. Estimated glomerular filtration rate (eGFR) was calculated using CKD-EPI  
132 equation.<sup>14</sup> Acute kidney injury (AKI) was defined by an increase in serum creatinine by 0.3 mg/dL  
133 (27  $\mu\text{mol/L}$ ) or  $\geq 1.5$  times from the baseline value within 48 hours.<sup>15</sup> Chronic kidney disease  
134 (CKD) was defined by the Kidney Diseases Improving Global Outcomes guidelines.<sup>16</sup> Patients  
135 with history of end stage kidney disease (ESKD) on dialysis prior to admission, were not counted  
136 toward 'requirement of renal replacement therapy (RRT)/hemodialysis (HD)' during the hospital  
137 stay. Acute respiratory distress syndrome (ARDS) was defined by the Berlin criteria.<sup>17</sup>

1  
2  
3 138 Arrhythmias as complications were defined either tachy- or bradyarrhythmia that were new-onset,  
4  
5 139 occurred during hospitalization with COVID-19. In this study, prolongation of QT segment was  
6  
7 140 defined as the QT duration > 500 milliseconds.

#### 10 141 ***Study outcomes***

12 142 The primary outcome was in-hospital mortality. The secondary outcome included  
13  
14 143 treatment outcomes and complications such as recovery/discharge, AKI, ARDS, arrhythmias, QT  
15  
16 144 prolongation, venous thromboembolism, arterial thrombosis, cerebrovascular events, heart  
17  
18 145 failure, and myocardial infarction.

#### 21 146 ***Statistical analysis***

23 147 All analyses were conducted using SPSS software version 23.0 (IBM Corp., Armonk,  
24  
25 148 NY, USA). Descriptive analyses were reported in percentage for categorical data and in mean  $\pm$   
26  
27 149 standard deviation (S.D.) or median (interquartile range; IQR) depending the data distribution.  
28  
29 150 Comparisons of outcomes for each variable were evaluated using Pearson's  $\chi^2$  tests or Fisher-  
30  
31 151 Exact tests (for categorical data) and two-sample independent t-test (for continuous data). Fisher-  
32  
33 152 Exact tests were opted if the total sample in any cell count was less than five. A p-value less than  
34  
35 153 0.05 is considered statistically significant. Missing data were not included in the analysis.

#### 40 154 ***Logistic regression analysis***

42 155 Clinical risk factors that were significant from standard analyses (Pearson's  $\chi^2$  tests, Fisher-  
43  
44 156 Exact tests, t-tests) were included in univariate binary logistic regression analysis. Odds ratios  
45  
46 157 (OR) were reported along with 95% confidence interval (CI). The analysis is considered  
47  
48 158 statistically significant if the 95% CI crosses 1.0.<sup>18</sup> Variables that remained statistically significant  
49  
50 159 on univariate analysis were included in multivariate analysis using logistic regression method to  
51  
52 160 adjust for other covariates. For the analyses of overall mortality predictors, Model 1 was adjusted

1  
2  
3 161 for age, sex, ethnicity and obesity. Model 2 was adjusted for age, sex, ethnicity, obesity and need  
4  
5 162 for oxygen therapy. Model 3 is adjusted for age, sex, ethnicity, obesity, asthma/chronic obstructive  
6  
7 163 pulmonary disease (COPD), the need for oxygen therapy, and ICU admission. Model 4 is adjusted  
8  
9 164 for age, sex, ethnicity, obesity, CKD, the need for oxygen therapy, and ICU admission. Model 5  
10  
11 165 is adjusted for age, sex, ethnicity, obesity, coronary artery disease, heart failure, history of  
12  
13 166 arrhythmia/conduction disorder, and ICU admission. The rationale for each Model adjustment in  
14  
15 167 multivariate analysis is available in *Supplemental Document 2*.

### 19 168 ***Sensitivity analysis***

21 169 The goodness-of-fit tests of logistic regression analyses were evaluated by Hosmer-  
22  
23 170 Lemeshow method. The validity and sustainability of the significant results from multivariate  
24  
25 171 analysis were tested using the bootstrap method to estimate the end point with imputed sample  
26  
27 172 size of 1,000.

### 31 173 ***Survival analysis***

33 174 Kaplan-Meier analysis was used to present the survival by plotting between cumulative  
34  
35 175 survival against hospital stay in all included patients and in patients requiring ICU.

## 40 177 **RESULTS**

### 42 178 ***Baseline characteristics and patient outcomes***

44 179 A total of 12,938 patients were identified during the study period. Thirty-nine patients were  
45  
46 180 outpatient and did not require hospitalization. After excluding patients with negative PCR (n =  
47  
48 181 7,374), duplicate medical records (n = 145), pregnant woman (n = 3), and clinical trial patients (n  
49  
50 182 = 2), 283 patients were included for further analysis. The flowchart of data selection from the  
51  
52 183 UPMC Pinnacle COVID-19 registry is depicted in *Figure 1*. *Table 1* summarizes the demographics

1  
2  
3 184 and baseline characteristics of included patients. All patients had confirmed SARS-Cov-2 infection  
4  
5 185 by RT-PCR. Of 283 patients, 80.6% were survivors and 19.4% were non-survivors. The mean age  
6  
7 186 of all patients was  $64.1 \pm 15.9$  years. 56.2% were male and 50.2% were Caucasian. Non-survivors  
8  
9  
10 187 were significantly older and had higher proportion of hypertension, CKD and had lower mean  
11  
12 188 eGFR. Moreover, hypoxia on presentation, rales/crackles on physical examination, leukocytosis,  
13  
14 189 lymphocytopenia, respiratory acidosis, transaminitis, and opacity/infiltrate on imaging were  
15  
16 190 common presentations in non-survivors. Higher inflammatory markers, such as D-dimer, ferritin,  
17  
18 191 lactate dehydrogenase (LDH), C-reactive protein, and procalcitonin were significantly prevalent  
19  
20 192 in deceased patients. The need for oxygen therapy regardless of the mode of oxygen delivery was  
21  
22 193 higher among those who did not survive. Furthermore, non-survivors were more likely to have  
23  
24 194 received intensive care unit (ICU) admission/transfer, extracorporeal membrane oxygenation  
25  
26 195 (ECMO), RRT, use of vasopressors, use of antibiotics, azithromycin, hydroxychloroquine,  
27  
28 196 steroids, ascorbic acid, zinc, tocilizumab and convalescent plasma. Of overall complications, the  
29  
30 197 prevalence of AKI, ARDS, arrhythmias and superimposed bacteremia was significantly higher in  
31  
32 198 non-survivors. There was no significant difference in mean hospital stay between survivors and  
33  
34 199 non-survivors. Up to 78.8% recovered or were discharged from the hospital. Only two patients  
35  
36 200 remained hospitalized as of June 18, 2020. The mean hospital stay was similar between patients  
37  
38 201 who received remdesivir vs. those who did not ( $9.0 \pm 4.7$  and  $7.6 \pm 7.8$  days, respectively;  $p =$   
39  
40 202  $0.359$ ). In contrast, patients who received tocilizumab had significantly longer hospital stay  
41  
42 203 compared to those who did not receive tocilizumab ( $15.3 \pm 11.7$  and  $7.4 \pm 7.2$  days, respectively;  
43  
44 204  $p < 0.001$ ).

### 205 *Univariate analysis*

206 All factors except superimposed bacteremia remained significant on univariate analysis.  
207 The OR of each clinical predictor for overall in-hospital mortality is depicted in *Table 2*. Logistic  
208 regression analysis cannot be performed on the following variables: D-dimer (> 500 ng/mL), C-  
209 reactive protein (> 1 mg/dL), and the need for ECMO as at least one cell count was zero.  
210 Moreover, in a univariate analysis, we found that hydroxychloroquine treatment was associated  
211 with increased risk of QT prolongation (OR 3.401; 95%CI 1.473-7.874; p = 0.002).

### 212 ***Multivariate analysis***

213 Variables that were significant on univariate analysis were included in multivariate logistic  
214 regression analysis (*Table 3*). In Model 1 (adjusted for age, sex, ethnicity, and obesity), increasing  
215 patient age, hypoxia, opacity/infiltrate on imaging, leukocytosis, ferritin > 336 ng/mL, LDH (>  
216 200 U/L), procalcitonin > 0.25 ng/mL, troponin I > 0.03 ng/mL, use of high-flow oxygen nasal  
217 cannula, non-invasive positive pressure ventilation (NIPPV), mechanical ventilation, ICU  
218 admission/transfer, RRT, vasopressor, antibiotics and ARDS were independent risk factors for  
219 increased in-hospital mortality. In Model 2 (adjusted for all variables in Model 1 plus the need for  
220 oxygen therapy, and ICU admission), hydroxychloroquine, ascorbic acid, zinc, and convalescent  
221 plasma were not associated with increased mortality. In Model 3 (adjusted for all variables in  
222 Model 2 plus asthma/COPD), respiratory acidosis was associated with increased mortality.  
223 Moreover, AKI was an independent risk factor for in-hospital mortality from COVID-19 from  
224 Model 4. In addition, we also found that hydroxychloroquine therapy was associated with QT  
225 prolongation (OR 2.874; 95% CI 1.189-6.944; p = 0.019) after adjusted for covariates in Model 2.  
226 The association of these variables and overall mortality remained significant on bootstrap analysis  
227 when the sample size was imputed to 1,000.

### 228 ***Cohort of critically ill patients***

1  
2  
3 229 A total 89 patients required intensive care during the study period. Of which, 47.2% died.  
4  
5 230 The demographics and clinical characteristics of critically ill patients are demonstrated in *Table*  
6  
7 231 4. Deceased ICU patients had significantly higher proportion of AKI and ARDS compared to  
8  
9 232 survived ICU patients. The treatments were similar between survivors and non-survivor patients.  
10  
11 233 In multivariate analysis, each 1-point increment of SOFA score was associated with increased  
12  
13 234 death (OR 1.544; 95% CI 1.168-2.039; p 0.002) after adjusted for age, sex, and ethnicity.  
14  
15 235 Similarly, AKI (OR 2.128, 95% CI 1.111-6.667; p = 0.034) and ARDS (OR 6.410; 95% CI  
16  
17 236 2.237-18.182; p = 0.023) are significantly predictive of in-hospital mortality among patients  
18  
19 237 admitted the ICU after adjusted for age, sex, ethnicity, and SOFA score.  
20  
21  
22  
23

### 24 238 *Survival analysis*

25  
26 239 Survival analyses were evaluated using Kaplan-Meier curve (*Figure 2*). In our analysis,  
27  
28 240 the cumulative survival declined with increasing length of hospital stay. The median survival  
29  
30 241 time was 25.0 days with standard error of 7.0.  
31  
32

## 33 242

### 35 243 **DISCUSSION**

36  
37 244 In this single-network, retrospective observation study, we found that the overall in-  
38  
39 245 hospital mortality among hospitalized COVID-19 patients was 19.4%. The reported mortality  
40  
41 246 among Chinese cohorts ranged from 11.7% to 28.2%.<sup>7 8 19</sup> However, our reported mortality rates  
42  
43 247 appeared slightly lower than what previously described from New York City.<sup>5</sup> Richardson et al  
44  
45 248 found that the overall mortality of 5,700 hospitalized COVID-19 patients from 12 hospitals in  
46  
47 249 New York City was 21%. However, one could argue that our study has significantly smaller  
48  
49 250 sample size which might underestimate the actual mortality of COVID-19. Our data need  
50  
51 251 confirmation from other studies with a larger sample size.  
52  
53  
54  
55  
56  
57  
58  
59  
60



1  
2  
3 252 We identified several risk factors for mortality from COVID-19 using multivariate  
4  
5 253 logistic regression analysis. Increasing age, hypoxia and opacity/infiltrate on imaging were  
6  
7 254 associated with higher mortality. Moreover, we also found that patient survival diminished as the  
8  
9 255 disease progressed, reflected by advancement in oxygen delivery (high-flow nasal cannula,  
10  
11 256 NIPPV, and mechanical ventilation). Requiring a simple oxygen nasal cannula did not affect  
12  
13 257 mortality. Such findings are similar to previous literature. Older age is an independent risk factor  
14  
15 258 for severe COVID-19 and mortality.<sup>7,20</sup> In line with Zhou et al, increasing oxygen requirement  
16  
17 259 and need for advanced oxygen delivery were predictive of death from COVID-19.<sup>8</sup>

18  
19 260 Here, we showed that COVID-19 patients requiring ICU had 13.7-fold increased risk of  
20  
21 261 mortality. Critically ill patients generally had one or more organs in failure, and an increasing  
22  
23 262 number of organ failure has been linked to elevated death in sepsis patients.<sup>21</sup> For COVID-19  
24  
25 263 patients, we demonstrated that kidney (AKI, and RRT), pulmonary (respiratory acidosis, and  
26  
27 264 ARDS), cardiovascular (vasopressor requirement) failure were predictive of in-hospital  
28  
29 265 mortality. These findings are in line with other cohorts and each factor has been demonstrated as  
30  
31 266 an independent risk factor for mortality in critically ill patients.<sup>8,22-26</sup> Although the complications  
32  
33 267 from SARS-CoV-2 infection can be affected by multiple contributing factors, newer evidence  
34  
35 268 has suggested the significance of cytokine storm leading to multi-organ failure.<sup>27</sup>

36  
37 269 Here, we showed that elevated ferritin, LDH, procalcitonin, leukocytosis, troponin I and  
38  
39 270 possibly D-dimer were associated with increased death. Although, the odds ratio for D-dimer  
40  
41 271 cannot be calculated as one cell was zero, we observed that all deceased patients had elevated D-  
42  
43 272 dimer level and the significance of elevated D-dimer toward in-hospital mortality cannot be  
44  
45 273 ignored. Guan et al first demonstrated the importance of elevated inflammatory markers in  
46  
47 274 COVID-19 in Chinese population<sup>6</sup> which has become a standard monitoring parameter for  
48  
49  
50  
51  
52  
53  
54  
55  
56  
57  
58  
59  
60

1  
2  
3 275 COVID-19 patients.<sup>28</sup> Elevated inflammatory markers should prompt physicians to evaluate and  
4  
5 276 monitor the patients for cytokine storms and anticipated clinical deterioration. Elevated  
6  
7 277 procalcitonin and leukocytosis may indicate concomitant bacterial infection, which has been  
8  
9 278 shown to increase morbidity and mortality of viral pneumonia.<sup>29</sup> Interestingly, our study showed  
10  
11 279 that elevated troponin I level was associated with significantly higher death similar to a recent  
12  
13 280 meta-analysis.<sup>30</sup> Although the etiologies of elevated troponin levels were not determined in our  
14  
15 281 cohort, other studies proposed several mechanisms for elevated troponin level in COVID-19  
16  
17 282 patients. These include myocarditis, cytokine mediated myocardial injury, microangiopathy of  
18  
19 283 small coronary arteries, or silent coronary artery disease.<sup>26 30</sup>

24 284 The pathophysiology of cytokine storm in SARS-CoV-2 is similar to that of other viruses  
25  
26 285 or bacteria.<sup>31</sup> Cytokine storm is characterized by the overproduction of pro-inflammatory  
27  
28 286 cytokines, such as tumor necrosis factor (TNF), IL-6, and IL-1 $\beta$  resulting in an increased  
29  
30 287 vascular hyperpermeability, and activation of multiple coagulation pathways.<sup>27 32</sup> In light of  
31  
32 288 SARS-CoV-2-induced hypercoagulation, antithrombin III, tissue factor pathway inhibitor and  
33  
34 289 the protein C system were impaired during active inflammation.<sup>33</sup> These changes lead to  
35  
36 290 thrombin hyperactivity resulting in the development of microthrombosis, disseminated  
37  
38 291 intravascular coagulation (DIC) and sequential multiorgan failure.<sup>27</sup> Moreover, new studies have  
39  
40 292 revealed the spectrum of hyperferritinemic syndromes induced by SARS-CoV-2 but they are  
41  
42 293 beyond the scope of our article.<sup>34</sup> Such syndromes include macrophage activation syndrome,  
43  
44 294 adult-onset Still's disease, and catastrophic anti-phospholipid syndrome.<sup>34</sup>

49 295 Hydroxychloroquine therapy was associated with a 3-fold increased risk of QT  
50  
51 296 prolongation but not associated with increased risk of death. The concept of using  
52  
53 297 hydroxychloroquine in COVID-19 patients derived from an early *in vitro* study.<sup>35</sup> The results

1  
2  
3 298 from small non-randomized clinical trials also showed promising effects on viral load  
4  
5 299 reduction.<sup>36 37</sup> However, the clinical benefit of hydroxychloroquine was debated by a large  
6  
7  
8 300 observation study. Of 1,446 patients, Geleris et al observed that hydroxychloroquine had no  
9  
10 301 effect on the death, length of stay or intubation.<sup>38</sup> Later, the efficacy of hydroxychloroquine with  
11  
12 302 or without azithromycin has been demonstrated in a recent multicenter, randomized, open-label,  
13  
14 303 controlled trial in hospitalized patients with mild-to-moderate COVID-19.<sup>39</sup> In this study, the  
15  
16 304 authors found that the use of hydroxychloroquine, alone or with azithromycin did not improve  
17  
18 305 the clinical outcome at 15 days compared to the standard treatment. Thus, the recommendation  
19  
20 306 for use of hydroxychloroquine was recalled by the Infectious Diseases Society of America  
21  
22 307 (IDSA) due to small sample size in previous clinical trials and concern for cardiac adverse  
23  
24 308 effects, such as QT prolongation/torsade de pointe.<sup>40</sup>

25  
26  
27  
28 309 A meta-analysis of four randomized trials and one retrospective study showed that the  
29  
30 310 administration of intravenous vitamin C has vasopressor sparing effects and may reduce the need  
31  
32 311 for mechanical ventilation in critically ill patients while there was no effect on the mortality.<sup>41</sup>  
33  
34 312 However, given the lack of more supporting evidence, the standard use of ascorbic acid is not yet  
35  
36 313 recommended especially in COVID-19 patients. A new clinical trial investigating the treatment  
37  
38 314 outcome of vitamin C in severe COVID-19 is underway (NCT04264533).

39  
40  
41  
42 315 Although our study also showed that zinc supplementation was not associated with  
43  
44 316 increased mortality in COVID-19 patients, the routine use of zinc supplementation could not be  
45  
46 317 supported due to lack of randomized controlled trials. A Brazilian study revealed that plasma  
47  
48 318 zinc concentration in critically ill patients upon admission to the ICU was low and may make  
49  
50 319 these patients more susceptible to oxidative stress.<sup>42</sup> Another prospective study showed that zinc  
51  
52 320 supplementation in mechanically ventilated patients was related to less ventilator-associated  
53  
54  
55  
56  
57  
58  
59  
60

1  
2  
3 321 pneumonia.<sup>43</sup> However, the mean duration of intubation in this study was prolonged (29 days),  
4  
5 322 making it inconclusive if zinc supplementation can prevent pneumonia development in short-  
6  
7 323 term intubation.  
8  
9

10 324 Steroid therapy in COVID-19 patients was not associated with increased mortality. A  
11  
12 325 meta-analysis of 42 randomized controlled trials consisting of 10,194 patients has shown that  
13  
14 326 corticosteroids possibly result in a small reduction in mortality and an increased risk of  
15  
16 327 neuromuscular weakness among critically ill patients with sepsis.<sup>44</sup> However, the theoretical  
17  
18 328 concept for corticosteroid use in COVID-19 was to reduce cytokine storm caused by a reaction  
19  
20 329 to SARS-CoV-2 infection.<sup>45</sup> In early April 2020, the IDSA recommended against a routine use of  
21  
22 330 corticosteroids in the treatment of COVID-19 due to lack of evidence.<sup>40</sup> This guidelines was  
23  
24 331 updated on June 25<sup>th</sup>, 2020 after the results of the RECOVERY trial was released showing that  
25  
26 332 patients who received dexamethasone were more likely to be discharged from hospital at 28 days  
27  
28 333 compared to non-steroids group.<sup>46</sup> Thus, currently, the IDSA panel suggests glucocorticoids use  
29  
30 334 in hospitalized patients with severe COVID-19.<sup>40</sup> Here, our study is in line with the  
31  
32 335 recommendation from the IDSA.  
33  
34  
35  
36  
37

38 336 We have observed that remdesivir and tocilizumab were not associated with mortality  
39  
40 337 and there was no significant improvement in hospital length of stay between patients receiving  
41  
42 338 these drugs. However, given the observational, non-randomized design of this study, it is  
43  
44 339 difficult to determine the efficacy of such treatment. Recently, the preliminary report from a  
45  
46 340 phase 3 randomized controlled trial revealed that remdesivir was superior to placebo in  
47  
48 341 shortening the time to recovery in adults hospitalized with COVID-19.<sup>47</sup> Several retrospective  
49  
50 342 studies reported that tocilizumab, an IL-6 inhibitor, was shown to reduce the levels of serum  
51  
52 343 inflammatory markers. However, the impact on clinical improvement and mortality remained  
53  
54  
55  
56  
57  
58  
59  
60

1  
2  
3 344 inconclusive.<sup>48-50</sup> Although we reported no significant clinical benefits from tocilizumab, the  
4  
5 345 consideration for compassionate use of tocilizumab is not discouraged but rather dependent on  
6  
7 346 the judgment of clinicians based on current evidence. A phase 2 (TOCIVID-19; NCT04317092)  
8  
9  
10 347 and 3 randomized controlled trial (COVACTA; NCT04320615) of tocilizumab is being  
11  
12 348 investigated for the treatment of COVID-19 pneumonia. The preliminary results are expected to  
13  
14  
15 349 release in late 2020.

16  
17 350 Similarly, we found that convalescent plasma was not associated with in-hospital  
18  
19 351 mortality. The safety of convalescent plasma was demonstrated in a single-center retrospective  
20  
21 352 cohort of 25 patients<sup>51</sup> and in a preprint, non-peer review report.<sup>52</sup> However, the efficacy of  
22  
23 353 convalescent plasma remained undetermined due to lack of control group. The IDSA panel has  
24  
25  
26 354 recommended convalescent plasma only in the context of a clinical trials. However, at our  
27  
28 355 institution, convalescent plasma is considered if patients have severe symptoms and have  
29  
30 356 contraindications to remdesivir, such as AKI and hepatic dysfunction. Although we did not  
31  
32  
33 357 observe mortality adverse effect from convalescent plasma, the final recommendations on its  
34  
35 358 efficacy and safety are dependent on the randomized controlled trials. To date, at least one  
36  
37  
38 359 randomized controlled trial (NCT04342182) is being investigated to establish the clinical  
39  
40 360 benefits in hospitalized patients with severe COVID-19.

41  
42 361 From our ICU cohort, the SOFA score, AKI and ARDS were the only variables that were  
43  
44 362 predictive of mortality among patients admitted to the ICU. Interestingly, all treatment measures  
45  
46 363 had no effect on mortality once patients were critically ill and required ICU. This could imply  
47  
48  
49 364 that these treatment interventions might be beneficial if given prior to clinical decompensation or  
50  
51 365 ICU transfer. However, interpretation is restricted due to small sample size and examining only

1  
2  
3 366 critically ill patients. Our hypothesis should be substantiated by studies from other institutions  
4  
5 367 with larger sample sizes.  
6

7  
8 368 Our study has some limitations. The observational design made the results susceptible to  
9  
10 369 selection bias. Analyses could be underpowered given the small sample size. However, we  
11  
12 370 improved the validity of the results by performing bootstrapping analysis. Moreover, due to  
13  
14 371 restricted availability, not many cases had received compassionate use of tocilizumab, remdesivir,  
15  
16 372 and convalescent plasma, which may limit the applicability of our findings. More importantly, the  
17  
18 373 mortality can be affected by confounding factors. We minimize this risk by applying multivariate  
19  
20 374 analysis. Most of the collected data were cross sectional, thus, making it difficult to conclude the  
21  
22 375 causality between the two variables. Furthermore, our binary logistic regression analyses may not  
23  
24 376 strictly follow the one-in-ten rule which may lead to over-fitting effect. However, our statistical  
25  
26 377 rationale is supported by newer simulation studies by McCulloch et al.,<sup>53</sup> and Smeden et al.<sup>54</sup>  
27  
28 378 Moreover, we advised the readers to consider their patient population to determine the applicability  
29  
30 379 of our results.  
31  
32  
33  
34

35 380 In conclusion, COVID-19 is a serious condition with a significant in-hospital mortality  
36  
37 381 rate. Multiple risk factors for in-hospital death were identified. Increasing SOFA score, AKI and  
38  
39 382 ARDS are significant risk factors for increased death in critically ill patients.  
40  
41  
42  
43

44 383

#### 45 384 **Acknowledgement**

46  
47 385 We would like to thank UPMC Pinnacle IT support for medical record procurement and Mrs.  
48  
49 386 Yijin Wert for constructing the Kaplan-Meier curves.  
50

51 387

52 388

1  
2  
3 389  
4  
5 390  
6  
7  
8 391  
9  
10 392  
11  
12 393  
13  
14 394  
15  
16 395  
17  
18  
19 396  
20  
21 397  
22  
23 398  
24  
25 399  
26  
27 400  
28  
29 401  
30  
31 402  
32  
33 403  
34  
35 404  
36  
37 405  
38  
39 406  
40  
41 407  
42  
43 408  
44  
45 409  
46  
47 410  
48  
49 411  
50  
51  
52  
53  
54  
55  
56  
57  
58  
59  
60

**Figure 1.** Flowchart of subject selection from UPMC Pinnacle COVID-19 registry from March 1 to May 31, 2020.

**Figure 2.** Survival analysis by Kaplan-Meier curves. **A)** The cumulative survival declined with increasing length of hospital stay. The median survival time was 25 days with standard error (SE) of 7.0. **B)** ICU patients significantly lower survival probability with mean survival time of 22.3 days (SE 1.8) and 23.0 (SE 1.3) in ICU group vs. non-ICU group, respectively ( $p = 0.002$ ). **C)** The cumulative survival between ICU patients with and without acute respiratory distress syndrome ( $p = 0.302$ ). **D)** The cumulative survival between ICU patients with and without acute kidney injury ( $p = 0.504$ ).

1  
2  
3 412  
4  
5 413  
6  
7  
8 414  
9  
10 415  
11  
12 416  
13  
14 417  
15  
16  
17 418  
18  
19 419  
20  
21  
22 420  
23  
24 421  
25  
26 422  
27  
28 423  
29  
30  
31 424  
32  
33 425  
34  
35 426  
36  
37 427  
38  
39 428  
40  
41  
42 429  
43  
44 430  
45  
46  
47 431  
48  
49 432  
50  
51 433  
52  
53  
54 434  
55  
56  
57  
58  
59  
60

## DECLARATIONS

**Funding:** None

**Disclosure of Potential Conflicts of Interest:** The authors declared no potential conflicts of interest.

**Ethics Approval:** UPMC Pinnacle Ethic Committee approved this study (#20E024).

**Informed Consent:** Not applicable.

**Data availability:** Raw data are available upon reasonable request.

**Authors' contributions:** K.P.G., P.H., M.G. collected the data. P.H. analyzed the data. K.P.G., P.H., and J.D.G. drafted the manuscript. All authors edited and approved the manuscript for submission.



1  
2  
3 435  
4  
5  
6 436  
7  
8 437  
9  
10 438  
11  
12 439  
13  
14  
15 440  
16 441  
17 442  
18 443  
19 444  
20 445  
21 446  
22 447  
23 448  
24 449  
25 450  
26 451  
27 452  
28 453  
29 454  
30 455  
31 456  
32 457  
33 458  
34 459  
35 460  
36 461  
37 462  
38 463  
39 464  
40 465  
41 466  
42 467  
43 468  
44 469  
45 470  
46 471  
47 472  
48 473  
49 474  
50  
51  
52  
53  
54  
55  
56  
57  
58  
59  
60

## REFERENCES

1. WHO. Coronavirus disease (COVID-19) pandemic. <https://www.who.int/emergencies/diseases/novel-coronavirus-2019>. Accessed on August 29th 2020
2. Department of Health. COVID-19 Data for Pennsylvania. <https://www.health.pa.gov/topics/disease/coronavirus/Pages/Cases.aspx>. Accessed on August 29th
3. Arentz M, Yim E, Klaff L, et al. Characteristics and Outcomes of 21 Critically Ill Patients With COVID-19 in Washington State. *JAMA* 2020;323(16):1612-14. doi: 10.1001/jama.2020.4326
4. Myers LC, Parodi SM, Escobar GJ, et al. Characteristics of Hospitalized Adults With COVID-19 in an Integrated Health Care System in California. *Jama* 2020 doi: 10.1001/jama.2020.7202 [published Online First: 2020/04/25]
5. Richardson S, Hirsch JS, Narasimhan M, et al. Presenting Characteristics, Comorbidities, and Outcomes Among 5700 Patients Hospitalized With COVID-19 in the New York City Area. *Jama* 2020;323(20):2052-9. doi: 10.1001/jama.2020.6775 [published Online First: 2020/04/23]
6. Guan W-j, Ni Z-y, Hu Y, et al. Clinical Characteristics of Coronavirus Disease 2019 in China. *New England Journal of Medicine* 2020;382(18):1708-20. doi: 10.1056/NEJMoa2002032
7. Du RH, Liang LR, Yang CQ, et al. Predictors of mortality for patients with COVID-19 pneumonia caused by SARS-CoV-2: a prospective cohort study. *Eur Respir J* 2020;55(5) doi: 10.1183/13993003.00524-2020 [published Online First: 2020/04/10]
8. Zhou F, Yu T, Du R, et al. Clinical course and risk factors for mortality of adult inpatients with COVID-19 in Wuhan, China: a retrospective cohort study. *Lancet* 2020;395(10229):1054-62. doi: 10.1016/s0140-6736(20)30566-3 [published Online First: 2020/03/15]
9. Gautret P, Lagier JC, Parola P, et al. Hydroxychloroquine and azithromycin as a treatment of COVID-19: results of an open-label non-randomized clinical trial. *Int J Antimicrob Agents* 2020:105949.
10. Fowler AA, 3rd, Truwit JD, Hite RD, et al. Effect of Vitamin C Infusion on Organ Failure and Biomarkers of Inflammation and Vascular Injury in Patients With Sepsis and Severe Acute Respiratory Failure: The CITRIS-ALI Randomized Clinical Trial. *Jama* 2019;322(13):1261-70. doi: 10.1001/jama.2019.11825 [published Online First: 2019/10/02]

- 1  
2  
3 475 11. Caly L, Druce JD, Catton MG, et al. The FDA-approved drug ivermectin inhibits the  
4 476 replication of SARS-CoV-2 in vitro. *Antiviral Res* 2020;178:104787. doi:  
5 477 10.1016/j.antiviral.2020.104787 [published Online First: 2020/04/07]
- 6 478 12. te Velthuis AJ, van den Worm SH, Sims AC, et al. Zn(2+) inhibits coronavirus and  
7 479 arterivirus RNA polymerase activity in vitro and zinc ionophores block the replication of  
8 480 these viruses in cell culture. *PLoS Pathog* 2010;6(11):e1001176. doi:  
9 481 10.1371/journal.ppat.1001176 [published Online First: 2010/11/17]
- 10 482 13. Ferreira FL, Bota DP, Bross A, et al. Serial evaluation of the SOFA score to predict outcome  
11 483 in critically ill patients. *Jama* 2001;286(14):1754-8. doi: 10.1001/jama.286.14.1754  
12 484 [published Online First: 2001/10/12]
- 13 485 14. Levey AS, Stevens LA, Schmid CH, et al. A new equation to estimate glomerular filtration  
14 486 rate. *Ann Intern Med* 2009;150(9):604-12. doi: 10.7326/0003-4819-150-9-200905050-  
15 487 00006 [published Online First: 2009/05/06]
- 16 488 15. Khwaja A. KDIGO clinical practice guidelines for acute kidney injury. *Nephron Clin Pract*  
17 489 2012;120(4):c179-84. doi: 10.1159/000339789 [published Online First: 2012/08/15]
- 18 490 16. KDIGO clinical practice guideline for the diagnosis, evaluation, prevention, and treatment of  
19 491 Chronic Kidney Disease-Mineral and Bone Disorder (CKD-MBD). *Kidney Int Suppl*  
20 492 2009(113):S1-130. doi: 10.1038/ki.2009.188 [published Online First: 2009/08/01]
- 21 493 17. Ferguson ND, Fan E, Camporota L, et al. The Berlin definition of ARDS: an expanded  
22 494 rationale, justification, and supplementary material. *Intensive Care Med*  
23 495 2012;38(10):1573-82. doi: 10.1007/s00134-012-2682-1 [published Online First:  
24 496 2012/08/29]
- 25 497 18. Hazra A. Using the confidence interval confidently. *J Thorac Dis* 2017;9(10):4125-30. doi:  
26 498 10.21037/jtd.2017.09.14
- 27 499 19. Cheng Y, Luo R, Wang K, et al. Kidney disease is associated with in-hospital death of  
28 500 patients with COVID-19. *Kidney Int* 2020;97(5):829-38. doi: 10.1016/j.kint.2020.03.005  
29 501 [published Online First: 2020/04/06]
- 30 502 20. Li X, Xu S, Yu M, et al. Risk factors for severity and mortality in adult COVID-19 inpatients  
31 503 in Wuhan. *J Allergy Clin Immunol* 2020 doi: 10.1016/j.jaci.2020.04.006 [published  
32 504 Online First: 2020/04/16]
- 33 505 21. Gustot T. Multiple organ failure in sepsis: prognosis and role of systemic inflammatory  
34 506 response. *Curr Opin Crit Care* 2011;17(2):153-9. doi: 10.1097/MCC.0b013e328344b446  
35 507 [published Online First: 2011/02/25]
- 36 508 22. Elseviers MM, Lins RL, Van der Niepen P, et al. Renal replacement therapy is an  
37 509 independent risk factor for mortality in critically ill patients with acute kidney injury. *Crit*  
38 510 *Care* 2010;14(6):R221. doi: 10.1186/cc9355 [published Online First: 2010/12/03]
- 39 511 23. Martin C, Viviani X, Leone M, et al. Effect of norepinephrine on the outcome of septic  
40 512 shock. *Crit Care Med* 2000;28(8):2758-65. doi: 10.1097/00003246-200008000-00012  
41 513 [published Online First: 2000/08/31]
- 42 514 24. Wang CY, Calfee CS, Paul DW, et al. One-year mortality and predictors of death among  
43 515 hospital survivors of acute respiratory distress syndrome. *Intensive Care Med*  
44 516 2014;40(3):388-96. doi: 10.1007/s00134-013-3186-3 [published Online First:  
45 517 2014/01/18]
- 46 518 25. Combes A, Costa MA, Trouillet JL, et al. Morbidity, mortality, and quality-of-life outcomes  
47 519 of patients requiring  $\geq 14$  days of mechanical ventilation. *Crit Care Med*

- 2003;31(5):1373-81. doi: 10.1097/01.Ccm.0000065188.87029.C3 [published Online First: 2003/05/29]
26. Li J-W, Han T-W, Woodward M, et al. The impact of 2019 novel coronavirus on heart injury: A Systematic review and Meta-analysis. *Progress in Cardiovascular Diseases* 2020 doi: <https://doi.org/10.1016/j.pcad.2020.04.008>
27. Jose RJ, Manuel A. COVID-19 cytokine storm: the interplay between inflammation and coagulation. *Lancet Respir Med* 2020;8(6):e46-e47. doi: 10.1016/s2213-2600(20)30216-2 [published Online First: 2020/05/01]
28. Annane D, Pastores SM, Rochweg B, et al. Guidelines for the Diagnosis and Management of Critical Illness-Related Corticosteroid Insufficiency (CIRCI) in Critically Ill Patients (Part I): Society of Critical Care Medicine (SCCM) and European Society of Intensive Care Medicine (ESICM) 2017. *Crit Care Med* 2017;45(12):2078-88. doi: 10.1097/ccm.0000000000002737 [published Online First: 2017/09/25]
29. Morris DE, Cleary DW, Clarke SC. Secondary Bacterial Infections Associated with Influenza Pandemics. *Front Microbiol* 2017;8:1041. doi: 10.3389/fmicb.2017.01041 [published Online First: 2017/07/12]
30. Vrsalovic M, Vrsalovic Presecki A. Cardiac troponins predict mortality in patients with COVID-19: A meta-analysis of adjusted risk estimates. *J Infect* 2020 doi: 10.1016/j.jinf.2020.05.022 [published Online First: 2020/05/18]
31. Tisoncik JR, Korth MJ, Simmons CP, et al. Into the eye of the cytokine storm. *Microbiol Mol Biol Rev* 2012;76(1):16-32. doi: 10.1128/mubr.05015-11 [published Online First: 2012/03/07]
32. Meduri GU, Kohler G, Headley S, et al. Inflammatory cytokines in the BAL of patients with ARDS. Persistent elevation over time predicts poor outcome. *Chest* 1995;108(5):1303-14. doi: 10.1378/chest.108.5.1303 [published Online First: 1995/11/01]
33. José RJ, Williams AE, Chambers RC. Proteinase-activated receptors in fibroproliferative lung disease. *Thorax* 2014;69(2):190-2. doi: 10.1136/thoraxjnl-2013-204367 [published Online First: 2013/11/05]
34. Colafrancesco S, Alessandri C, Conti F, et al. COVID-19 gone bad: A new character in the spectrum of the hyperferritinemic syndrome? *Autoimmun Rev* 2020;19(7):102573. doi: 10.1016/j.autrev.2020.102573 [published Online First: 2020/05/11]
35. Biot C, Daher W, Chavain N, et al. Design and synthesis of hydroxyferroquine derivatives with antimalarial and antiviral activities. *J Med Chem* 2006;49(9):2845-9. doi: 10.1021/jm0601856 [published Online First: 2006/04/28]
36. Gao J, Tian Z, Yang X. Breakthrough: Chloroquine phosphate has shown apparent efficacy in treatment of COVID-19 associated pneumonia in clinical studies. *Bioscience trends* 2020
37. Gautret P, Lagier JC, Parola P, et al. Hydroxychloroquine and azithromycin as a treatment of COVID-19: results of an open-label non-randomized clinical trial. *Int J Antimicrob Agents* 2020:105949. doi: 10.1016/j.ijantimicag.2020.105949 [published Online First: 2020/03/25]
38. Geleris J, Sun Y, Platt J, et al. Observational Study of Hydroxychloroquine in Hospitalized Patients with Covid-19. *N Engl J Med* 2020;382(25):2411-18. doi: 10.1056/NEJMoa2012410 [published Online First: 2020/05/08]

- 1  
2  
3 564 39. Cavalcanti AB, Zampieri FG, Rosa RG, et al. Hydroxychloroquine with or without  
4 565 Azithromycin in Mild-to-Moderate Covid-19. *New England Journal of Medicine* 2020  
5 566 doi: 10.1056/NEJMoa2019014  
6  
7 567 40. Bhimraj A, Morgan RL, Shumaker AH, et al. Infectious Diseases Society of America  
8 568 Guidelines on the Treatment and Management of Patients with COVID-19. *Clin Infect*  
9 569 *Dis* 2020 doi: 10.1093/cid/ciaa478 [published Online First: 2020/04/28]  
10 570 41. Zhang M, Jativa DF. Vitamin C supplementation in the critically ill: A systematic review and  
11 571 meta-analysis. *SAGE Open Med* 2018;6:2050312118807615. doi:  
12 572 10.1177/2050312118807615 [published Online First: 2018/10/27]  
13 573 42. Cirino Ruocco MA, Pacheco Cechinatti ED, Barbosa F, Jr., et al. Zinc and selenium status in  
14 574 critically ill patients according to severity stratification. *Nutrition* 2018;45:85-89. doi:  
15 575 10.1016/j.nut.2017.07.009 [published Online First: 2017/11/14]  
16 576 43. Hasanzadeh Kiabi F, Alipour A, Darvishi-Khezri H, et al. Zinc Supplementation in Adult  
17 577 Mechanically Ventilated Trauma Patients is Associated with Decreased Occurrence of  
18 578 Ventilator-associated Pneumonia: A Secondary Analysis of a Prospective, Observational  
19 579 Study. *Indian J Crit Care Med* 2017;21(1):34-39. doi: 10.4103/0972-5229.198324  
20 580 [published Online First: 2017/02/16]  
21 581 44. Annetta M, Maviglia R, Proietti R, et al. Use of corticosteroids in critically ill septic patients  
22 582 : a review of mechanisms of adrenal insufficiency in sepsis and treatment. *Curr Drug*  
23 583 *Targets* 2009;10(9):887-94. doi: 10.2174/138945009789108792 [published Online First:  
24 584 2009/10/06]  
25 585 45. Scaroni C, Armigliato M, Cannavò S. COVID-19 outbreak and steroids administration: are  
26 586 patients treated for Sars-Cov-2 at risk of adrenal insufficiency? *J Endocrinol Invest*  
27 587 2020:1-2. doi: 10.1007/s40618-020-01253-1 [published Online First: 2020/04/18]  
28 588 46. Dexamethasone in Hospitalized Patients with Covid-19 — Preliminary Report. *New England*  
29 589 *Journal of Medicine* 2020 doi: 10.1056/NEJMoa2021436  
30 590 47. Beigel JH, Tomashek KM, Dodd LE, et al. Remdesivir for the Treatment of Covid-19 —  
31 591 Preliminary Report. *New England Journal of Medicine* 2020 doi:  
32 592 10.1056/NEJMoa2007764  
33 593 48. Luo P, Liu Y, Qiu L, et al. Tocilizumab treatment in COVID-19: A single center experience.  
34 594 *J Med Virol* 2020;92(7):814-18. doi: 10.1002/jmv.25801 [published Online First:  
35 595 2020/04/08]  
36 596 49. Alattar R, Ibrahim TBH, Shaar SH, et al. Tocilizumab for the treatment of severe coronavirus  
37 597 disease 2019. *J Med Virol* 2020 doi: 10.1002/jmv.25964 [published Online First:  
38 598 2020/05/06]  
39 599 50. Campochiaro C, Della-Torre E, Cavalli G, et al. Efficacy and safety of tocilizumab in severe  
40 600 COVID-19 patients: a single-centre retrospective cohort study. *Eur J Intern Med*  
41 601 2020;76:43-49. doi: 10.1016/j.ejim.2020.05.021 [published Online First: 2020/06/03]  
42 602 51. Salazar E, Perez KK, Ashraf M, et al. Treatment of Coronavirus Disease 2019 (COVID-19)  
43 603 Patients with Convalescent Plasma. *Am J Pathol* 2020 doi: 10.1016/j.ajpath.2020.05.014  
44 604 [published Online First: 2020/05/31]  
45 605 52. Joyner M, Wright RS, Fairweather D, et al. Early Safety Indicators of COVID-19  
46 606 Convalescent Plasma in 5,000 Patients. *medRxiv* 2020:2020.05.12.20099879. doi:  
47 607 10.1101/2020.05.12.20099879  
48  
49  
50  
51  
52  
53  
54  
55  
56  
57  
58  
59

- 608 53. Vittinghoff E, McCulloch CE. Relaxing the Rule of Ten Events per Variable in Logistic and  
 609 Cox Regression. *American Journal of Epidemiology* 2007;165(6):710-18. doi:  
 610 10.1093/aje/kwk052
- 611 54. van Smeden M, de Groot JAH, Moons KGM, et al. No rationale for 1 variable per 10 events  
 612 criterion for binary logistic regression analysis. *BMC Medical Research Methodology*  
 613 2016;16(1):163. doi: 10.1186/s12874-016-0267-3

614  
615  
616  
617  
618  
619 **Table 1.** Demographics and baseline characteristics of included patients.

| Characteristics                       | All patients<br>(n = 283) | Survivors<br>(n = 228)   | Non-survivors<br>(n = 55) | P-value  |
|---------------------------------------|---------------------------|--------------------------|---------------------------|----------|
| Male                                  | 159 (56.2)                | 125 (54.8)               | 34 (61.8)                 | 0.348    |
| Age (year)                            | 64.1 (15.9) <sup>†</sup>  | 61.9 (15.8) <sup>†</sup> | 72.8 (13.5) <sup>†</sup>  | < 0.001* |
| <b>Ethnicity</b>                      |                           |                          |                           |          |
| Caucasian                             | 143 (50.5)                | 111 (48.7)               | 32 (58.2)                 | 0.705    |
| African-American                      | 88 (31.1)                 | 73 (32.0)                | 15 (27.3)                 |          |
| Hispanic/Latino                       | 32 (11.3)                 | 27 (11.8)                | 5 (9.1)                   |          |
| Asian                                 | 17 (6.0)                  | 14 (6.1)                 | 3 (5.5)                   |          |
| Others                                | 3 (1.1)                   | 3 (1.3)                  | 0 (0)                     |          |
| <b>Co-morbidities</b>                 |                           |                          |                           |          |
| Obesity (BMI ≥ 30 kg/m <sup>2</sup> ) | 132 (46.6)                | 102 (44.7)               | 30 (54.5)                 | 0.191    |
| Current/Former smokers                | 109 (38.5)                | 88 (38.6)                | 21 (38.2)                 | 0.955    |
| Hypertension                          | 189 (66.8)                | 145 (63.6)               | 44 (80.0)                 | 0.020*   |
| Diabetes mellitus                     | 108 (38.2)                | 81 (35.5)                | 27 (49.1)                 | 0.063    |
| Hyperlipidemia                        | 121 (42.8)                | 94 (41.2)                | 27 (49.1)                 | 0.290    |
| Coronary artery disease               | 50 (17.7)                 | 40 (17.5)                | 10 (18.2)                 | 0.911    |
| Heart failure/cardiomyopathy          | 53 (18.7)                 | 40 (17.5)                | 13 (23.6)                 | 0.299    |
| Arrhythmia/conduction disorders       | 45 (15.9)                 | 36 (15.8)                | 9 (16.4)                  | 0.917    |
| Chronic kidney disease                | 66 (23.3)                 | 46 (20.2)                | 20 (36.4)                 | 0.011*   |
| End-stage kidney disease              | 13 (4.6)                  | 12 (5.3)                 | 1 (1.8)                   | 0.474    |
| Asthma/COPD                           | 73 (25.8)                 | 54 (23.7)                | 19 (34.5)                 | 0.098    |
| Cerebrovascular disease               | 40 (14.1)                 | 32 (14.0)                | 8 (14.5)                  | 0.922    |
| <b>Signs and symptoms</b>             |                           |                          |                           |          |
| Cough                                 | 185 (65.4)                | 149 (65.4)               | 36 (65.5)                 | 0.988    |
| Dyspnea                               | 203 (71.7)                | 158 (69.3)               | 45 (81.8)                 | 0.064    |
| Hypoxia (SpO <sub>2</sub> < 95%)      | 178 (62.9)                | 130 (57.0)               | 48 (87.3)                 | < 0.001* |
| Rhinorrhea                            | 29 (10.2)                 | 26 (11.4)                | 3 (5.5)                   | 0.226    |
| Fever/chills                          | 179 (63.3)                | 143 (62.7)               | 36 (65.5)                 | 0.706    |
| Chest pain                            | 35 (12.4)                 | 32 (14.0)                | 3 (5.5)                   | 0.109    |
| Headache                              | 28 (9.9)                  | 26 (11.4)                | 2 (3.6)                   | 0.128    |
| Gastrointestinal symptoms             | 79 (27.9)                 | 68 (29.8)                | 11 (20.0)                 | 0.145    |
| Asymptomatic                          | 8 (2.8)                   | 8 (3.5)                  | 0 (0)                     | 0.361    |
| Rales/crackles                        | 57 (20.1)                 | 40 (17.5)                | 17 (30.9)                 | 0.027*   |



|                                       |              |              |              |          |
|---------------------------------------|--------------|--------------|--------------|----------|
| Rhonchi                               | 57 (20.1)    | 45 (19.7)    | 12 (21.8)    | 0.730    |
| Reduced breath sound                  | 63 (22.3)    | 48 (21.1)    | 15 (27.3)    | 0.320    |
| <b>Laboratory findings</b>            |              |              |              |          |
| Leukopenia (WBC < 4,000 /uL)          | 56 (19.8)    | 46 (20.2)    | 10 (18.2)    | 0.739    |
| Leukocytosis (WBC > 10,000 /uL)       | 80 (28.3)    | 53 (23.2)    | 27 (49.1)    | < 0.001* |
| Lymphocytopenia (ALC < 1,000 /uL)     | 109 (38.7)   | 78 (34.2)    | 31 (57.4)    | 0.002*   |
| Thrombocytopenia (< 140,000 /uL)      | 57 (20.1)    | 41 (18.0)    | 16 (29.1)    | 0.065    |
| Thrombocytosis (> 400,000 /uL)        | 31 (11.0)    | 25 (11.0)    | 6 (10.9)     | 0.991    |
| Respiratory acidosis                  | 43 (21.3)    | 18 (11.8)    | 25 (50.0)    | < 0.001* |
| Transaminitis (ALT > 3X UNL)          | 33 (12.4)    | 21 (9.9)     | 12 (21.8)    | 0.017*   |
| Serum creatinine (mg/dL) on admission | 1.06 (0.72)‡ | 1.59 (1.88)† | 1.64 (1.15)† | 0.808    |
| eGFR (mL/min/1.73m <sup>2</sup> )     | 64.2 (51.0)† | 66.7 (35.5)† | 53.6 (25.3)† | 0.002*   |
| Troponin I (> 0.03 ng/mL)             | 91 (39.1)    | 61 (33.0)    | 30 (62.5)    | < 0.001* |
| <b>Inflammatory markers</b>           |              |              |              |          |
| D-dimer (> 500 ng/mL)                 | 135 (80.4)   | 101 (75.4)   | 34 (100)     | < 0.001* |
| Ferritin (> 336 ng/mL)                | 109 (65.3)   | 78 (59.1)    | 31 (88.6)    | 0.001*   |
| Lactate dehydrogenase (> 200 U/L)     | 108 (73.0)   | 77 (67.0)    | 31 (93.9)    | 0.002*   |
| C-reactive protein (> 1 mg/dL)        | 152 (87.4)   | 115 (83.9)   | 37 (100)     | 0.005*   |
| Procalcitonin (> 0.25 ng/mL)          | 73 (47.1)    | 50 (41.7)    | 23 (65.7)    | 0.012*   |
| ST-T change on EKG                    | 84 (31.8)    | 63 (29.7)    | 21 (40.4)    | 0.139    |
| <b>Radiographic findings</b>          |              |              |              |          |
| Opacity/infiltrate                    | 209 (73.9)   | 162 (71.1)   | 47 (85.5)    | 0.029*   |
| Ground glass appearance               | 79 (27.9)    | 65 (28.5)    | 14 (25.5)    | 0.650    |
| Pleural effusion                      | 24 (8.5)     | 17 (7.5)     | 7 (12.7)     | 0.208    |
| Pulmonary congestion                  | 30 (10.6)    | 23 (10.1)    | 7 (12.7)     | 0.568    |
| <b>Oxygen therapy/delivery</b>        |              |              |              |          |
| Nasal cannula                         | 207 (73.1)   | 160 (70.2)   | 47 (85.5)    | 0.022*   |
| High-flow nasal cannula               | 36 (12.7)    | 18 (7.9)     | 18 (32.7)    | < 0.001* |
| NIPPV                                 | 28 (9.9)     | 10 (4.4)     | 18 (32.7)    | < 0.001* |
| Mechanical ventilation                | 58 (20.5)    | 25 (11.0)    | 33 (60.0)    | < 0.001* |
| <b>Intervention</b>                   |              |              |              |          |
| Intensive care unit                   | 89 (31.4)    | 47 (20.6)    | 42 (76.4)    | < 0.001* |
| ECMO                                  | 2 (0.7)      | 0 (0)        | 2 (3.6)      | 0.037*   |
| RRT                                   | 16 (5.7)     | 3 (1.3)      | 13 (23.6)    | < 0.001* |
| Vasopressor                           | 53 (18.7)    | 19 (8.3)     | 34 (61.8)    | < 0.001* |
| Antibiotics                           | 220 (77.7)   | 166 (72.8)   | 54 (98.2)    | < 0.001* |
| <b>Treatment</b>                      |              |              |              |          |
| Azithromycin                          | 182 (64.3)   | 139 (61.0)   | 43 (78.2)    | 0.017*   |
| Hydroxychloroquine                    | 67 (23.7)    | 45 (19.7)    | 22 (40.0)    | 0.002*   |
| Steroids                              | 46 (16.3)    | 26 (11.4)    | 20 (36.4)    | < 0.001* |
| Ascorbic acid                         | 57 (20.1)    | 38 (16.7)    | 19 (34.5)    | 0.003*   |
| Zinc                                  | 54 (19.1)    | 33 (14.5)    | 21 (38.2)    | < 0.001* |
| Tocilizumab                           | 12 (4.2)     | 6 (2.6)      | 6 (10.9)     | 0.006*   |
| Convalescent plasma                   | 36 (12.7)    | 19 (8.3)     | 17 (30.9)    | < 0.001* |
| Remdesivir                            | 25 (8.8)     | 20 (8.8)     | 5 (8.8)      | 0.940    |
| <b>Complications</b>                  |              |              |              |          |
| Acute kidney injury                   | 115 (40.6)   | 75 (32.9)    | 40 (72.7)    | < 0.001* |
| ARDS                                  | 53 (18.7)    | 17 (7.5)     | 36 (65.5)    | < 0.001* |
| Arrhythmias                           | 31 (11.0)    | 18 (7.9)     | 13 (23.6)    | 0.001*   |
| QT prolongation                       | 25 (8.8)     | 18 (7.9)     | 7 (12.7)     | 0.257    |
| Venous thromboembolism                | 10 (3.5)     | 8 (3.5)      | 2 (3.6)      | 1.000    |
| Arterial thrombosis                   | 1 (0.4)      | 1 (0.4)      | 0 (0)        | 1.000    |

|                         |            |             |            |        |
|-------------------------|------------|-------------|------------|--------|
| Cerebrovascular event   | 3 (1.1)    | 3 (1.3)     | 0 (0)      | 1.000  |
| Myocardial infection    | 5 (1.8)    | 4 (1.8)     | 1 (1.8)    | 1.000  |
| Heart failure           | 16 (5.7)   | 11 (4.8)    | 5 (9.1)    | 0.219  |
| Superimposed bacteremia | 19 (6.7)   | 12 (5.3)    | 7 (12.7)   | 0.047* |
| Hospital stay (day)     | 6.0 (7.0)‡ | 7.4 (7.53)† | 9.2 (7.7)† | 0.125  |
| <b>Outcome</b>          |            |             |            |        |
| Recovery/discharge      | 223 (78.8) |             |            |        |
| Remained hospitalized   | 2 (0.7)    |             |            |        |
| Death                   | 55 (19.4)  |             |            |        |

ALC, absolute lymphocyte count; ALT, alanine transaminase; ARDS, acute respiratory distress syndrome; BMI, body mass index; COPD, chronic obstructive pulmonary disease; ECMO, extra-corporeal membrane oxygenation; eGFR, estimated glomerular filtration rate; EKG, electrocardiography; IQR, interquartile range; NIPPV, non-invasive positive pressure ventilation; RRT, renal replacement therapy; SD, standard deviation; SpO<sub>2</sub>, oxygen saturation; UNL, upper normal limit; WBC, white blood cell.

\*statistically significant

†mean (standard deviation)

‡median (IQR)

**Table 2.** Clinical risk factors for overall in-hospital mortality using univariate binary logistic regression analysis.

| Characteristics                                     | Odds ratio | 95% CI        | P-value  |
|-----------------------------------------------------|------------|---------------|----------|
| Age (per 1-year increment)                          | 1.051      | 1.028-1.075   | < 0.001* |
| Hypertension                                        | 2.288      | 1.121-4.673   | 0.024*   |
| Chronic kidney disease                              | 2.262      | 1.195-4.274   | 0.012*   |
| Hypoxia (SpO <sub>2</sub> < 95%)                    | 5.181      | 2.242-11.905  | < 0.001* |
| Rales/crackles                                      | 2.101      | 1.080-4.098   | 0.029*   |
| Leukocytosis (WBC > 10,000 /uL)                     | 3.185      | 1.727-5.882   | < 0.001* |
| Respiratory acidosis                                | 7.463      | 3.546-15.625  | < 0.001* |
| Transaminitis (ALT > 3X UNL)                        | 2.538      | 1.160-5.556   | 0.020*   |
| eGFR (per 1.0 mL/min/1.73m <sup>2</sup> increment)† | 0.988      | 0.980-0.997   | 0.011*   |
| D-dimer (> 500 ng/mL)‡                              | -          | -             | -        |
| Ferritin (> 336 ng/mL)                              | 5.376      | 1.789-16.129  | 0.003*   |
| Lactate dehydrogenase (> 200 U/L)                   | 7.634      | 1.739-33.333  | 0.007*   |
| C-reactive protein (> 1 mg/dL)‡                     | -          | -             | -        |
| Procalcitonin (> 0.25 ng/mL)                        | 2.681      | 1.222-5.882   | 0.014*   |
| Troponin I (> 0.03 ng/mL)                           | 3.390      | 1.751-6.536   | < 0.001* |
| Opacity/infiltrate on imaging                       | 2.392      | 1.073-5.348   | 0.033*   |
| Nasal cannula                                       | 2.494      | 1.120-5.556   | 0.025*   |
| High-flow nasal cannula                             | 5.682      | 2.703-11.905  | < 0.001* |
| NIPPV                                               | 10.638     | 4.545-2.500   | < 0.001* |
| Mechanical ventilation                              | 12.195     | 6.173-23.810  | < 0.001* |
| ICU admission/transfer                              | 12.500     | 6.173-25.000  | < 0.001* |
| ECMO‡                                               | -          | -             | -        |
| RRT                                                 | 23.256     | 6.329-83.333  | < 0.001* |
| Vasopressor                                         | 17.857     | 8.696-37.037  | < 0.001* |
| Antibiotics                                         | 20.000     | 2.732-142.857 | 0.003*   |
| Azithromycin                                        | 2.294      | 1.147-4.587   | 0.019*   |

|                         |        |               |          |
|-------------------------|--------|---------------|----------|
| Hydroxychloroquine      | 2.710  | 1.443-5.102   | 0.002*   |
| Steroids                | 4.444  | 2.237-8.772   | < 0.001* |
| Ascorbic acid           | 2.639  | 1.370-5.076   | 0.004*   |
| Zinc                    | 3.650  | 1.898-7.042   | < 0.001* |
| Tocilizumab             | 4.525  | 1.403-14.706  | 0.012*   |
| Convalescent plasma     | 4.921  | 2.348-10.314  | < 0.001* |
| Acute kidney injury     | 5.435  | 2.825-10.417  | < 0.001* |
| ARDS                    | 23.256 | 11.236-50.000 | < 0.001* |
| Arrhythmia              | 3.610  | 1.645-7.937   | 0.001*   |
| Superimposed bacteremia | 2.625  | 0.982-6.993   | 0.054    |

ARDS, acute respiratory distress syndrome; BMI, body mass index; CI, confidence interval; ICU, intensive care unit; RRT, renal replacement therapy.

\*statistically significant

†on admission

‡analyses cannot be performed as at least one cell is zero

**Table 3.** Clinical predictors for overall in-hospital mortality using multivariate binary logistic regression analysis.

| Characteristics                                                 | Statistics |               |          |
|-----------------------------------------------------------------|------------|---------------|----------|
|                                                                 | Odds ratio | 95% CI        | P-value  |
| <b>Model 1</b>                                                  |            |               |          |
| Age (per 1-year increment)                                      | 1.075      | 1.045-1.105   | < 0.001* |
| Hypertension                                                    | 1.264      | 0.572-2.793   | 0.562    |
| Chronic kidney disease                                          | 1.232      | 0.590-2.571   | 0.578    |
| Hypoxia (SpO <sub>2</sub> < 95%)                                | 4.630      | 1.934-1.111   | 0.001*   |
| Rales/crackles                                                  | 2.016      | 0.955-4.255   | 0.066    |
| Leukocytosis (WBC > 10,000 /uL)                                 | 2.732      | 1.412-5.263   | 0.003*   |
| Transaminitis (ALT > 3X UNL)                                    | 2.137      | 0.890-5.128   | 0.089    |
| eGFR (per 1.0 mL/min/1.73m <sup>2</sup> decrement) <sup>†</sup> | 1.002      | 0.990-1.013   | 0.795    |
| Ferritin (> 336 ng/mL)                                          | 4.016      | 1.195-13.514  | 0.025*   |
| Lactate dehydrogenase (> 200 U/L)                               | 7.752      | 1.639-37.037  | 0.010*   |
| Procalcitonin (> 0.25 ng/mL)                                    | 2.404      | 1.011-5.714   | 0.047*   |
| Troponin I (> 0.03 ng/mL)                                       | 2.242      | 1.080-4.673   | 0.030*   |
| Opacity/infiltrate on imaging                                   | 3.077      | 1.276-7.407   | 0.012*   |
| Nasal cannula                                                   | 1.883      | 0.799-4.444   | 0.148    |
| High-flow nasal cannula                                         | 4.608      | 2.053-10.309  | < 0.001* |
| NIPPV                                                           | 7.246      | 2.899-18.182  | < 0.001* |
| Mechanical ventilation                                          | 13.889     | 6.211-31.250  | < 0.001* |
| ICU admission/transfer                                          | 13.699     | 6.135-30.303  | < 0.001* |
| RRT                                                             | 21.277     | 5.025-90.909  | < 0.001* |
| Vasopressor                                                     | 22.222     | 9.434-52.632  | < 0.001* |
| Antibiotics                                                     | 17.544     | 2.309-125.000 | 0.006*   |
| ARDS                                                            | 23.810     | 10.204-55.556 | < 0.001* |
| Superimposed bacteremia                                         | 2.041      | 0.645-6.452   | 0.224    |



| <b>Model 2</b>               |       |             |        |
|------------------------------|-------|-------------|--------|
| Azithromycin                 | 1.916 | 0.788-4.651 | 0.152  |
| Hydroxychloroquine           | 1.057 | 0.467-2.392 | 0.894  |
| Ascorbic acid                | 1.008 | 0.440-2.313 | 0.985  |
| Zinc                         | 1.517 | 0.651-3.546 | 0.334  |
| Tocilizumab                  | 1.499 | 0.381-5.917 | 0.562  |
| Convalescent plasma          | 1.513 | 0.600-3.817 | 0.381  |
| <b>Model 3</b>               |       |             |        |
| Respiratory acidosis         | 3.745 | 1.443-9.709 | 0.007* |
| Steroids therapy             | 1.107 | 0.459-2.667 | 0.821  |
| <b>Model 4</b>               |       |             |        |
| Acute kidney injury          | 2.268 | 1.025-5.025 | 0.043* |
| <b>Model 5</b>               |       |             |        |
| Arrhythmias as complications | 1.161 | 0.428-3.155 | 0.769  |

630

631 ARDS, acute respiratory distress syndrome; CAD, coronary artery disease; CKD, chronic kidney disease; CI, confidence interval; COPD, chronic obstructive pulmonary disease; eGFR, estimated glomerular filtration rate; ICU, intensive care unit; NIPPV, non-invasive positive pressure ventilation; RRT, renal replacement therapy.

632 \*statistically significant

Model 1 is adjusted for age, sex, ethnicity and obesity

633 Model 2 is adjusted for age, sex, ethnicity, obesity, need for oxygen therapy, and ICU admission

Model 3 is adjusted for age, sex, ethnicity, obesity, asthma/COPD, need for oxygen therapy, and ICU admission

Model 4 is adjusted for age, sex, ethnicity, obesity, CKD, need for oxygen therapy, and ICU admission

634 Model 5 is adjusted for age, sex, ethnicity, obesity, CAD, heart failure, history of arrhythmia/conduction disorder, and ICU admission

635

636

637

638

639

640

641

642

643

1  
2  
3 644  
4  
5 645  
6  
7 646  
8  
9  
10 647  
11  
12 648  
13  
14 649  
15  
16 650  
17  
18 651  
19  
20 652  
21  
22  
23  
24 653

**Table 4.** Demographics and baseline characteristics of critically ill patients (n = 89).

| Characteristics         | All patients<br>(n = 89) | Survivors<br>(n = 47)    | Non-survivors<br>(n = 42) | P-value  |
|-------------------------|--------------------------|--------------------------|---------------------------|----------|
| Male                    | 61 (68.5)                | 30 (63.8)                | 31 (73.8)                 | 0.365    |
| Age (year)              | 66.0 (14.2) <sup>†</sup> | 69.1 (12.5) <sup>†</sup> | 63.3 (15.2) <sup>†</sup>  | 0.052    |
| SOFA score <sup>‡</sup> | 4.3 (2.0)                | 3.6 (1.7)                | 5.1 (1.9)                 | < 0.001* |
| <b>Ethnicity</b>        |                          |                          |                           |          |
| Caucasian               | 47 (52.8)                | 25 (53.2)                | 22 (52.4)                 | 0.685    |
| African-American        | 25 (28.1)                | 12 (25.5)                | 13 (31.0)                 |          |
| Hispanic/Latino         | 12 (13.5)                | 8 (17.0)                 | 4 (9.5)                   |          |
| Asian                   | 5 (5.6)                  | 2 (4.3)                  | 3 (7.1)                   |          |
| Others                  | -                        | -                        | -                         |          |
| <b>Treatment</b>        |                          |                          |                           |          |
| Azithromycin            | 69 (77.5)                | 34 (72.3)                | 35 (83.3)                 | 0.215    |
| Hydroxychloroquine      | 42 (47.2)                | 23 (48.9)                | 19 (45.2)                 | 0.727    |
| Steroids                | 39 (43.8)                | 19 (40.4)                | 20 (47.6)                 | 0.495    |
| Ascorbic acid           | 39 (43.8)                | 22 (46.8)                | 17 (40.5)                 | 0.548    |
| Zinc                    | 40 (44.9)                | 21 (44.7)                | 19 (45.2)                 | 0.958    |
| Tocilizumab             | 11 (12.4)                | 5 (10.6)                 | 6 (14.3)                  | 0.750    |
| Convalescent plasma     | 30 (33.7)                | 14 (29.8)                | 16 (38.1)                 | 0.408    |
| Remdesivir              | 11 (12.4)                | 6 (12.8)                 | 5 (11.9)                  | 1.000    |
| <b>Complications</b>    |                          |                          |                           |          |
| Acute kidney injury     | 56 (62.9)                | 22 (46.8)                | 34 (81.0)                 | 0.001*   |
| ARDS                    | 47 (52.8)                | 15 (31.9)                | 32 (76.2)                 | < 0.001* |
| Arrhythmias             | 21 (23.6)                | 10 (21.3)                | 11 (26.2)                 | 0.586    |
| QT prolongation         | 16 (18.0)                | 10 (21.3)                | 6 (14.3)                  | 0.391    |
| Venous thromboembolism  | 5 (5.6)                  | 3 (6.4)                  | 2 (4.8)                   | 1.000    |
| Hospital stay (day)     | 13.1 (9.6) <sup>†</sup>  | 10.4 (8.1) <sup>†</sup>  | 15.5 (10.3) <sup>†</sup>  | 0.125    |
| <b>Outcome</b>          |                          |                          |                           |          |

1  
2  
3  
4  
5  
6  
7  
8  
9  
10  
11  
12  
13  
14  
15  
16  
17  
18  
19  
20  
21  
22  
23  
24  
25  
26  
27  
28  
29  
30  
31  
32  
33  
34  
35  
36  
37  
38  
39  
40  
41  
42  
43  
44  
45  
46  
47  
48  
49  
50  
51  
52  
53  
54  
55  
56  
57  
58  
59  
60

|                       |           |
|-----------------------|-----------|
| Recovery/discharge    | 43 (48.3) |
| Remained hospitalized | 2 (2.2)   |
| Death                 | 42 (47.2) |

654  
655

ARDS, acute respiratory distress syndrome; SOFA, Sequential Organ Failure Assessment  
\*statistically significant  
†mean (standard deviation)  
‡collected on the first day of ICU admission

For peer review only

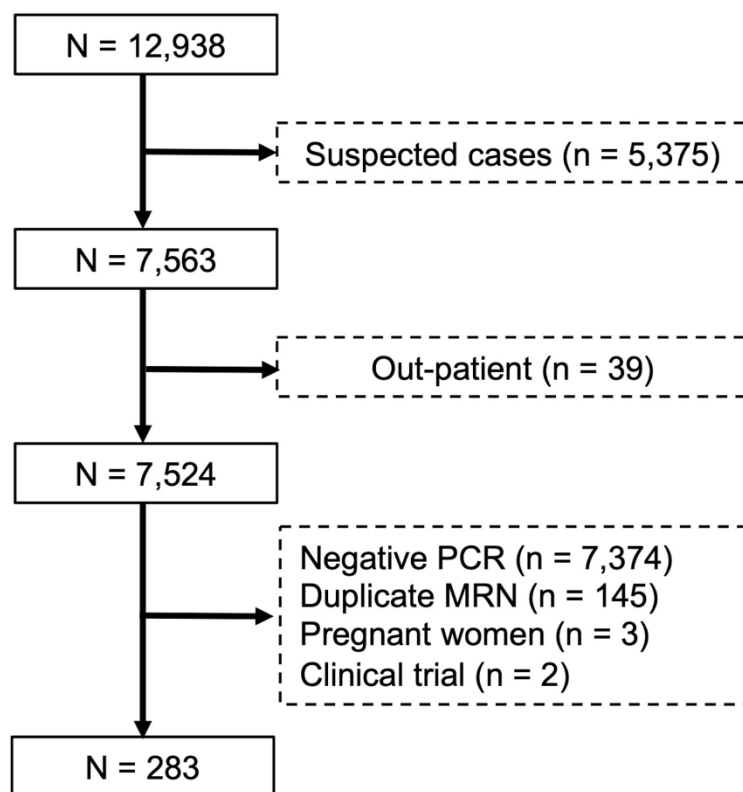

Figure 1. Flowchart of subject selection from UPMC Pinnacle COVID-19 registry from March 1 to May 31, 2020.

203x185mm (300 x 300 DPI)

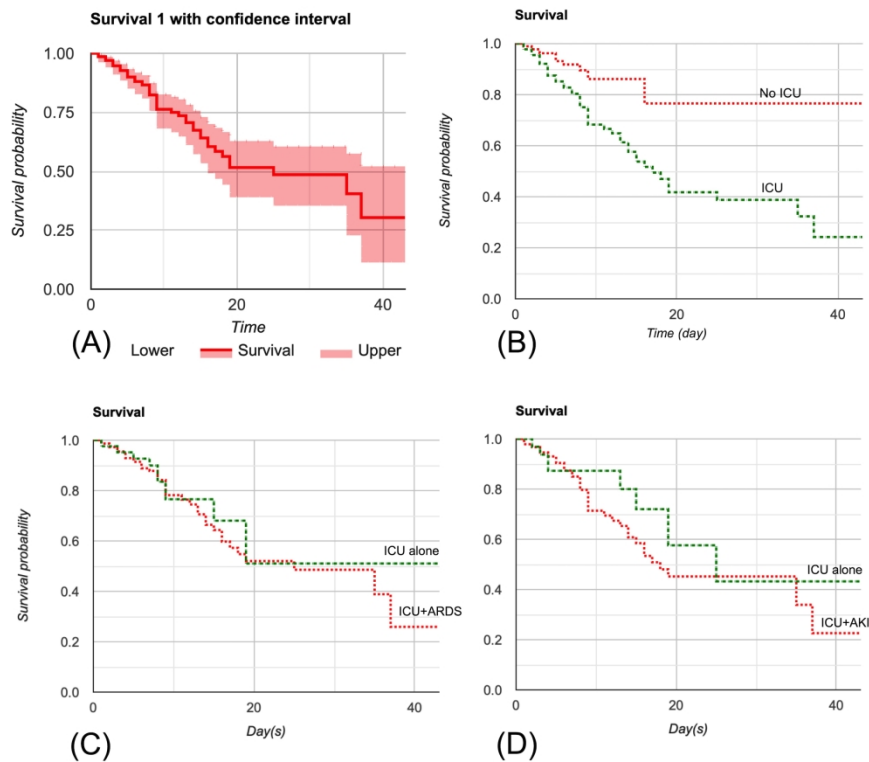

Figure 2. Survival analysis by Kaplan-Meier curves. A) The cumulative survival declined with increasing length of hospital stay. The median survival time was 25 days with standard error (SE) of 7.0. B) ICU patients significantly lower survival probability with mean survival time of 22.3 days (SE 1.8) and 23.0 (SE 1.3) in ICU group vs. non-ICU group, respectively ( $p = 0.002$ ). C) The cumulative survival between ICU patients with and without acute respiratory distress syndrome ( $p = 0.302$ ). D) The cumulative survival between ICU patients with and without acute kidney injury ( $p = 0.504$ ).

254x228mm (300 x 300 DPI)

### Data collection (con't):

The demographic data included age, sex, and ethnicity. Co-morbidities included current/prior history of smoking, obesity (BMI  $\geq 30$  kg/m<sup>2</sup>), hypertension, diabetes mellitus, hyperlipidemia, coronary artery disease, heart failure/cardiomyopathy, arrhythmia, chronic kidney disease, end-stage kidney disease (ESKD), asthma/chronic pulmonary obstructive disease, and cerebrovascular diseases.

Laboratory findings were recorded: leukocytosis (white blood cells count  $> 9,500/\mu\text{L}$ ), leukopenia (white blood cells count  $< 3,900/\mu\text{L}$ ), lymphocytopenia (absolute lymphocytes count  $< 600/\mu\text{L}$ ), thrombocytosis (platelets  $> 400,000/\mu\text{L}$ ), and thrombocytopenia (platelets  $< 140,000/\mu\text{L}$ ), respiratory acidosis (arterial pH  $< 7.35$  and arterial partial pressure of CO<sub>2</sub>  $> 45$  mmHg), transaminitis (alanine transaminase  $> 3$  times of upper normal limit). Serum creatinine (mg/dL) was measured by enzymatic assay. Elevation of serum D-dimer ( $> 500$  ng/mL), ferritin ( $> 336$  ng/mL) lactate dehydrogenase (LDH;  $> 200$  U/L), C-reactive protein ( $> 1$  mg/dL), procalcitonin ( $> 0.25$  ng/mL), and troponin I ( $> 0.03$  ng/mL; Backman Coulter DxI).

Please note that the cutoff values were determined by the National Reference Laboratory.

### **Rationale for multivariate analysis models**

Model 1 is adjusted for the baseline co-morbidities (age, sex, ethnicity, obesity). Some of these co-variables showed significant association with death on univariate analysis. Without these adjustments, the aforementioned co-variables will act as confounding factors.

Model 2 is adjusted for all factors in Model 1 plus “the need for oxygen therapy” because the interventions included in Model 2 (azithromycin, hydroxychloroquine, ascorbic acid, zinc, tocilizumab, convalescent plasma) were usually given in patients who required oxygen therapy. Thus, in this Model, “the need for oxygen therapy” was held constant allowing us to determine if these interventions were associated with death.

For Model 3, “respiratory acidosis, and steroids therapy” are usually seen in patients with asthma, COPD, critical illnesses and those who required oxygen therapy. These factors are potential confounders. Thus, we adjusted this Model for “asthma/COPD”; “the need for oxygen therapy”; and “ICU admission” to determine the true association between the variables and death.

In Model 4, “acute kidney injury” is defined by serum creatinine elevation. Patients with CKD would also have some elevation of serum creatinine levels. Thus, CKD would be a potential confounder. That is why we adjusted the Model for “CKD”; “need for oxygen therapy”; and “ICU admission” as all of these factors may contribute to death.

1  
2  
3 In Model 5, “arrhythmias” is a cardiac complication, hence we adjusted for every variable that  
4 could be the confounding factor, such as CAD, heart failure, history of arrhythmia/conduction  
5 disorder, and ICU admission.  
6  
7  
8  
9  
10  
11  
12  
13  
14  
15  
16  
17  
18  
19  
20  
21  
22  
23  
24  
25  
26  
27  
28  
29  
30  
31  
32  
33  
34  
35  
36  
37  
38  
39  
40  
41  
42  
43  
44  
45  
46  
47  
48  
49  
50  
51  
52  
53  
54  
55  
56  
57  
58  
59  
60

For peer review only



**STROBE 2007 (v4) Statement—Checklist of items that should be included in reports of cohort studies**

| Section/Topic             | Item # | Recommendation                                                                                                                                                                       | Reported on page #                              |
|---------------------------|--------|--------------------------------------------------------------------------------------------------------------------------------------------------------------------------------------|-------------------------------------------------|
| <b>Title and abstract</b> | 1      | (a) Indicate the study’s design with a commonly used term in the title or the abstract                                                                                               | Page 2, Line 31-32                              |
|                           |        | (b) Provide in the abstract an informative and balanced summary of what was done and what was found                                                                                  | Page 2                                          |
| <b>Introduction</b>       |        |                                                                                                                                                                                      |                                                 |
| Background/rationale      | 2      | Explain the scientific background and rationale for the investigation being reported                                                                                                 | Page 4                                          |
| Objectives                | 3      | State specific objectives, including any prespecified hypotheses                                                                                                                     | Page 5, Line 129-131                            |
| <b>Methods</b>            |        |                                                                                                                                                                                      |                                                 |
| Study design              | 4      | Present key elements of study design early in the paper                                                                                                                              | Page 5, Line 134                                |
| Setting                   | 5      | Describe the setting, locations, and relevant dates, including periods of recruitment, exposure, follow-up, and data collection                                                      | Page 6, Line 159-166                            |
| Participants              | 6      | (a) Give the eligibility criteria, and the sources and methods of selection of participants. Describe methods of follow-up                                                           | Page 6, Line 159-166                            |
|                           |        | (b) For matched studies, give matching criteria and number of exposed and unexposed                                                                                                  | N/A                                             |
| Variables                 | 7      | Clearly define all outcomes, exposures, predictors, potential confounders, and effect modifiers. Give diagnostic criteria, if applicable                                             | Page 6, Line 168-183<br>Supplemental Document 1 |
| Data sources/ measurement | 8*     | For each variable of interest, give sources of data and details of methods of assessment (measurement). Describe comparability of assessment methods if there is more than one group | Supplemental Document 1                         |
| Bias                      | 9      | Describe any efforts to address potential sources of bias                                                                                                                            | Page 6, Line 168-169                            |
| Study size                | 10     | Explain how the study size was arrived at                                                                                                                                            | Page 6, Line 159-166                            |
| Quantitative variables    | 11     | Explain how quantitative variables were handled in the analyses. If applicable, describe which groupings were chosen and why                                                         | Page 7, Line 190-196                            |
| Statistical methods       | 12     | (a) Describe all statistical methods, including those used to control for confounding                                                                                                | Page 7-8, Line 189-221                          |
|                           |        | (b) Describe any methods used to examine subgroups and interactions                                                                                                                  | N/A                                             |
|                           |        | (c) Explain how missing data were addressed                                                                                                                                          | Page 7, Line 196                                |
|                           |        | (d) If applicable, explain how loss to follow-up was addressed                                                                                                                       | N/A                                             |

|                          |     |                                                                                                                                                                                                              |                          |
|--------------------------|-----|--------------------------------------------------------------------------------------------------------------------------------------------------------------------------------------------------------------|--------------------------|
|                          |     | (e) Describe any sensitivity analyses                                                                                                                                                                        | Page 8, Line 215-218     |
| <b>Results</b>           |     |                                                                                                                                                                                                              |                          |
| Participants             | 13* | (a) Report numbers of individuals at each stage of study—eg numbers potentially eligible, examined for eligibility, confirmed eligible, included in the study, completing follow-up, and analysed            | Page 8, Line 225-228     |
|                          |     | (b) Give reasons for non-participation at each stage                                                                                                                                                         | N/A                      |
|                          |     | (c) Consider use of a flow diagram                                                                                                                                                                           | Figure 1                 |
| Descriptive data         | 14* | (a) Give characteristics of study participants (eg demographic, clinical, social) and information on exposures and potential confounders                                                                     | Table 1                  |
|                          |     | (b) Indicate number of participants with missing data for each variable of interest                                                                                                                          | N/A                      |
|                          |     | (c) Summarise follow-up time (eg, average and total amount)                                                                                                                                                  | Table 1                  |
| Outcome data             | 15* | Report numbers of outcome events or summary measures over time                                                                                                                                               | Table 1                  |
| Main results             | 16  | (a) Give unadjusted estimates and, if applicable, confounder-adjusted estimates and their precision (eg, 95% confidence interval). Make clear which confounders were adjusted for and why they were included | Table 2-3                |
|                          |     | (b) Report category boundaries when continuous variables were categorized                                                                                                                                    | N/A                      |
|                          |     | (c) If relevant, consider translating estimates of relative risk into absolute risk for a meaningful time period                                                                                             | N/A                      |
| Other analyses           | 17  | Report other analyses done—eg analyses of subgroups and interactions, and sensitivity analyses                                                                                                               | Page 10-11, Line 271-302 |
| <b>Discussion</b>        |     |                                                                                                                                                                                                              |                          |
| Key results              | 18  | Summarise key results with reference to study objectives                                                                                                                                                     | Page 11-16, Line 309-467 |
| <b>Limitations</b>       |     |                                                                                                                                                                                                              |                          |
| Interpretation           | 20  | Give a cautious overall interpretation of results considering objectives, limitations, multiplicity of analyses, results from similar studies, and other relevant evidence                                   | Page 16-17, Line 468-491 |
| Generalisability         | 21  | Discuss the generalisability (external validity) of the study results                                                                                                                                        | Page 17, Line 490-491    |
| <b>Other information</b> |     |                                                                                                                                                                                                              |                          |
| Funding                  | 22  | Give the source of funding and the role of the funders for the present study and, if applicable, for the original study on which the present article is based                                                | Page 19, Line 538        |

\*Give information separately for cases and controls in case-control studies and, if applicable, for exposed and unexposed groups in cohort and cross-sectional studies.

1  
2  
3  
4  
5  
6  
7  
8  
9  
10  
11  
12  
13  
14  
15  
16  
17  
18  
19  
20  
21  
22  
23  
24  
25  
26  
27  
28  
29  
30  
31  
32  
33  
34  
35  
36  
37  
38  
39  
40  
41  
42  
43  
44  
45  
46

**Note:** An Explanation and Elaboration article discusses each checklist item and gives methodological background and published examples of transparent reporting. The STROBE checklist is best used in conjunction with this article (freely available on the Web sites of PLoS Medicine at <http://www.plosmedicine.org/>, Annals of Internal Medicine at <http://www.annals.org/>, and Epidemiology at <http://www.epidem.com/>). Information on the STROBE Initiative is available at [www.strobe-statement.org](http://www.strobe-statement.org).

For peer review only

# BMJ Open

## Clinical Characteristics of Hospitalized COVID-19 Patients and the Impact on Mortality: A Single-network, Retrospective Cohort Study from Pennsylvania State

|                                 |                                                                                                                                                                                                                                                                                     |
|---------------------------------|-------------------------------------------------------------------------------------------------------------------------------------------------------------------------------------------------------------------------------------------------------------------------------------|
| Journal:                        | <i>BMJ Open</i>                                                                                                                                                                                                                                                                     |
| Manuscript ID                   | bmjopen-2020-042549.R2                                                                                                                                                                                                                                                              |
| Article Type:                   | Original research                                                                                                                                                                                                                                                                   |
| Date Submitted by the Author:   | 07-Oct-2020                                                                                                                                                                                                                                                                         |
| Complete List of Authors:       | Gadhiya, Kinjal; UPMC Pinnacle, Department of Internal Medicine<br>Hansrivijit, Panupong ; UPMC Pinnacle, Department of Internal Medicine<br>Gangireddy, Mounika; UPMC Pinnacle, Department of Internal Medicine<br>Goldman, John; UPMC Pinnacle, Department of Infectious Diseases |
| <b>Primary Subject Heading</b>: | Infectious diseases                                                                                                                                                                                                                                                                 |
| Secondary Subject Heading:      | Intensive care                                                                                                                                                                                                                                                                      |
| Keywords:                       | Adult intensive & critical care < INTENSIVE & CRITICAL CARE, INTERNAL MEDICINE, MICROBIOLOGY                                                                                                                                                                                        |
|                                 |                                                                                                                                                                                                                                                                                     |

SCHOLARONE™  
Manuscripts



I, the Submitting Author has the right to grant and does grant on behalf of all authors of the Work (as defined in the below author licence), an exclusive licence and/or a non-exclusive licence for contributions from authors who are: i) UK Crown employees; ii) where BMJ has agreed a CC-BY licence shall apply, and/or iii) in accordance with the terms applicable for US Federal Government officers or employees acting as part of their official duties; on a worldwide, perpetual, irrevocable, royalty-free basis to BMJ Publishing Group Ltd ("BMJ") its licensees and where the relevant Journal is co-owned by BMJ to the co-owners of the Journal, to publish the Work in this journal and any other BMJ products and to exploit all rights, as set out in our [licence](#).

The Submitting Author accepts and understands that any supply made under these terms is made by BMJ to the Submitting Author unless you are acting as an employee on behalf of your employer or a postgraduate student of an affiliated institution which is paying any applicable article publishing charge ("APC") for Open Access articles. Where the Submitting Author wishes to make the Work available on an Open Access basis (and intends to pay the relevant APC), the terms of reuse of such Open Access shall be governed by a Creative Commons licence – details of these licences and which [Creative Commons](#) licence will apply to this Work are set out in our licence referred to above.

Other than as permitted in any relevant BMJ Author's Self Archiving Policies, I confirm this Work has not been accepted for publication elsewhere, is not being considered for publication elsewhere and does not duplicate material already published. I confirm all authors consent to publication of this Work and authorise the granting of this licence.

1  
2  
3 **1 Clinical Characteristics of Hospitalized COVID-19 Patients and the Impact on Mortality:**  
4  
5 **2 A Single-network, Retrospective Cohort Study from Pennsylvania State**  
6

7  
8 3 Kinjal P. Gadhiya,<sup>1\*</sup> Panupong Hansrivijit,<sup>1\*</sup> Mounika Gangireddy,<sup>1\*</sup> John D. Goldman<sup>2</sup>  
9

10 4 \*equivalent contribution  
11

12 5 <sup>1</sup>Department of Internal Medicine, UPMC Pinnacle, Harrisburg, PA 17104, USA;  
13

14 6 [kinjal268@gmail.com](mailto:kinjal268@gmail.com); [hansrivijitp@upmc.edu](mailto:hansrivijitp@upmc.edu); [g.mounikareddy07@gmail.com](mailto:g.mounikareddy07@gmail.com)  
15

16 7 <sup>2</sup>Department of Infectious Diseases, UPMC Pinnacle, Harrisburg, PA 17104, USA;  
17

18 8 [goldmanjd@upmc.edu](mailto:goldmanjd@upmc.edu)  
19  
20

21 9 **Running title:** COVID-19 and Clinical Impact: A Retrospective Study from Pennsylvania State  
22  
23

24 10 **Correspondence**  
25

26 11 Panupong Hansrivijit, M.D.  
27

28 12 205 South Front Street, Suite 3C  
29

30 13 Harrisburg, PA 17104  
31

32 14 [hansrivijitp@upmc.edu](mailto:hansrivijitp@upmc.edu)  
33  
34

35 15 **Keywords:** COVID-19, coronavirus, SARS-CoV-2, mortality, acute kidney injury  
36

37 16 **Word count:** 3,708 (excl. title page, abstract, legend, declarations, and references)  
38

39 17 **Funding:** None declared.  
40  
41

42 18 **Disclosure of Potential Conflicts of Interest:** The authors declared no potential conflicts of  
43  
44 19 interest.  
45  
46

47 20  
48

49 21  
50

51 22  
52

53 23  
54  
55  
56  
57  
58  
59  
60

1  
2  
3 24 **ABSTRACT**  
4

5 25 **Objective:** Coronavirus Disease 2019 (COVID-19) is a respiratory disease caused by severe  
6  
7  
8 26 acute respiratory syndrome coronavirus-2 (SARS-CoV-2) with highest burden in the United  
9  
10 27 States. Data on clinical characteristics of COVID-19 patients in U.S. population are limited.  
11  
12 28 Thus, we aim to determine the clinical characteristics and risk factors for in-hospital mortality  
13  
14 29 from COVID-19.  
15

16  
17 30 **Design:** Retrospective observational study.  
18

19 31 **Setting:** Single-network hospitals in Pennsylvania state.  
20

21 32 **Participants:** Patients with confirmed SARS-CoV-2 infection who were hospitalized from  
22  
23 33 March 1<sup>st</sup> to May 31<sup>st</sup>, 2020.  
24  
25

26 34 **Primary and secondary outcome measures:** Primary outcome was in-hospital mortality.  
27  
28 35 Secondary outcomes were complications, such as acute kidney injury and acute respiratory  
29  
30 36 distress syndrome (ARDS).  
31

32  
33 37 **Results:** Of 283 patients, 19.4% were non-survivors. The mean age of all patients was 64.1 ±  
34  
35 38 15.9 years. 56.2% were male and 50.2% were white. Several factors were identified from our  
36  
37 39 adjusted multivariate analyses to be associated with in-hospital mortality: increasing age (per 1-  
38  
39 40 year increment; OR 1.07 [1.045-1.105]), hypoxia (SpO<sub>2</sub> < 95%; OR 4.630 [1.934-1.111]),  
40  
41 41 opacity/infiltrate on imaging (OR 3.077 [1.276-7.407]), leukocytosis (WBC > 10,000 /uL; OR  
42  
43 42 2.732 [1.412-5.263]), ferritin > 336 ng/mL (OR 4.016 [1.195-13.514]), lactate dehydrogenase >  
44  
45 43 200 U/L (OR 7.752 [1.639-37.037]), procalcitonin > 0.25 ng/mL (OR 2.404 [1.011-5.714]),  
46  
47 44 troponin I > 0.03 ng/mL (OR 2.242 [1.080-4.673]), need for advanced oxygen support other than  
48  
49 45 simple nasal cannula (OR 4.608-13.889 [2.053-31.250]), ICU admission/transfer (OR 13.699  
50  
51 46 [6.135-30.303]), renal replacement therapy (OR 21.277 [5.025-90.909]), need for vasopressor  
52  
53  
54  
55  
56  
57  
58  
59  
60

1  
2  
3 47 (OR 22.222 [9.434-52.632]), acute respiratory distress syndrome (OR 23.810 [10.204-55.556]),  
4  
5 48 respiratory acidosis (OR 7.042 [2.915-16.949]), and acute kidney injury (OR 3.571 [1.715-  
6  
7 49 7.407]). When critically ill patients were analyzed independently, increasing SOFA score (OR  
8  
9 50 1.544 [1.168-2.039]), AKI (OR 2.128 [1.111-6.667]), and ARDS (OR 6.410 [2.237-18.182])  
10  
11 51 were predictive of in-hospital mortality.  
12  
13

14 52 **Conclusion:** We reported the characteristics of ethnically diverse, hospitalized patients with  
15  
16 53 COVID-19 from Pennsylvania state.  
17  
18  
19 54  
20  
21 55  
22  
23

#### 24 56 **Strengths and Limitations of This Study**

- 25
- 26 57 - Individual patient's chart was reviewed.
- 27
- 28 58 - Multivariate analysis (binary logistic regression model) was used to report the results.
- 29
- 30
- 31 59 - Retrospective, observational design.
- 32
- 33 60 - Limited sample size.
- 34
- 35 61 - Only hospitalized patients were included in the studies.
- 36
- 37
- 38 62
- 39
- 40 63
- 41
- 42 64
- 43
- 44 65
- 45
- 46 66
- 47
- 48 67
- 49
- 50 68
- 51
- 52 69
- 53
- 54
- 55
- 56
- 57
- 58
- 59
- 60



## 70 INTRODUCTION

71 Coronavirus Disease 2019 (COVID-19) is a respiratory disease caused by Severe Acute  
72 Respiratory Syndrome Coronavirus-2 (SARS-CoV-2) which has become a pandemic in early  
73 2020. The spread of this virus was originally started in Wuhan, China in December 2019 and  
74 rapidly escalated to 216 countries within five months with the highest number of infected cases  
75 in the United States.<sup>1</sup> As of August 29<sup>th</sup>, 2020, the reported cumulated number of confirmed  
76 cases in the United States was close to 6 million with a mortality rate of 3.09%.<sup>1</sup>

77 As of August 29<sup>th</sup>, 2020, the Pennsylvania Department of Health has announced more  
78 than 129,056 confirmed cases of COVID-19 leading to 7,671 deaths, making Pennsylvania the  
79 13<sup>th</sup> state with the highest confirmed cases.<sup>2</sup> To date, the characteristics of infected patients in the  
80 United States were reported in the state of Washington (n = 21), California (n = 1,299) and New  
81 York (n = 5,700) in chronological order.<sup>3-5</sup> The mortality across the U.S. studies ranged from 6.3  
82 to 24%, depending on the severity of COVID-19. Although the characteristics of hospitalized  
83 COVID-19 patients have been reported in other states, there are some limitations that preclude  
84 the generalization of the results toward our patient population. Studies from Washington and  
85 California were conducted and published during an early stage of the pandemic where treatment  
86 options, such as remdesivir, or dexamethasone were not recommended as the standard of care. In  
87 addition, multivariate analysis was not performed in the New York City cohort. The association  
88 between clinical characteristics and in-hospital mortality in the U.S. population have not been  
89 clearly established.

90 Guan, et al first described the clinical characteristics of 1,099 patients infected with  
91 SARS-CoV-2 across China.<sup>6</sup> In this study, the overall mortality was 1.4%. However, the  
92 association between clinical risk factors and mortality was not described. Later Du et al and

1  
2  
3 93 Zhou et al demonstrated that older age, higher Sequential Organ Failure Assessment (SOFA)  
4  
5 94 score, D-dimer > 1 µg/mL, cardiac troponin I ≥ 0.05 ng/mL, and pre-existing concurrent  
6  
7  
8 95 cardiovascular and cerebrovascular diseases were significant predictors for increased mortality  
9  
10 96 from COVID-19.<sup>7 8</sup> However, these findings were primarily based on Chinese population; thus, it  
11  
12 97 has been unconfirmed if the results can be applicable to other patient populations.

13  
14  
15 98 Clinical management of COVID-19 has been dynamic and variable based on available  
16  
17 99 research, which has largely been *in vitro*, such as a combination of hydroxychloroquine and  
18  
19 100 azithromycin,<sup>9</sup> ascorbic acid,<sup>10</sup> ivermectin,<sup>11</sup> and zinc.<sup>12</sup> These therapies have not been proven  
20  
21 101 beneficial in clinical studies. In the current study, we provide our experience on treatment options  
22  
23 102 for patients infected with SARS-CoV-2.

24  
25  
26 103 In this retrospective cohort, we aimed to demonstrate the clinical characteristics of COVID-  
27  
28 104 19 patients, treatment outcomes and the impact on in-hospital mortality in an ethnically diverse  
29  
30 105 population.

31  
32  
33 106

## 34 35 107 **MATERIALS AND METHODS**

### 36 37 108 ***Study design***

38  
39  
40 109 This is a retrospective cohort study from seven hospitals under UPMC Pinnacle network  
41  
42 110 located across the state of Pennsylvania. The protocol of this study has been approved by UPMC  
43  
44 111 Pinnacle Institutional Review Board and UPMC Pinnacle Ethic Committee (#20E024). Written  
45  
46 112 informed consent was waived due to the retrospective, observational nature of the study. Our  
47  
48 113 current study followed the Declaration of Helsinki.

### 49 50 114 ***Patient and public involvement***

51  
52  
53 115 No patient involvement.

### 116 ***Data source and patient population***

117 Data were collected by extracting electronic medical records from March 1<sup>st</sup> to May 31<sup>th</sup>,  
118 2020 through UPMC Pinnacle COVID-19 registry. Adult patients with age  $\geq 18$  years who were  
119 hospitalized with confirmed SARS-CoV-2 infection by real-time polymerase chain reaction (RT-  
120 PCR) from nasopharyngeal swab were included in this study. We excluded non-hospitalized  
121 patients, patients  $< 18$  years of age, presumed SARS-CoV-2 infection, pregnant women, out-of-  
122 system transfer and patients enrolled in clinical trials. Transfer within the system was considered  
123 one admission. For patients with multiple admissions with study period, the first admission for  
124 COVID-19 was reviewed.

### 125 ***Data collection***

126 Individual patient charts were reviewed by three independent authors to prevent observer  
127 bias. Collected data was divided into: demographics, comorbidities, signs and symptoms,  
128 laboratory findings, radiographic findings, treatments/interventions, complications and outcomes.  
129 *Supplemental Documents 1* summarizes the description of each variable in our cohort as well as  
130 the cutoff values for each variable.

131 The Sequential Organ failure Assessment (SOFA) score<sup>13</sup> was calculated on the first day  
132 of ICU admission. Estimated glomerular filtration rate (eGFR) was calculated using CKD-EPI  
133 equation.<sup>14</sup> Acute kidney injury (AKI) was defined by an increase in serum creatinine by 0.3 mg/dL  
134 (27  $\mu\text{mol/L}$ ) or  $\geq 1.5$  times from the baseline value within 48 hours.<sup>15</sup> Chronic kidney disease  
135 (CKD) was defined by the Kidney Diseases Improving Global Outcomes guidelines.<sup>16</sup> Patients  
136 with history of end stage kidney disease (ESKD) on dialysis prior to admission, were not counted  
137 toward 'requirement of renal replacement therapy (RRT)/hemodialysis (HD)' during the hospital  
138 stay. Acute respiratory distress syndrome (ARDS) was defined by the Berlin criteria.<sup>17</sup>

1  
2  
3 139 Arrhythmias as complications were defined either tachy- or bradyarrhythmia that were new-onset,  
4  
5 140 occurred during hospitalization with COVID-19. In this study, prolongation of QT segment was  
6  
7 141 defined as the QT duration > 500 milliseconds.

### 10 142 ***Study outcomes***

12 143 The primary outcome was in-hospital mortality. The secondary outcome included  
13  
14 144 treatment outcomes and complications such as recovery/discharge, AKI, ARDS, arrhythmias, QT  
15  
16 145 prolongation, venous thromboembolism, arterial thrombosis, cerebrovascular events, heart  
17  
18 146 failure, and myocardial infarction.

### 21 147 ***Statistical analysis***

23 148 All analyses were conducted using SPSS software version 23.0 (IBM Corp., Armonk,  
24  
25 149 NY, USA). Descriptive analyses were reported in percentage for categorical data and in mean  $\pm$   
26  
27 150 standard deviation (S.D.) or median (interquartile range; IQR) depending the data distribution.  
28  
29 151 Comparisons of outcomes for each variable were evaluated using Pearson's  $\chi^2$  tests or Fisher-  
30  
31 152 Exact tests (for categorical data) and two-sample independent t-test (for continuous data). Fisher-  
32  
33 153 Exact tests were opted if the total sample in any cell count was less than five. A p-value less than  
34  
35 154 0.05 is considered statistically significant. Missing data were not included in the analysis.

### 40 155 ***Logistic regression analysis***

42 156 Clinical risk factors that were significant from standard analyses (Pearson's  $\chi^2$  tests, Fisher-  
43  
44 157 Exact tests, t-tests) were included in univariate binary logistic regression analysis. Odds ratios  
45  
46 158 (OR) were reported along with 95% confidence interval (CI). A 95% CI that crosses 1.0 and a p-  
47  
48 159 value of less than 0.05 is considered statistically significant.<sup>18</sup> Variables that remained statistically  
49  
50 160 significant on univariate analysis were included in multivariate analysis using logistic regression  
51  
52 161 method to adjust for other covariates. For the analyses of overall mortality predictors, each variable  
53  
54  
55  
56  
57  
58  
59  
60

1  
2  
3 162 was analyzed by only one model that was adjusted for several potential confounding factors for  
4  
5 163 that particular variable. Model 1 was adjusted for age, sex, ethnicity and obesity. Model 2 was  
6  
7 164 adjusted for age, sex, ethnicity, obesity and need for oxygen therapy. Model 3 is adjusted for age,  
8  
9 165 sex, ethnicity, obesity, asthma/chronic obstructive pulmonary disease (COPD), the need for  
10  
11 166 oxygen therapy, and ICU admission. Model 4 is adjusted for age, sex, ethnicity, obesity, CKD, the  
12  
13 167 need for oxygen therapy, and ICU admission. Model 5 is adjusted for age, sex, ethnicity, obesity,  
14  
15 168 coronary artery disease, heart failure, history of arrhythmia/conduction disorder, and ICU  
16  
17 169 admission. The rationale for each Model adjustment in multivariate analysis is available in  
18  
19 170 *Supplemental Document 2*.

### 171 ***Survival analysis***

172 Kaplan-Meier analysis was used to present the survival by plotting between cumulative  
173 survival against hospital stay in all included patients and in patients requiring ICU.

## 175 **RESULTS**

### 176 ***Baseline characteristics and patient outcomes***

177 A total of 12,938 patients were identified during the study period. Thirty-nine patients were  
178 outpatient and did not require hospitalization. After excluding patients with negative PCR (n =  
179 7,374), duplicate medical records (n = 145), pregnant woman (n = 3), and clinical trial patients (n  
180 = 2), 283 patients were included for further analysis. The flowchart of data selection from the  
181 UPMC Pinnacle COVID-19 registry is depicted in *Figure 1*. *Table 1* summarizes the demographics  
182 and baseline characteristics of included patients. All patients had confirmed SARS-Cov-2 infection  
183 by RT-PCR. Of 283 patients, 80.6% were survivors and 19.4% were non-survivors. The mean age  
184 of all patients was  $64.1 \pm 15.9$  years. 56.2% were male and 50.2% were Caucasian. Non-survivors

1  
2  
3 185 were significantly older and had higher proportion of hypertension, CKD and had lower mean  
4  
5 186 eGFR. Moreover, hypoxia on presentation, rales/crackles on physical examination, leukocytosis,  
6  
7 187 lymphocytopenia, respiratory acidosis, transaminitis, and opacity/infiltrate on imaging were  
8  
9 188 common presentations in non-survivors. Higher inflammatory markers, such as D-dimer, ferritin,  
10  
11 189 lactate dehydrogenase (LDH), C-reactive protein, and procalcitonin were significantly prevalent  
12  
13 190 in deceased patients. The need for oxygen therapy regardless of the mode of oxygen delivery was  
14  
15 191 higher among those who did not survive. Furthermore, non-survivors were more likely to have  
16  
17 192 received intensive care unit (ICU) admission/transfer, extracorporeal membrane oxygenation  
18  
19 193 (ECMO), RRT, use of vasopressors, use of antibiotics, azithromycin, hydroxychloroquine,  
20  
21 194 steroids, ascorbic acid, zinc, tocilizumab and convalescent plasma. Of overall complications, the  
22  
23 195 prevalence of AKI, ARDS, arrhythmias and superimposed bacteremia was significantly higher in  
24  
25 196 non-survivors. There was no significant difference in mean hospital stay between survivors and  
26  
27 197 non-survivors. Up to 78.8% recovered or were discharged from the hospital. Only two patients  
28  
29 198 remained hospitalized as of June 18, 2020. The mean hospital stay was similar between patients  
30  
31 199 who received remdesivir vs. those who did not ( $9.0 \pm 4.7$  and  $7.6 \pm 7.8$  days, respectively;  $p =$   
32  
33 200  $0.359$ ). In contrast, patients who received tocilizumab had significantly longer hospital stay  
34  
35 201 compared to those who did not receive tocilizumab ( $15.3 \pm 11.7$  and  $7.4 \pm 7.2$  days, respectively;  
36  
37 202  $p < 0.001$ ).

### 203 ***Univariate analysis***

204 All factors except superimposed bacteremia remained significant on univariate analysis.  
205 The OR of each clinical predictor for overall in-hospital mortality is depicted in *Table 2*. Logistic  
206 regression analysis cannot be performed on the following variables: D-dimer ( $> 500$  ng/mL), C-  
207 reactive protein ( $> 1$  mg/dL), and the need for ECMO as at least one cell count was zero.

208 Moreover, in a univariate analysis, we found that hydroxychloroquine treatment was associated  
209 with increased risk of QT prolongation (OR 3.401; 95%CI 1.473-7.874; p = 0.002).

### 210 ***Multivariate analysis***

211 Variables that were significant on univariate analysis were included in multivariate logistic  
212 regression analysis (*Table 3*). In Model 1 (adjusted for age, sex, ethnicity, and obesity), increasing  
213 patient age, hypoxia, opacity/infiltrate on imaging, leukocytosis, ferritin > 336 ng/mL, LDH (>  
214 200 U/L), procalcitonin > 0.25 ng/mL, troponin I > 0.03 ng/mL, use of high-flow oxygen nasal  
215 cannula, non-invasive positive pressure ventilation (NIPPV), mechanical ventilation, ICU  
216 admission/transfer, RRT, vasopressor, antibiotics and ARDS were independent risk factors for  
217 increased in-hospital mortality. In Model 2 (adjusted for all variables in Model 1 plus the need for  
218 oxygen therapy, and ICU admission), hydroxychloroquine, ascorbic acid, zinc, and convalescent  
219 plasma were not associated with increased mortality. In Model 3 (adjusted for all variables in  
220 Model 2 plus asthma/COPD), respiratory acidosis was associated with increased mortality.  
221 Moreover, AKI was an independent risk factor for in-hospital mortality from COVID-19 from  
222 Model 4. In addition, we also found that hydroxychloroquine therapy was associated with QT  
223 prolongation (OR 2.874; 95% CI 1.189-6.944; p = 0.019) after adjusted for covariates in Model 2.

### 224 ***Cohort of critically ill patients***

225 A total 89 patients required intensive care during the study period. Of which, 47.2% died.  
226 The demographics and clinical characteristics of critically ill patients are demonstrated in *Table*  
227 *4*. Deceased ICU patients had significantly higher proportion of AKI and ARDS compared to  
228 survived ICU patients. The treatments were similar between survivors and non-survivor patients.  
229 In multivariate analysis, each 1-point increment of SOFA score was associated with increased  
230 death (OR 1.544; 95% CI 1.168-2.039; p 0.002) after adjusted for age, sex, and ethnicity.



1  
2  
3 231 Similarly, AKI (OR 2.128, 95% CI 1.111-6.667;  $p = 0.034$ ) and ARDS (OR 6.410; 95% CI  
4  
5 232 2.237-18.182;  $p = 0.023$ ) are significantly predictive of in-hospital mortality among patients  
6  
7 233 admitted the ICU after adjusted for age, sex, ethnicity, and SOFA score.

### 10 234 *Survival analysis*

12 235 Survival analyses were evaluated using Kaplan-Meier curve of all patients were  
13  
14 236 presented in *Figure 2A*. The median survival time was 25.0 days with standard error of 7.0. The  
15  
16 237 Kaplan-Meier curves for ICU and no ICU patients were illustrated in *Figure 2B*.

18  
19 238

## 21 239 **DISCUSSION**

23  
24 240 In this single-network, retrospective observation study, we found that the overall in-  
25  
26 241 hospital mortality among hospitalized COVID-19 patients was 19.4%. The reported mortality  
27  
28 242 among Chinese cohorts ranged from 11.7% to 28.2%.<sup>7 8 19</sup> However, our reported mortality rates  
29  
30 243 appeared slightly lower than what previously described from New York City.<sup>5</sup> Richardson et al  
31  
32 244 found that the overall mortality of 5,700 hospitalized COVID-19 patients from 12 hospitals in  
33  
34 245 New York City was 21%. However, one could argue that our study has a significantly smaller  
35  
36 246 sample size. Our data need confirmation from other studies with a larger sample size.

37  
38 247 We identified several risk factors for mortality from COVID-19 using multivariate  
39  
40 248 logistic regression analysis. Increasing age, hypoxia and opacity/infiltrate on imaging were  
41  
42 249 associated with higher mortality. Moreover, we also found that patient survival diminished as the  
43  
44 250 disease progressed, reflected by advancement in oxygen delivery (high-flow nasal cannula,  
45  
46 251 NIPPV, and mechanical ventilation). Requiring a simple oxygen nasal cannula did not affect  
47  
48 252 mortality. Such findings are similar to previous literature. Older age is an independent risk factor  
49  
50  
51  
52  
53  
54  
55  
56  
57  
58  
59  
60



1  
2  
3 253 for severe COVID-19 and mortality.<sup>7 20</sup> In line with Zhou et al, increasing oxygen requirement  
4  
5 254 and need for advanced oxygen delivery were predictive of death from COVID-19.<sup>8</sup>  
6

7  
8 255 Here, we showed that COVID-19 patients requiring ICU had 13.7-fold increased risk of  
9  
10 256 mortality. Critically ill patients generally had one or more organs in failure, and an increasing  
11  
12 257 number of organ failure has been linked to elevated death in sepsis patients.<sup>21</sup> For COVID-19  
13  
14 258 patients, we demonstrated that kidney (AKI, and RRT), pulmonary (respiratory acidosis, and  
15  
16 259 ARDS), cardiovascular (vasopressor requirement) failure were predictive of in-hospital  
17  
18 260 mortality. These findings are in line with other cohorts and each factor has been demonstrated as  
19  
20 261 an independent risk factor for mortality in critically ill patients.<sup>8 22-26</sup> Although the complications  
21  
22 262 from SARS-CoV-2 infection can be affected by multiple contributing factors, newer evidence  
23  
24 263 has suggested the significance of cytokine storm leading to multi-organ failure.<sup>27</sup>  
25  
26  
27

28 264 Here, we showed that elevated ferritin, LDH, procalcitonin, leukocytosis, troponin I and  
29  
30 265 possibly D-dimer were associated with increased death. Although, the odds ratio for D-dimer  
31  
32 266 cannot be calculated as one cell was zero, we observed that all deceased patients had elevated D-  
33  
34 267 dimer level and the significance of elevated D-dimer toward in-hospital mortality cannot be  
35  
36 268 ignored. Guan et al first demonstrated the importance of elevated inflammatory markers in  
37  
38 269 COVID-19 in Chinese population<sup>6</sup> which has become a standard monitoring parameter for  
39  
40 270 COVID-19 patients.<sup>28</sup> Elevated inflammatory markers should prompt physicians to evaluate and  
41  
42 271 monitor the patients for cytokine storms and anticipated clinical deterioration. Elevated  
43  
44 272 procalcitonin and leukocytosis may indicate concomitant bacterial infection, which has been  
45  
46 273 shown to increase morbidity and mortality of viral pneumonia.<sup>29</sup> Interestingly, our study showed  
47  
48 274 that elevated troponin I level was associated with significantly higher death similar to a recent  
49  
50 275 meta-analysis.<sup>30</sup> Although the etiologies of elevated troponin levels were not determined in our  
51  
52  
53  
54  
55  
56  
57  
58  
59  
60

1  
2  
3 276 cohort, other studies proposed several mechanisms for elevated troponin level in COVID-19  
4  
5 277 patients. These include myocarditis, cytokine mediated myocardial injury, microangiopathy of  
6  
7 278 small coronary arteries, or silent coronary artery disease.<sup>26 30</sup>

10 279 The pathophysiology of cytokine storm in SARS-CoV-2 is similar to that of other viruses  
11  
12 280 or bacteria.<sup>31</sup> Cytokine storm is characterized by the overproduction of pro-inflammatory  
13  
14 281 cytokines, such as tumor necrosis factor (TNF), IL-6, and IL-1 $\beta$  resulting in an increased  
15  
16 282 vascular hyperpermeability, and activation of multiple coagulation pathways.<sup>27 32</sup> In light of  
17  
18 283 SARS-CoV-2-induced hypercoagulation, antithrombin III, tissue factor pathway inhibitor and  
19  
20 284 the protein C system were impaired during active inflammation.<sup>33</sup> These changes lead to  
21  
22 285 thrombin hyperactivity resulting in the development of microthrombosis, disseminated  
23  
24 286 intravascular coagulation (DIC) and sequential multiorgan failure.<sup>27</sup> Moreover, new studies have  
25  
26 287 revealed the spectrum of hyperferritinemic syndromes induced by SARS-CoV-2 but they are  
27  
28 288 beyond the scope of our article.<sup>34</sup> Such syndromes include macrophage activation syndrome,  
29  
30 289 adult-onset Still's disease, and catastrophic anti-phospholipid syndrome.<sup>34</sup>

33 290 Hydroxychloroquine therapy was associated with a 3-fold increased risk of QT  
34  
35 291 prolongation but not associated with increased risk of death. The concept of using  
36  
37 292 hydroxychloroquine in COVID-19 patients derived from an early *in vitro* study.<sup>35</sup> The results  
38  
39 293 from small non-randomized clinical trials also showed promising effects on viral load  
40  
41 294 reduction.<sup>36 37</sup> However, the clinical benefit of hydroxychloroquine was debated by a large  
42  
43 295 observation study. Of 1,446 patients, Geleris et al observed that hydroxychloroquine had no  
44  
45 296 effect on the death, length of stay or intubation.<sup>38</sup> A recent multicenter, randomized, open-label,  
46  
47 297 controlled trial in hospitalized patients with mild-to-moderate COVID-19 found that the use of  
48  
49 298 hydroxychloroquine, alone or with azithromycin did not improve the clinical outcome at 15 days  
50  
51  
52  
53  
54  
55  
56  
57  
58  
59  
60

1  
2  
3 299 compared to the standard treatment.<sup>39</sup> Thus, the recommendation for use of hydroxychloroquine  
4  
5 300 was recalled by the Infectious Diseases Society of America (IDSA) due to small sample size in  
6  
7 301 previous clinical trials and concern for cardiac adverse effects, such as QT prolongation/torsade  
8  
9  
10 302 de pointe.<sup>40</sup>

11  
12 303 A meta-analysis of four randomized trials and one retrospective study showed that the  
13  
14 304 administration of intravenous vitamin C has vasopressor sparing effects and may reduce the need  
15  
16 305 for mechanical ventilation in critically ill patients while there was no effect on the mortality.<sup>41</sup>  
17  
18 306 However, given the lack of more supporting evidence, the standard use of ascorbic acid is not yet  
19  
20 307 recommended especially in COVID-19 patients. A new clinical trial investigating the treatment  
21  
22 308 outcome of vitamin C in severe COVID-19 is underway (NCT04264533).

23  
24  
25  
26 309 Although our study also showed that zinc supplementation was not associated with  
27  
28 310 increased mortality in COVID-19 patients, the routine use of zinc supplementation could not be  
29  
30 311 supported due to lack of randomized controlled trials. A Brazilian study revealed that plasma  
31  
32 312 zinc concentration in critically ill patients upon admission to the ICU was low and may make  
33  
34 313 these patients more susceptible to oxidative stress.<sup>42</sup> Another prospective study showed that zinc  
35  
36 314 supplementation in mechanically ventilated patients was related to less ventilator-associated  
37  
38 315 pneumonia.<sup>43</sup> However, the mean duration of intubation in this study was prolonged (29 days),  
39  
40 316 making it inconclusive if zinc supplementation can prevent pneumonia development in short-  
41  
42 317 term intubation.

43  
44  
45  
46 318 Steroid therapy in COVID-19 patients was not associated with increased mortality. A  
47  
48 319 meta-analysis of 42 randomized controlled trials consisting of 10,194 patients has shown that  
49  
50 320 corticosteroids possibly result in a small reduction in mortality and an increased risk of  
51  
52 321 neuromuscular weakness among critically ill patients with sepsis.<sup>44</sup> However, the theoretical  
53  
54  
55  
56  
57  
58  
59  
60

1  
2  
3 322 concept for corticosteroid use in COVID-19 was to reduce cytokine storm caused by a reaction  
4  
5 323 to SARS-CoV-2 infection.<sup>45</sup> In early April 2020, the IDSA recommended against a routine use of  
6  
7 324 corticosteroids in the treatment of COVID-19 due to lack of evidence.<sup>40</sup> This guidelines was  
8  
9  
10 325 updated on June 25<sup>th</sup>, 2020 after the results of the RECOVERY trial was released showing that  
11  
12 326 patients who received dexamethasone were more likely to be discharged from hospital at 28 days  
13  
14  
15 327 compared to non-steroids group.<sup>46</sup> Thus, currently, the IDSA panel suggests glucocorticoids use  
16  
17 328 in hospitalized patients with severe COVID-19.<sup>40</sup> Here, our study is in line with the  
18  
19 329 recommendation from the IDSA.

20  
21 330 We have observed that remdesivir and tocilizumab were not associated with mortality  
22  
23 331 and there was no significant improvement in hospital length of stay between patients receiving  
24  
25 332 these drugs. However, given the observational, non-randomized design of this study, it is  
26  
27 333 difficult to determine the efficacy of such treatment. Recently, the preliminary report from a  
28  
29 334 phase III randomized controlled trial revealed that remdesivir was superior to placebo in  
30  
31 335 shortening the time to recovery in adults hospitalized with COVID-19.<sup>47</sup> Several retrospective  
32  
33 336 studies reported that tocilizumab, an IL-6 inhibitor, was shown to reduce the levels of serum  
34  
35 337 inflammatory markers. However, the impact on clinical improvement and mortality remained  
36  
37 338 inconclusive.<sup>48-50</sup> Although we reported no significant clinical benefits from tocilizumab, the  
38  
39 339 consideration for compassionate use of tocilizumab is not discouraged but rather dependent on  
40  
41 340 the judgment of clinicians based on current evidence. A phase 2 (TOCIVID-19; NCT04317092)  
42  
43 341 and 3 randomized controlled trial (COVACTA; NCT04320615) of tocilizumab is being  
44  
45 342 investigated for the treatment of COVID-19 pneumonia. The preliminary results are expected to  
46  
47 343 release in late 2020.

1  
2  
3 344 Similarly, we found that convalescent plasma was not associated with in-hospital  
4  
5 345 mortality. The safety of convalescent plasma was demonstrated in a single-center retrospective  
6  
7 346 cohort of 25 patients<sup>51</sup> and in a preprint, non-peer review report.<sup>52</sup> However, the efficacy of  
8  
9  
10 347 convalescent plasma remained undetermined due to lack of control group. The IDSA panel has  
11  
12 348 recommended convalescent plasma only in the context of a clinical trials. However, at our  
13  
14 349 institution, convalescent plasma is considered if patients have severe symptoms and have  
15  
16 350 contraindications to remdesivir, such as AKI and hepatic dysfunction. Although we did not  
17  
18  
19 351 observe mortality adverse effect from convalescent plasma, the final recommendations on its  
20  
21 352 efficacy and safety are dependent on the randomized controlled trials. To date, at least one  
22  
23 353 randomized controlled trial (NCT04342182) is being investigated to establish the clinical  
24  
25 354 benefits in hospitalized patients with severe COVID-19.

26  
27  
28 355 From our ICU cohort, the SOFA score, AKI and ARDS were the only variables that were  
29  
30 356 predictive of mortality among patients admitted to the ICU. Interestingly, all treatment measures  
31  
32 357 had no effect on mortality once patients were critically ill and required ICU. This could imply  
33  
34 358 that these treatment interventions might be beneficial if given prior to clinical decompensation or  
35  
36 359 ICU transfer. However, interpretation is restricted due to small sample size and examining only  
37  
38 360 critically ill patients. Our hypothesis should be substantiated by studies from other institutions  
39  
40 361 with larger sample sizes.

41  
42 362 Our study has some limitations. The observational design made the results susceptible to  
43  
44 363 selection bias. Analyses could be underpowered given the small sample size. Moreover, due to  
45  
46 364 restricted availability, not many cases had received compassionate use of tocilizumab, remdesivir,  
47  
48 365 and convalescent plasma, which may limit the applicability of our findings. More importantly, the  
49  
50 366 mortality can be affected by confounding factors. We minimize this risk by applying multivariate  
51  
52  
53  
54  
55  
56  
57  
58  
59  
60

1  
2  
3 367 analysis with models designed to cover all possible confounding factors for each analyzed variable.  
4  
5 368 Most of the collected data were cross sectional, thus, making it difficult to conclude the causality  
6  
7  
8 369 between the two variables. Furthermore, our binary logistic regression analyses may not strictly  
9  
10 370 follow the one-in-ten rule which may lead to over-fitting effect. However, our statistical rationale  
11  
12 371 is supported by newer simulation studies by McCulloch et al.,<sup>53</sup> and Smeden et al.<sup>54</sup> The length of  
13  
14 372 stay was computed in the Kaplan-Meier analysis to represent the time to death. It is worth noting  
15  
16 373 that the non-survivors had a curtailed length of stay. Moreover, we advised the readers to consider  
17  
18 374 their patient population to determine the applicability of our results.

19  
20  
21 375 In conclusion, COVID-19 is a serious condition with a significant in-hospital mortality  
22  
23 376 rate. Multiple risk factors for in-hospital death were identified. Increasing SOFA score, AKI and  
24  
25 377 ARDS are significant risk factors for increased death in critically ill patients.

26  
27  
28 378

### 29 30 31 379 **Acknowledgement**

32  
33 380 We would like to thank UPMC Pinnacle IT support for medical record procurement and Mrs.  
34  
35 381 Yijin Wert for constructing the Kaplan-Meier curves.

36  
37 382

38  
39 383

40  
41 384

42  
43 385

44  
45 386

46  
47 387

48  
49 388

50  
51 389

1  
2  
3 3904  
5 3916  
7 3928  
9 393

10  
11  
12 394 **Figure 1.** Flowchart of subject selection from UPMC Pinnacle COVID-19 registry from March 1  
13  
14  
15 395 to May 31, 2020.

16  
17 396 **Figure 2.** Survival analysis by Kaplan-Meier curves. **A)** The cumulative survival declined with  
18  
19 397 increasing length of hospital stay. The median survival time was 25 days with standard error (SE)  
20  
21 398 of 7.0. **B)** ICU patients significantly lower survival probability with mean survival time of 22.3  
22  
23 399 days (SE 1.8) and 23.0 (SE 1.3) in ICU group vs. non-ICU group, respectively ( $p = 0.002$ ). **C)** The  
24  
25 400 cumulative survival between ICU patients with and without acute respiratory distress syndrome ( $p$   
26  
27 401 = 0.302). **D)** The cumulative survival between ICU patients with and without acute kidney injury  
28  
29 402 ( $p = 0.504$ ).  
30  
31 403  
32  
33 404  
34  
35 405  
36  
37 406  
38  
39 407  
40  
41 408  
42  
43 409  
44  
45 410  
46  
47 411  
48  
49 412  
50  
51  
52  
53  
54  
55  
56  
57  
58  
59  
60

1  
2  
3 413  
4  
5 414  
6  
7  
8 415  
9  
10 416  
11  
12 417  
13  
14  
15 418  
16  
17 419  
18  
19 420  
20  
21 421  
22  
23 422  
24  
25 423  
26  
27 424  
28  
29 425  
30  
31 426  
32  
33 427  
34  
35 428  
36  
37 429  
38  
39 430  
40  
41 431  
42  
43 432  
44  
45 433  
46  
47 434  
48  
49 435  
50  
51  
52  
53  
54  
55  
56  
57  
58  
59  
60

## DECLARATIONS

**Funding:** None

**Disclosure of Potential Conflicts of Interest:** The authors declared no potential conflicts of interest.

**Ethics Approval:** UPMC Pinnacle Ethic Committee approved this study (#20E024).

**Informed Consent:** Not applicable.

**Data availability:** Raw data are available upon reasonable request.

**Authors' contributions:** K.P.G., P.H., M.G. collected the data. P.H. analyzed the data. K.P.G., P.H., and J.D.G. drafted the manuscript. All authors edited and approved the manuscript for submission.



436

437

438

439

440

441

442

443

444

445

446

447

448

449

450

451

452

453

454

455

456

457

458

459

460

461

462

463

464

465

466

467

468

469

470

471

472

473

474

475

476

477

478

479

## REFERENCES

1. WHO. Coronavirus disease (COVID-19) pandemic. <https://www.who.int/emergencies/diseases/novel-coronavirus-2019>. Accessed on August 29th 2020
2. Department of Health. COVID-19 Data for Pennsylvania. <https://www.health.pa.gov/topics/disease/coronavirus/Pages/Cases.aspx>. Accessed on August 29th
3. Arentz M, Yim E, Klaff L, et al. Characteristics and Outcomes of 21 Critically Ill Patients With COVID-19 in Washington State. *JAMA* 2020;323(16):1612-14. doi: 10.1001/jama.2020.4326
4. Myers LC, Parodi SM, Escobar GJ, et al. Characteristics of Hospitalized Adults With COVID-19 in an Integrated Health Care System in California. *Jama* 2020 doi: 10.1001/jama.2020.7202 [published Online First: 2020/04/25]
5. Richardson S, Hirsch JS, Narasimhan M, et al. Presenting Characteristics, Comorbidities, and Outcomes Among 5700 Patients Hospitalized With COVID-19 in the New York City Area. *Jama* 2020;323(20):2052-9. doi: 10.1001/jama.2020.6775 [published Online First: 2020/04/23]
6. Guan W-j, Ni Z-y, Hu Y, et al. Clinical Characteristics of Coronavirus Disease 2019 in China. *New England Journal of Medicine* 2020;382(18):1708-20. doi: 10.1056/NEJMoa2002032
7. Du RH, Liang LR, Yang CQ, et al. Predictors of mortality for patients with COVID-19 pneumonia caused by SARS-CoV-2: a prospective cohort study. *Eur Respir J* 2020;55(5) doi: 10.1183/13993003.00524-2020 [published Online First: 2020/04/10]
8. Zhou F, Yu T, Du R, et al. Clinical course and risk factors for mortality of adult inpatients with COVID-19 in Wuhan, China: a retrospective cohort study. *Lancet* 2020;395(10229):1054-62. doi: 10.1016/s0140-6736(20)30566-3 [published Online First: 2020/03/15]
9. Gautret P, Lagier JC, Parola P, et al. Hydroxychloroquine and azithromycin as a treatment of COVID-19: results of an open-label non-randomized clinical trial. *Int J Antimicrob Agents* 2020:105949.
10. Fowler AA, 3rd, Truwit JD, Hite RD, et al. Effect of Vitamin C Infusion on Organ Failure and Biomarkers of Inflammation and Vascular Injury in Patients With Sepsis and Severe Acute Respiratory Failure: The CITRIS-ALI Randomized Clinical Trial. *Jama* 2019;322(13):1261-70. doi: 10.1001/jama.2019.11825 [published Online First: 2019/10/02]
11. Caly L, Druce JD, Catton MG, et al. The FDA-approved drug ivermectin inhibits the replication of SARS-CoV-2 in vitro. *Antiviral Res* 2020;178:104787. doi: 10.1016/j.antiviral.2020.104787 [published Online First: 2020/04/07]
12. te Velthuis AJ, van den Worm SH, Sims AC, et al. Zn(2+) inhibits coronavirus and arterivirus RNA polymerase activity in vitro and zinc ionophores block the replication of these viruses in cell culture. *PLoS Pathog* 2010;6(11):e1001176. doi: 10.1371/journal.ppat.1001176 [published Online First: 2010/11/17]

- 1  
2  
3 480 13. Ferreira FL, Bota DP, Bross A, et al. Serial evaluation of the SOFA score to predict outcome  
4 481 in critically ill patients. *Jama* 2001;286(14):1754-8. doi: 10.1001/jama.286.14.1754  
5 482 [published Online First: 2001/10/12]  
6  
7 483 14. Levey AS, Stevens LA, Schmid CH, et al. A new equation to estimate glomerular filtration  
8 484 rate. *Ann Intern Med* 2009;150(9):604-12. doi: 10.7326/0003-4819-150-9-200905050-  
9 485 00006 [published Online First: 2009/05/06]  
10 486 15. Khwaja A. KDIGO clinical practice guidelines for acute kidney injury. *Nephron Clin Pract*  
11 487 2012;120(4):c179-84. doi: 10.1159/000339789 [published Online First: 2012/08/15]  
12 488 16. KDIGO clinical practice guideline for the diagnosis, evaluation, prevention, and treatment of  
13 489 Chronic Kidney Disease-Mineral and Bone Disorder (CKD-MBD). *Kidney Int Suppl*  
14 490 2009(113):S1-130. doi: 10.1038/ki.2009.188 [published Online First: 2009/08/01]  
15  
16 491 17. Ferguson ND, Fan E, Camporota L, et al. The Berlin definition of ARDS: an expanded  
17 492 rationale, justification, and supplementary material. *Intensive Care Med*  
18 493 2012;38(10):1573-82. doi: 10.1007/s00134-012-2682-1 [published Online First:  
19 494 2012/08/29]  
20 495 18. Hazra A. Using the confidence interval confidently. *J Thorac Dis* 2017;9(10):4125-30. doi:  
21 496 10.21037/jtd.2017.09.14  
22 497 19. Cheng Y, Luo R, Wang K, et al. Kidney disease is associated with in-hospital death of  
23 498 patients with COVID-19. *Kidney Int* 2020;97(5):829-38. doi: 10.1016/j.kint.2020.03.005  
24 499 [published Online First: 2020/04/06]  
25 500 20. Li X, Xu S, Yu M, et al. Risk factors for severity and mortality in adult COVID-19 inpatients  
26 501 in Wuhan. *J Allergy Clin Immunol* 2020 doi: 10.1016/j.jaci.2020.04.006 [published  
27 502 Online First: 2020/04/16]  
28  
29 503 21. Gustot T. Multiple organ failure in sepsis: prognosis and role of systemic inflammatory  
30 504 response. *Curr Opin Crit Care* 2011;17(2):153-9. doi: 10.1097/MCC.0b013e328344b446  
31 505 [published Online First: 2011/02/25]  
32 506 22. Elseviers MM, Lins RL, Van der Niepen P, et al. Renal replacement therapy is an  
33 507 independent risk factor for mortality in critically ill patients with acute kidney injury. *Crit*  
34 508 *Care* 2010;14(6):R221. doi: 10.1186/cc9355 [published Online First: 2010/12/03]  
35  
36 509 23. Martin C, Viviani X, Leone M, et al. Effect of norepinephrine on the outcome of septic  
37 510 shock. *Crit Care Med* 2000;28(8):2758-65. doi: 10.1097/00003246-200008000-00012  
38 511 [published Online First: 2000/08/31]  
39 512 24. Wang CY, Calfee CS, Paul DW, et al. One-year mortality and predictors of death among  
40 513 hospital survivors of acute respiratory distress syndrome. *Intensive Care Med*  
41 514 2014;40(3):388-96. doi: 10.1007/s00134-013-3186-3 [published Online First:  
42 515 2014/01/18]  
43  
44 516 25. Combes A, Costa MA, Trouillet JL, et al. Morbidity, mortality, and quality-of-life outcomes  
45 517 of patients requiring  $\geq 14$  days of mechanical ventilation. *Crit Care Med*  
46 518 2003;31(5):1373-81. doi: 10.1097/01.Ccm.0000065188.87029.C3 [published Online  
47 519 First: 2003/05/29]  
48  
49 520 26. Li J-W, Han T-W, Woodward M, et al. The impact of 2019 novel coronavirus on heart  
50 521 injury: A Systematic review and Meta-analysis. *Progress in Cardiovascular Diseases*  
51 522 2020 doi: <https://doi.org/10.1016/j.pcad.2020.04.008>  
52  
53 523 27. Jose RJ, Manuel A. COVID-19 cytokine storm: the interplay between inflammation and  
54 524 coagulation. *Lancet Respir Med* 2020;8(6):e46-e47. doi: 10.1016/s2213-2600(20)30216-  
55 525 2 [published Online First: 2020/05/01]  
56  
57  
58  
59  
60

- 1  
2  
3 526 28. Annane D, Pastores SM, Rochweg B, et al. Guidelines for the Diagnosis and Management  
4 527 of Critical Illness-Related Corticosteroid Insufficiency (CIRCI) in Critically Ill Patients  
5 528 (Part I): Society of Critical Care Medicine (SCCM) and European Society of Intensive  
6 529 Care Medicine (ESICM) 2017. *Crit Care Med* 2017;45(12):2078-88. doi:  
7 530 10.1097/ccm.0000000000002737 [published Online First: 2017/09/25]  
8 531 29. Morris DE, Cleary DW, Clarke SC. Secondary Bacterial Infections Associated with  
9 532 Influenza Pandemics. *Front Microbiol* 2017;8:1041. doi: 10.3389/fmicb.2017.01041  
10 533 [published Online First: 2017/07/12]  
11 534 30. Vrsalovic M, Vrsalovic Presecki A. Cardiac troponins predict mortality in patients with  
12 535 COVID-19: A meta-analysis of adjusted risk estimates. *J Infect* 2020 doi:  
13 536 10.1016/j.jinf.2020.05.022 [published Online First: 2020/05/18]  
14 537 31. Tisoncik JR, Korth MJ, Simmons CP, et al. Into the eye of the cytokine storm. *Microbiol Mol*  
15 538 *Biol Rev* 2012;76(1):16-32. doi: 10.1128/mubr.05015-11 [published Online First:  
16 539 2012/03/07]  
17 540 32. Meduri GU, Kohler G, Headley S, et al. Inflammatory cytokines in the BAL of patients with  
18 541 ARDS. Persistent elevation over time predicts poor outcome. *Chest* 1995;108(5):1303-  
19 542 14. doi: 10.1378/chest.108.5.1303 [published Online First: 1995/11/01]  
20 543 33. José RJ, Williams AE, Chambers RC. Proteinase-activated receptors in fibroproliferative  
21 544 lung disease. *Thorax* 2014;69(2):190-2. doi: 10.1136/thoraxjnl-2013-204367 [published  
22 545 Online First: 2013/11/05]  
23 546 34. Colafrancesco S, Alessandri C, Conti F, et al. COVID-19 gone bad: A new character in the  
24 547 spectrum of the hyperferritinemic syndrome? *Autoimmun Rev* 2020;19(7):102573. doi:  
25 548 10.1016/j.autrev.2020.102573 [published Online First: 2020/05/11]  
26 549 35. Biot C, Daher W, Chavain N, et al. Design and synthesis of hydroxyferroquine derivatives  
27 550 with antimalarial and antiviral activities. *J Med Chem* 2006;49(9):2845-9. doi:  
28 551 10.1021/jm0601856 [published Online First: 2006/04/28]  
29 552 36. Gao J, Tian Z, Yang X. Breakthrough: Chloroquine phosphate has shown apparent efficacy  
30 553 in treatment of COVID-19 associated pneumonia in clinical studies. *Bioscience trends*  
31 554 2020  
32 555 37. Gautret P, Lagier JC, Parola P, et al. Hydroxychloroquine and azithromycin as a treatment of  
33 556 COVID-19: results of an open-label non-randomized clinical trial. *Int J Antimicrob*  
34 557 *Agents* 2020:105949. doi: 10.1016/j.ijantimicag.2020.105949 [published Online First:  
35 558 2020/03/25]  
36 559 38. Geleris J, Sun Y, Platt J, et al. Observational Study of Hydroxychloroquine in Hospitalized  
37 560 Patients with Covid-19. *N Engl J Med* 2020;382(25):2411-18. doi:  
38 561 10.1056/NEJMoa2012410 [published Online First: 2020/05/08]  
39 562 39. Cavalcanti AB, Zampieri FG, Rosa RG, et al. Hydroxychloroquine with or without  
40 563 Azithromycin in Mild-to-Moderate Covid-19. *New England Journal of Medicine* 2020  
41 564 doi: 10.1056/NEJMoa2019014  
42 565 40. Bhimraj A, Morgan RL, Shumaker AH, et al. Infectious Diseases Society of America  
43 566 Guidelines on the Treatment and Management of Patients with COVID-19. *Clin Infect*  
44 567 *Dis* 2020 doi: 10.1093/cid/ciaa478 [published Online First: 2020/04/28]  
45 568 41. Zhang M, Jativa DF. Vitamin C supplementation in the critically ill: A systematic review and  
46 569 meta-analysis. *SAGE Open Med* 2018;6:2050312118807615. doi:  
47 570 10.1177/2050312118807615 [published Online First: 2018/10/27]  
48  
49  
50  
51  
52  
53  
54  
55  
56  
57  
58  
59

- 1  
2  
3 571 42. Cirino Ruocco MA, Pacheco Cechinatti ED, Barbosa F, Jr., et al. Zinc and selenium status in  
4 572 critically ill patients according to severity stratification. *Nutrition* 2018;45:85-89. doi:  
5 573 10.1016/j.nut.2017.07.009 [published Online First: 2017/11/14]  
6  
7 574 43. Hasanzadeh Kiabi F, Alipour A, Darvishi-Khezri H, et al. Zinc Supplementation in Adult  
8 575 Mechanically Ventilated Trauma Patients is Associated with Decreased Occurrence of  
9 576 Ventilator-associated Pneumonia: A Secondary Analysis of a Prospective, Observational  
10 577 Study. *Indian J Crit Care Med* 2017;21(1):34-39. doi: 10.4103/0972-5229.198324  
11 578 [published Online First: 2017/02/16]  
12 579 44. Annetta M, Maviglia R, Proietti R, et al. Use of corticosteroids in critically ill septic patients  
13 580 : a review of mechanisms of adrenal insufficiency in sepsis and treatment. *Curr Drug*  
14 581 *Targets* 2009;10(9):887-94. doi: 10.2174/138945009789108792 [published Online First:  
15 582 2009/10/06]  
16  
17 583 45. Scaroni C, Armigliato M, Cannavò S. COVID-19 outbreak and steroids administration: are  
18 584 patients treated for Sars-Cov-2 at risk of adrenal insufficiency? *J Endocrinol Invest*  
19 585 2020:1-2. doi: 10.1007/s40618-020-01253-1 [published Online First: 2020/04/18]  
20 586 46. Dexamethasone in Hospitalized Patients with Covid-19 — Preliminary Report. *New England*  
21 587 *Journal of Medicine* 2020 doi: 10.1056/NEJMoa2021436  
22  
23 588 47. Beigel JH, Tomashek KM, Dodd LE, et al. Remdesivir for the Treatment of Covid-19 —  
24 589 Preliminary Report. *New England Journal of Medicine* 2020 doi:  
25 590 10.1056/NEJMoa2007764  
26 591 48. Luo P, Liu Y, Qiu L, et al. Tocilizumab treatment in COVID-19: A single center experience.  
27 592 *J Med Virol* 2020;92(7):814-18. doi: 10.1002/jmv.25801 [published Online First:  
28 593 2020/04/08]  
29 594 49. Alattar R, Ibrahim TBH, Shaar SH, et al. Tocilizumab for the treatment of severe coronavirus  
30 595 disease 2019. *J Med Virol* 2020 doi: 10.1002/jmv.25964 [published Online First:  
31 596 2020/05/06]  
32  
33 597 50. Campochiaro C, Della-Torre E, Cavalli G, et al. Efficacy and safety of tocilizumab in severe  
34 598 COVID-19 patients: a single-centre retrospective cohort study. *Eur J Intern Med*  
35 599 2020;76:43-49. doi: 10.1016/j.ejim.2020.05.021 [published Online First: 2020/06/03]  
36 600 51. Salazar E, Perez KK, Ashraf M, et al. Treatment of Coronavirus Disease 2019 (COVID-19)  
37 601 Patients with Convalescent Plasma. *Am J Pathol* 2020 doi: 10.1016/j.ajpath.2020.05.014  
38 602 [published Online First: 2020/05/31]  
39 603 52. Joyner M, Wright RS, Fairweather D, et al. Early Safety Indicators of COVID-19  
40 604 Convalescent Plasma in 5,000 Patients. *medRxiv* 2020:2020.05.12.20099879. doi:  
41 605 10.1101/2020.05.12.20099879  
42  
43 606 53. Vittinghoff E, McCulloch CE. Relaxing the Rule of Ten Events per Variable in Logistic and  
44 607 Cox Regression. *American Journal of Epidemiology* 2007;165(6):710-18. doi:  
45 608 10.1093/aje/kwk052  
46  
47 609 54. van Smeden M, de Groot JAH, Moons KGM, et al. No rationale for 1 variable per 10 events  
48 610 criterion for binary logistic regression analysis. *BMC Medical Research Methodology*  
49 611 2016;16(1):163. doi: 10.1186/s12874-016-0267-3  
50 612  
51  
52  
53 613  
54  
55 614  
56  
57  
58  
59  
60



615

616

617 **Table 1.** Demographics and baseline characteristics of included patients.

| Characteristics                       | All patients<br>(n = 283) | Survivors<br>(n = 228)   | Non-survivors<br>(n = 55) | P-value  |
|---------------------------------------|---------------------------|--------------------------|---------------------------|----------|
| Male                                  | 159 (56.2)                | 125 (54.8)               | 34 (61.8)                 | 0.348    |
| Age (year)                            | 64.1 (15.9) <sup>†</sup>  | 61.9 (15.8) <sup>†</sup> | 72.8 (13.5) <sup>†</sup>  | < 0.001* |
| <b>Ethnicity</b>                      |                           |                          |                           |          |
| Caucasian                             | 143 (50.5)                | 111 (48.7)               | 32 (58.2)                 | 0.705    |
| African-American                      | 88 (31.1)                 | 73 (32.0)                | 15 (27.3)                 |          |
| Hispanic/Latino                       | 32 (11.3)                 | 27 (11.8)                | 5 (9.1)                   |          |
| Asian                                 | 17 (6.0)                  | 14 (6.1)                 | 3 (5.5)                   |          |
| Others                                | 3 (1.1)                   | 3 (1.3)                  | 0 (0)                     |          |
| <b>Co-morbidities</b>                 |                           |                          |                           |          |
| Obesity (BMI ≥ 30 kg/m <sup>2</sup> ) | 132 (46.6)                | 102 (44.7)               | 30 (54.5)                 | 0.191    |
| Current/Former smokers                | 109 (38.5)                | 88 (38.6)                | 21 (38.2)                 | 0.955    |
| Hypertension                          | 189 (66.8)                | 145 (63.6)               | 44 (80.0)                 | 0.020*   |
| Diabetes mellitus                     | 108 (38.2)                | 81 (35.5)                | 27 (49.1)                 | 0.063    |
| Hyperlipidemia                        | 121 (42.8)                | 94 (41.2)                | 27 (49.1)                 | 0.290    |
| Coronary artery disease               | 50 (17.7)                 | 40 (17.5)                | 10 (18.2)                 | 0.911    |
| Heart failure/cardiomyopathy          | 53 (18.7)                 | 40 (17.5)                | 13 (23.6)                 | 0.299    |
| Arrhythmia/conduction disorders       | 45 (15.9)                 | 36 (15.8)                | 9 (16.4)                  | 0.917    |
| Chronic kidney disease                | 66 (23.3)                 | 46 (20.2)                | 20 (36.4)                 | 0.011*   |
| End-stage kidney disease              | 13 (4.6)                  | 12 (5.3)                 | 1 (1.8)                   | 0.474    |
| Asthma/COPD                           | 73 (25.8)                 | 54 (23.7)                | 19 (34.5)                 | 0.098    |
| Cerebrovascular disease               | 40 (14.1)                 | 32 (14.0)                | 8 (14.5)                  | 0.922    |
| <b>Signs and symptoms</b>             |                           |                          |                           |          |
| Cough                                 | 185 (65.4)                | 149 (65.4)               | 36 (65.5)                 | 0.988    |
| Dyspnea                               | 203 (71.7)                | 158 (69.3)               | 45 (81.8)                 | 0.064    |
| Hypoxia (SpO <sub>2</sub> < 95%)      | 178 (62.9)                | 130 (57.0)               | 48 (87.3)                 | < 0.001* |
| Rhinorrhea                            | 29 (10.2)                 | 26 (11.4)                | 3 (5.5)                   | 0.226    |
| Fever/chills                          | 179 (63.3)                | 143 (62.7)               | 36 (65.5)                 | 0.706    |
| Chest pain                            | 35 (12.4)                 | 32 (14.0)                | 3 (5.5)                   | 0.109    |
| Headache                              | 28 (9.9)                  | 26 (11.4)                | 2 (3.6)                   | 0.128    |
| Gastrointestinal symptoms             | 79 (27.9)                 | 68 (29.8)                | 11 (20.0)                 | 0.145    |
| Asymptomatic                          | 8 (2.8)                   | 8 (3.5)                  | 0 (0)                     | 0.361    |
| Rales/crackles                        | 57 (20.1)                 | 40 (17.5)                | 17 (30.9)                 | 0.027*   |
| Rhonchi                               | 57 (20.1)                 | 45 (19.7)                | 12 (21.8)                 | 0.730    |
| Reduced breath sound                  | 63 (22.3)                 | 48 (21.1)                | 15 (27.3)                 | 0.320    |
| <b>Laboratory findings</b>            |                           |                          |                           |          |
| Leukopenia (WBC < 4,000 /uL)          | 56 (19.8)                 | 46 (20.2)                | 10 (18.2)                 | 0.739    |
| Leukocytosis (WBC > 10,000 /uL)       | 80 (28.3)                 | 53 (23.2)                | 27 (49.1)                 | < 0.001* |
| Lymphocytopenia (ALC < 1,000 /uL)     | 109 (38.7)                | 78 (34.2)                | 31 (57.4)                 | 0.002*   |
| Thrombocytopenia (< 140,000 /uL)      | 57 (20.1)                 | 41 (18.0)                | 16 (29.1)                 | 0.065    |
| Thrombocytosis (> 400,000 /uL)        | 31 (11.0)                 | 25 (11.0)                | 6 (10.9)                  | 0.991    |
| Respiratory acidosis                  | 43 (21.3)                 | 18 (11.8)                | 25 (50.0)                 | < 0.001* |
| Transaminitis (ALT > 3X UNL)          | 33 (12.4)                 | 21 (9.9)                 | 12 (21.8)                 | 0.017*   |
| Serum creatinine (mg/dL) on admission | 1.06 (0.72) <sup>‡</sup>  | 1.59 (1.88) <sup>†</sup> | 1.64 (1.15) <sup>†</sup>  | 0.808    |
| eGFR (mL/min/1.73m <sup>2</sup> )     | 64.2 (51.0) <sup>†</sup>  | 66.7 (35.5) <sup>†</sup> | 53.6 (25.3) <sup>†</sup>  | 0.002*   |
| Troponin I (> 0.03 ng/mL)             | 91 (39.1)                 | 61 (33.0)                | 30 (62.5)                 | < 0.001* |

|                                   |            |             |            |          |
|-----------------------------------|------------|-------------|------------|----------|
| <b>Inflammatory markers</b>       |            |             |            |          |
| D-dimer (> 500 ng/mL)             | 135 (80.4) | 101 (75.4)  | 34 (100)   | < 0.001* |
| Ferritin (> 336 ng/mL)            | 109 (65.3) | 78 (59.1)   | 31 (88.6)  | 0.001*   |
| Lactate dehydrogenase (> 200 U/L) | 108 (73.0) | 77 (67.0)   | 31 (93.9)  | 0.002*   |
| C-reactive protein (> 1 mg/dL)    | 152 (87.4) | 115 (83.9)  | 37 (100)   | 0.005*   |
| Procalcitonin (> 0.25 ng/mL)      | 73 (47.1)  | 50 (41.7)   | 23 (65.7)  | 0.012*   |
| ST-T change on EKG                | 84 (31.8)  | 63 (29.7)   | 21 (40.4)  | 0.139    |
| <b>Radiographic findings</b>      |            |             |            |          |
| Opacity/infiltrate                | 209 (73.9) | 162 (71.1)  | 47 (85.5)  | 0.029*   |
| Ground glass appearance           | 79 (27.9)  | 65 (28.5)   | 14 (25.5)  | 0.650    |
| Pleural effusion                  | 24 (8.5)   | 17 (7.5)    | 7 (12.7)   | 0.208    |
| Pulmonary congestion              | 30 (10.6)  | 23 (10.1)   | 7 (12.7)   | 0.568    |
| <b>Oxygen therapy/delivery</b>    |            |             |            |          |
| Nasal cannula                     | 207 (73.1) | 160 (70.2)  | 47 (85.5)  | 0.022*   |
| High-flow nasal cannula           | 36 (12.7)  | 18 (7.9)    | 18 (32.7)  | < 0.001* |
| NIPPV                             | 28 (9.9)   | 10 (4.4)    | 18 (32.7)  | < 0.001* |
| Mechanical ventilation            | 58 (20.5)  | 25 (11.0)   | 33 (60.0)  | < 0.001* |
| <b>Intervention</b>               |            |             |            |          |
| Intensive care unit               | 89 (31.4)  | 47 (20.6)   | 42 (76.4)  | < 0.001* |
| ECMO                              | 2 (0.7)    | 0 (0)       | 2 (3.6)    | 0.037*   |
| RRT                               | 16 (5.7)   | 3 (1.3)     | 13 (23.6)  | < 0.001* |
| Vasopressor                       | 53 (18.7)  | 19 (8.3)    | 34 (61.8)  | < 0.001* |
| Antibiotics                       | 220 (77.7) | 166 (72.8)  | 54 (98.2)  | < 0.001* |
| <b>Treatment</b>                  |            |             |            |          |
| Azithromycin                      | 182 (64.3) | 139 (61.0)  | 43 (78.2)  | 0.017*   |
| Hydroxychloroquine                | 67 (23.7)  | 45 (19.7)   | 22 (40.0)  | 0.002*   |
| Steroids                          | 46 (16.3)  | 26 (11.4)   | 20 (36.4)  | < 0.001* |
| Ascorbic acid                     | 57 (20.1)  | 38 (16.7)   | 19 (34.5)  | 0.003*   |
| Zinc                              | 54 (19.1)  | 33 (14.5)   | 21 (38.2)  | < 0.001* |
| Tocilizumab                       | 12 (4.2)   | 6 (2.6)     | 6 (10.9)   | 0.006*   |
| Convalescent plasma               | 36 (12.7)  | 19 (8.3)    | 17 (30.9)  | < 0.001* |
| Remdesivir                        | 25 (8.8)   | 20 (8.8)    | 5 (8.8)    | 0.940    |
| <b>Complications</b>              |            |             |            |          |
| Acute kidney injury               | 115 (40.6) | 75 (32.9)   | 40 (72.7)  | < 0.001* |
| ARDS                              | 53 (18.7)  | 17 (7.5)    | 36 (65.5)  | < 0.001* |
| Arrhythmias                       | 31 (11.0)  | 18 (7.9)    | 13 (23.6)  | 0.001*   |
| QT prolongation                   | 25 (8.8)   | 18 (7.9)    | 7 (12.7)   | 0.257    |
| Venous thromboembolism            | 10 (3.5)   | 8 (3.5)     | 2 (3.6)    | 1.000    |
| Arterial thrombosis               | 1 (0.4)    | 1 (0.4)     | 0 (0)      | 1.000    |
| Cerebrovascular event             | 3 (1.1)    | 3 (1.3)     | 0 (0)      | 1.000    |
| Myocardial infection              | 5 (1.8)    | 4 (1.8)     | 1 (1.8)    | 1.000    |
| Heart failure                     | 16 (5.7)   | 11 (4.8)    | 5 (9.1)    | 0.219    |
| Superimposed bacteremia           | 19 (6.7)   | 12 (5.3)    | 7 (12.7)   | 0.047*   |
| Hospital stay (day)               | 6.0 (7.0)‡ | 7.4 (7.53)† | 9.2 (7.7)† | 0.125    |
| <b>Outcome</b>                    |            |             |            |          |
| Recovery/discharge                | 223 (78.8) |             |            |          |
| Remained hospitalized             | 2 (0.7)    |             |            |          |
| Death                             | 55 (19.4)  |             |            |          |

618

619

ALC, absolute lymphocyte count; ALT, alanine transaminase; ARDS, acute respiratory distress syndrome; BMI, body mass index; COPD, chronic obstructive pulmonary disease; ECMO, extra-corporeal membrane oxygenation; eGFR, estimated glomerular filtration rate; EKG, electrocardiography; IQR, interquartile range; NIPPV, non-invasive positive pressure ventilation; RRT, renal replacement therapy; SD, standard deviation; SpO<sub>2</sub>, oxygen saturation; UNL, upper normal limit; WBC, white blood cell.

\*statistically significant peer review only - <http://bmjopen.bmj.com/site/about/guidelines.xhtml>

†mean (standard deviation)

‡median (IQR)

620

621

622 **Table 2.** Clinical risk factors for overall in-hospital mortality using univariate binary logistic regression analysis.

| Characteristics                                     | Odds ratio | 95% CI        | P-value  |
|-----------------------------------------------------|------------|---------------|----------|
| Age (per 1-year increment)                          | 1.051      | 1.028-1.075   | < 0.001* |
| Hypertension                                        | 2.288      | 1.121-4.673   | 0.024*   |
| Chronic kidney disease                              | 2.262      | 1.195-4.274   | 0.012*   |
| Hypoxia (SpO <sub>2</sub> < 95%)                    | 5.181      | 2.242-11.905  | < 0.001* |
| Rales/crackles                                      | 2.101      | 1.080-4.098   | 0.029*   |
| Leukocytosis (WBC > 10,000 /uL)                     | 3.185      | 1.727-5.882   | < 0.001* |
| Respiratory acidosis                                | 7.463      | 3.546-15.625  | < 0.001* |
| Transaminitis (ALT > 3X UNL)                        | 2.538      | 1.160-5.556   | 0.020*   |
| eGFR (per 1.0 mL/min/1.73m <sup>2</sup> increment)† | 0.988      | 0.980-0.997   | 0.011*   |
| D-dimer (> 500 ng/mL)‡                              | -          | -             | -        |
| Ferritin (> 336 ng/mL)                              | 5.376      | 1.789-16.129  | 0.003*   |
| Lactate dehydrogenase (> 200 U/L)                   | 7.634      | 1.739-33.333  | 0.007*   |
| C-reactive protein (> 1 mg/dL)‡                     | -          | -             | -        |
| Procalcitonin (> 0.25 ng/mL)                        | 2.681      | 1.222-5.882   | 0.014*   |
| Troponin I (> 0.03 ng/mL)                           | 3.390      | 1.751-6.536   | < 0.001* |
| Opacity/infiltrate on imaging                       | 2.392      | 1.073-5.348   | 0.033*   |
| Nasal cannula                                       | 2.494      | 1.120-5.556   | 0.025*   |
| High-flow nasal cannula                             | 5.682      | 2.703-11.905  | < 0.001* |
| NIPPV                                               | 10.638     | 4.545-25.000  | < 0.001* |
| Mechanical ventilation                              | 12.195     | 6.173-23.810  | < 0.001* |
| ICU admission/transfer                              | 12.500     | 6.173-25.000  | < 0.001* |
| ECMO‡                                               | -          | -             | -        |
| RRT                                                 | 23.256     | 6.329-83.333  | < 0.001* |
| Vasopressor                                         | 17.857     | 8.696-37.037  | < 0.001* |
| Antibiotics                                         | 20.000     | 2.732-142.857 | 0.003*   |
| Azithromycin                                        | 2.294      | 1.147-4.587   | 0.019*   |
| Hydroxychloroquine                                  | 2.710      | 1.443-5.102   | 0.002*   |
| Steroids                                            | 4.444      | 2.237-8.772   | < 0.001* |
| Ascorbic acid                                       | 2.639      | 1.370-5.076   | 0.004*   |
| Zinc                                                | 3.650      | 1.898-7.042   | < 0.001* |
| Tocilizumab                                         | 4.525      | 1.403-14.706  | 0.012*   |
| Convalescent plasma                                 | 4.921      | 2.348-10.314  | < 0.001* |
| Acute kidney injury                                 | 5.435      | 2.825-10.417  | < 0.001* |
| ARDS                                                | 23.256     | 11.236-50.000 | < 0.001* |
| Arrhythmia                                          | 3.610      | 1.645-7.937   | 0.001*   |
| Superimposed bacteremia                             | 2.625      | 0.982-6.993   | 0.054    |

ARDS, acute respiratory distress syndrome; BMI, body mass index; CI, confidence interval; ICU, intensive care unit; RRT, renal replacement therapy.

\*statistically significant

†on admission

‡analyses cannot be performed as at least one cell is zero

For peer review only - <http://bmjopen.bmj.com/site/about/guidelines.xhtml>

623

624

625

626

627

**Table 3.** Clinical predictors for overall in-hospital mortality using multivariate binary logistic regression analysis.

| Characteristics                                     | Statistics |               |          |
|-----------------------------------------------------|------------|---------------|----------|
|                                                     | Odds ratio | 95% CI        | P-value  |
| <b>Model 1</b>                                      |            |               |          |
| Age (per 1-year increment)                          | 1.075      | 1.045-1.105   | < 0.001* |
| Hypertension                                        | 1.264      | 0.572-2.793   | 0.562    |
| Chronic kidney disease                              | 1.232      | 0.590-2.571   | 0.578    |
| Hypoxia (SpO <sub>2</sub> < 95%)                    | 4.630      | 1.934-1.111   | 0.001*   |
| Rales/crackles                                      | 2.016      | 0.955-4.255   | 0.066    |
| Leukocytosis (WBC > 10,000 /uL)                     | 2.732      | 1.412-5.263   | 0.003*   |
| Transaminitis (ALT > 3X UNL)                        | 2.137      | 0.890-5.128   | 0.089    |
| eGFR (per 1.0 mL/min/1.73m <sup>2</sup> decrement)† | 1.002      | 0.990-1.013   | 0.795    |
| Ferritin (> 336 ng/mL)                              | 4.016      | 1.195-13.514  | 0.025*   |
| Lactate dehydrogenase (> 200 U/L)                   | 7.752      | 1.639-37.037  | 0.010*   |
| Procalcitonin (> 0.25 ng/mL)                        | 2.404      | 1.011-5.714   | 0.047*   |
| Troponin I (> 0.03 ng/mL)                           | 2.242      | 1.080-4.673   | 0.030*   |
| Opacity/infiltrate on imaging                       | 3.077      | 1.276-7.407   | 0.012*   |
| Nasal cannula                                       | 1.883      | 0.799-4.444   | 0.148    |
| High-flow nasal cannula                             | 4.608      | 2.053-10.309  | < 0.001* |
| NIPPV                                               | 7.246      | 2.899-18.182  | < 0.001* |
| Mechanical ventilation                              | 13.889     | 6.211-31.250  | < 0.001* |
| ICU admission/transfer                              | 13.699     | 6.135-30.303  | < 0.001* |
| RRT                                                 | 21.277     | 5.025-90.909  | < 0.001* |
| Vasopressor                                         | 22.222     | 9.434-52.632  | < 0.001* |
| Antibiotics                                         | 17.544     | 2.309-125.000 | 0.006*   |
| ARDS                                                | 23.810     | 10.204-55.556 | < 0.001* |
| Superimposed bacteremia                             | 2.041      | 0.645-6.452   | 0.224    |
| <b>Model 2</b>                                      |            |               |          |
| Azithromycin                                        | 1.916      | 0.788-4.651   | 0.152    |
| Hydroxychloroquine                                  | 1.057      | 0.467-2.392   | 0.894    |
| Ascorbic acid                                       | 1.008      | 0.440-2.313   | 0.985    |
| Zinc                                                | 1.517      | 0.651-3.546   | 0.334    |
| Tocilizumab                                         | 1.499      | 0.381-5.917   | 0.562    |
| Convalescent plasma                                 | 1.513      | 0.600-3.817   | 0.381    |
| <b>Model 3</b>                                      |            |               |          |
| Respiratory acidosis                                | 3.745      | 1.443-9.709   | 0.007*   |
| Steroids therapy                                    | 1.107      | 0.459-2.667   | 0.821    |



|                              |       |             |        |
|------------------------------|-------|-------------|--------|
| <b>Model 4</b>               |       |             |        |
| Acute kidney injury          | 2.268 | 1.025-5.025 | 0.043* |
| <b>Model 5</b>               |       |             |        |
| Arrhythmias as complications | 1.161 | 0.428-3.155 | 0.769  |

628

629 ARDS, acute respiratory distress syndrome; CAD, coronary artery disease; CKD, chronic kidney disease; CI, confidence interval; COPD, chronic obstructive pulmonary disease; eGFR, estimated glomerular filtration rate; ICU, intensive care unit; NIPPV, non-invasive positive pressure ventilation; RRT, renal replacement therapy.

630 \*statistically significant

Model 1 is adjusted for age, sex, ethnicity and obesity

631 Model 2 is adjusted for age, sex, ethnicity, obesity, need for oxygen therapy, and ICU admission

Model 3 is adjusted for age, sex, ethnicity, obesity, asthma/COPD, need for oxygen therapy, and ICU admission

Model 4 is adjusted for age, sex, ethnicity, obesity, CKD, need for oxygen therapy, and ICU admission

632 Model 5 is adjusted for age, sex, ethnicity, obesity, CAD, heart failure, history of arrhythmia/conduction disorder, and ICU admission

633

634

635

636

637

638

639

640

641

642

643

644

645

646

647

648

649

650

651 **Table 4.** Demographics and baseline characteristics of critically ill patients (n = 89).

| Characteristics         | All patients<br>(n = 89) | Survivors<br>(n = 47)    | Non-survivors<br>(n = 42) | P-value  |
|-------------------------|--------------------------|--------------------------|---------------------------|----------|
| Male                    | 61 (68.5)                | 30 (63.8)                | 31 (73.8)                 | 0.365    |
| Age (year)              | 66.0 (14.2) <sup>†</sup> | 69.1 (12.5) <sup>†</sup> | 63.3 (15.2) <sup>†</sup>  | 0.052    |
| SOFA score <sup>‡</sup> | 4.3 (2.0)                | 3.6 (1.7)                | 5.1 (1.9)                 | < 0.001* |
| <b>Ethnicity</b>        |                          |                          |                           |          |
| Caucasian               | 47 (52.8)                | 25 (53.2)                | 22 (52.4)                 | 0.685    |
| African-American        | 25 (28.1)                | 12 (25.5)                | 13 (31.0)                 |          |
| Hispanic/Latino         | 12 (13.5)                | 8 (17.0)                 | 4 (9.5)                   |          |
| Asian                   | 5 (5.6)                  | 2 (4.3)                  | 3 (7.1)                   |          |
| Others                  | -                        | -                        | -                         |          |
| <b>Treatment</b>        |                          |                          |                           |          |
| Azithromycin            | 69 (77.5)                | 34 (72.3)                | 35 (83.3)                 | 0.215    |
| Hydroxychloroquine      | 42 (47.2)                | 23 (48.9)                | 19 (45.2)                 | 0.727    |
| Steroids                | 39 (43.8)                | 19 (40.4)                | 20 (47.6)                 | 0.495    |
| Ascorbic acid           | 39 (43.8)                | 22 (46.8)                | 17 (40.5)                 | 0.548    |
| Zinc                    | 40 (44.9)                | 21 (44.7)                | 19 (45.2)                 | 0.958    |
| Tocilizumab             | 11 (12.4)                | 5 (10.6)                 | 6 (14.3)                  | 0.750    |
| Convalescent plasma     | 30 (33.7)                | 14 (29.8)                | 16 (38.1)                 | 0.408    |
| Remdesivir              | 11 (12.4)                | 6 (12.8)                 | 5 (11.9)                  | 1.000    |
| <b>Complications</b>    |                          |                          |                           |          |
| Acute kidney injury     | 56 (62.9)                | 22 (46.8)                | 34 (81.0)                 | 0.001*   |
| ARDS                    | 47 (52.8)                | 15 (31.9)                | 32 (76.2)                 | < 0.001* |
| Arrhythmias             | 21 (23.6)                | 10 (21.3)                | 11 (26.2)                 | 0.586    |
| QT prolongation         | 16 (18.0)                | 10 (21.3)                | 6 (14.3)                  | 0.391    |
| Venous thromboembolism  | 5 (5.6)                  | 3 (6.4)                  | 2 (4.8)                   | 1.000    |
| Hospital stay (day)     | 13.1 (9.6) <sup>†</sup>  | 10.4 (8.1) <sup>†</sup>  | 15.5 (10.3) <sup>†</sup>  | 0.125    |
| <b>Outcome</b>          |                          |                          |                           |          |
| Recovery/discharge      | 43 (48.3)                |                          |                           |          |
| Remained hospitalized   | 2 (2.2)                  |                          |                           |          |
| Death                   | 42 (47.2)                |                          |                           |          |

652

653 ARDS, acute respiratory distress syndrome; SOFA, Sequential Organ Failure Assessment

\*statistically significant

<sup>†</sup>mean (standard deviation)<sup>‡</sup>collected on the first day of ICU admission

1  
2  
3  
4  
5  
6  
7  
8  
9  
10  
11  
12  
13  
14  
15  
16  
17  
18  
19  
20  
21  
22  
23  
24  
25  
26  
27  
28  
29  
30  
31  
32  
33  
34  
35  
36  
37  
38  
39  
40  
41  
42  
43  
44  
45  
46  
47  
48  
49  
50  
51  
52  
53  
54  
55  
56  
57  
58  
59  
60

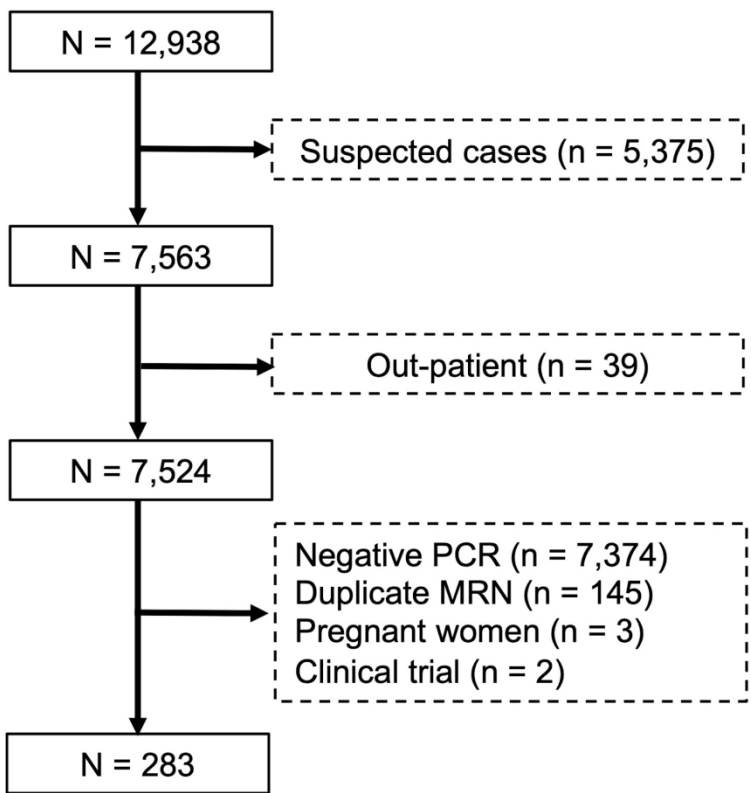

Figure 1. Flowchart of subject selection from UPMC Pinnacle COVID-19 registry from March 1 to May 31, 2020.

203x185mm (300 x 300 DPI)



Figure 2. Survival analysis by Kaplan-Meier curves. A) The cumulative survival declined with increasing length of hospital stay. The median survival time was 25 days with standard error (SE) of 7.0. B) ICU patients significantly lower survival probability with mean survival time of 22.3 days (SE 1.8) and 23.0 (SE 1.3) in ICU group vs. non-ICU group, respectively ( $p = 0.002$ ). C) The cumulative survival between ICU patients with and without acute respiratory distress syndrome ( $p = 0.302$ ). D) The cumulative survival between ICU patients with and without acute kidney injury ( $p = 0.504$ ).

254x228mm (300 x 300 DPI)

**Data collection (con't):**

The demographic data included age, sex, and ethnicity. Co-morbidities included current/prior history of smoking, obesity (BMI  $\geq 30$  kg/m<sup>2</sup>), hypertension, diabetes mellitus, hyperlipidemia, coronary artery disease, heart failure/cardiomyopathy, arrhythmia, chronic kidney disease, end-stage kidney disease (ESKD), asthma/chronic pulmonary obstructive disease, and cerebrovascular diseases.

Laboratory findings were recorded: leukocytosis (white blood cells count  $> 9,500/\mu\text{L}$ ), leukopenia (white blood cells count  $< 3,900/\mu\text{L}$ ), lymphocytopenia (absolute lymphocytes count  $< 600/\mu\text{L}$ ), thrombocytosis (platelets  $> 400,000/\mu\text{L}$ ), and thrombocytopenia (platelets  $< 140,000/\mu\text{L}$ ), respiratory acidosis (arterial pH  $< 7.35$  and arterial partial pressure of CO<sub>2</sub>  $> 45$  mmHg), transaminitis (alanine transaminase  $> 3$  times of upper normal limit). Serum creatinine (mg/dL) was measured by enzymatic assay. Elevation of serum D-dimer ( $> 500$  ng/mL), ferritin ( $> 336$  ng/mL) lactate dehydrogenase (LDH;  $> 200$  U/L), C-reactive protein ( $> 1$  mg/dL), procalcitonin ( $> 0.25$  ng/mL), and troponin I ( $> 0.03$  ng/mL; Backman Coulter DxI).

Please note that the cutoff values were determined by the National Reference Laboratory.

### **Rationale for multivariate analysis models**

Model 1 is adjusted for the baseline co-morbidities (age, sex, ethnicity, obesity). Some of these co-variables showed significant association with death on univariate analysis. Without these adjustments, the aforementioned co-variables will act as confounding factors.

Model 2 is adjusted for all factors in Model 1 plus “the need for oxygen therapy” because the interventions included in Model 2 (azithromycin, hydroxychloroquine, ascorbic acid, zinc, tocilizumab, convalescent plasma) were usually given in patients who required oxygen therapy. Thus, in this Model, “the need for oxygen therapy” was held constant allowing us to determine if these interventions were associated with death.

For Model 3, “respiratory acidosis, and steroids therapy” are usually seen in patients with asthma, COPD, critical illnesses and those who required oxygen therapy. These factors are potential confounders. Thus, we adjusted this Model for “asthma/COPD”; “the need for oxygen therapy”; and “ICU admission” to determine the true association between the variables and death.

In Model 4, “acute kidney injury” is defined by serum creatinine elevation. Patients with CKD would also have some elevation of serum creatinine levels. Thus, CKD would be a potential confounder. That is why we adjusted the Model for “CKD”; “need for oxygen therapy”; and “ICU admission” as all of these factors may contribute to death.

1  
2  
3 In Model 5, “arrhythmias” is a cardiac complication, hence we adjusted for every variable that  
4 could be the confounding factor, such as CAD, heart failure, history of arrhythmia/conduction  
5 disorder, and ICU admission.  
6  
7  
8  
9  
10  
11  
12  
13  
14  
15  
16  
17  
18  
19  
20  
21  
22  
23  
24  
25  
26  
27  
28  
29  
30  
31  
32  
33  
34  
35  
36  
37  
38  
39  
40  
41  
42  
43  
44  
45  
46  
47  
48  
49  
50  
51  
52  
53  
54  
55  
56  
57  
58  
59  
60

For peer review only

**STROBE 2007 (v4) Statement—Checklist of items that should be included in reports of cohort studies**

| Section/Topic             | Item # | Recommendation                                                                                                                                                                       | Reported on page #                              |
|---------------------------|--------|--------------------------------------------------------------------------------------------------------------------------------------------------------------------------------------|-------------------------------------------------|
| <b>Title and abstract</b> | 1      | (a) Indicate the study's design with a commonly used term in the title or the abstract                                                                                               | Page 2, Line 31-32                              |
|                           |        | (b) Provide in the abstract an informative and balanced summary of what was done and what was found                                                                                  | Page 2                                          |
| <b>Introduction</b>       |        |                                                                                                                                                                                      |                                                 |
| Background/rationale      | 2      | Explain the scientific background and rationale for the investigation being reported                                                                                                 | Page 4                                          |
| Objectives                | 3      | State specific objectives, including any prespecified hypotheses                                                                                                                     | Page 5, Line 129-131                            |
| <b>Methods</b>            |        |                                                                                                                                                                                      |                                                 |
| Study design              | 4      | Present key elements of study design early in the paper                                                                                                                              | Page 5, Line 134                                |
| Setting                   | 5      | Describe the setting, locations, and relevant dates, including periods of recruitment, exposure, follow-up, and data collection                                                      | Page 6, Line 159-166                            |
| Participants              | 6      | (a) Give the eligibility criteria, and the sources and methods of selection of participants. Describe methods of follow-up                                                           | Page 6, Line 159-166                            |
|                           |        | (b) For matched studies, give matching criteria and number of exposed and unexposed                                                                                                  | N/A                                             |
| Variables                 | 7      | Clearly define all outcomes, exposures, predictors, potential confounders, and effect modifiers. Give diagnostic criteria, if applicable                                             | Page 6, Line 168-183<br>Supplemental Document 1 |
| Data sources/measurement  | 8*     | For each variable of interest, give sources of data and details of methods of assessment (measurement). Describe comparability of assessment methods if there is more than one group | Supplemental Document 1                         |
| Bias                      | 9      | Describe any efforts to address potential sources of bias                                                                                                                            | Page 6, Line 168-169                            |
| Study size                | 10     | Explain how the study size was arrived at                                                                                                                                            | Page 6, Line 159-166                            |
| Quantitative variables    | 11     | Explain how quantitative variables were handled in the analyses. If applicable, describe which groupings were chosen and why                                                         | Page 7, Line 190-196                            |
| Statistical methods       | 12     | (a) Describe all statistical methods, including those used to control for confounding                                                                                                | Page 7-8, Line 189-221                          |
|                           |        | (b) Describe any methods used to examine subgroups and interactions                                                                                                                  | N/A                                             |
|                           |        | (c) Explain how missing data were addressed                                                                                                                                          | Page 7, Line 196                                |
|                           |        | (d) If applicable, explain how loss to follow-up was addressed                                                                                                                       | N/A                                             |



|                          |     |                                                                                                                                                                                                              |                          |
|--------------------------|-----|--------------------------------------------------------------------------------------------------------------------------------------------------------------------------------------------------------------|--------------------------|
|                          |     | (e) Describe any sensitivity analyses                                                                                                                                                                        | Page 8, Line 215-218     |
| <b>Results</b>           |     |                                                                                                                                                                                                              |                          |
| Participants             | 13* | (a) Report numbers of individuals at each stage of study—eg numbers potentially eligible, examined for eligibility, confirmed eligible, included in the study, completing follow-up, and analysed            | Page 8, Line 225-228     |
|                          |     | (b) Give reasons for non-participation at each stage                                                                                                                                                         | N/A                      |
|                          |     | (c) Consider use of a flow diagram                                                                                                                                                                           | Figure 1                 |
| Descriptive data         | 14* | (a) Give characteristics of study participants (eg demographic, clinical, social) and information on exposures and potential confounders                                                                     | Table 1                  |
|                          |     | (b) Indicate number of participants with missing data for each variable of interest                                                                                                                          | N/A                      |
|                          |     | (c) Summarise follow-up time (eg, average and total amount)                                                                                                                                                  | Table 1                  |
| Outcome data             | 15* | Report numbers of outcome events or summary measures over time                                                                                                                                               | Table 1                  |
| Main results             | 16  | (a) Give unadjusted estimates and, if applicable, confounder-adjusted estimates and their precision (eg, 95% confidence interval). Make clear which confounders were adjusted for and why they were included | Table 2-3                |
|                          |     | (b) Report category boundaries when continuous variables were categorized                                                                                                                                    | N/A                      |
|                          |     | (c) If relevant, consider translating estimates of relative risk into absolute risk for a meaningful time period                                                                                             | N/A                      |
| Other analyses           | 17  | Report other analyses done—eg analyses of subgroups and interactions, and sensitivity analyses                                                                                                               | Page 10-11, Line 271-302 |
| <b>Discussion</b>        |     |                                                                                                                                                                                                              |                          |
| Key results              | 18  | Summarise key results with reference to study objectives                                                                                                                                                     | Page 11-16, Line 309-467 |
| <b>Limitations</b>       |     |                                                                                                                                                                                                              |                          |
| Interpretation           | 20  | Give a cautious overall interpretation of results considering objectives, limitations, multiplicity of analyses, results from similar studies, and other relevant evidence                                   | Page 16-17, Line 468-491 |
| Generalisability         | 21  | Discuss the generalisability (external validity) of the study results                                                                                                                                        | Page 17, Line 490-491    |
| <b>Other information</b> |     |                                                                                                                                                                                                              |                          |
| Funding                  | 22  | Give the source of funding and the role of the funders for the present study and, if applicable, for the original study on which the present article is based                                                | Page 19, Line 538        |

\*Give information separately for cases and controls in case-control studies and, if applicable, for exposed and unexposed groups in cohort and cross-sectional studies.

1  
2  
3 **Note:** An Explanation and Elaboration article discusses each checklist item and gives methodological background and published examples of transparent reporting. The STROBE  
4 checklist is best used in conjunction with this article (freely available on the Web sites of PLoS Medicine at <http://www.plosmedicine.org/>, Annals of Internal Medicine at  
5 <http://www.annals.org/>, and Epidemiology at <http://www.epidem.com/>). Information on the STROBE Initiative is available at [www.strobe-statement.org](http://www.strobe-statement.org).  
6  
7  
8  
9  
10  
11  
12  
13  
14  
15  
16  
17  
18  
19  
20  
21  
22  
23  
24  
25  
26  
27  
28  
29  
30  
31  
32  
33  
34  
35  
36  
37  
38  
39  
40  
41  
42  
43  
44  
45  
46

For peer review only
