# Supplementary material for: Clinical characteristics of hospitalised patients with COVID-19 and the impact on mortality: a single-network, retrospective cohort study from Pennsylvania state
Source: PubMed Central journal article supplement — BMJ Open. 2021 Apr 8;11(4):e042549. doi: 10.1136/bmjopen-2020-042549 (PMC8039219; doi:10.1136/bmjopen-2020-042549), 2021-04-08
Supplement: bmjopen-2020-042549supp001.pdf [file bmjopen-2020-042549supp001.pdf]

**Data collection (con't):**

The demographic data included age, sex, and ethnicity. Co-morbidities included current/prior history of smoking, obesity (BMI  $\geq 30$  kg/m<sup>2</sup>), hypertension, diabetes mellitus, hyperlipidemia, coronary artery disease, heart failure/cardiomyopathy, arrhythmia, chronic kidney disease, end-stage kidney disease (ESKD), asthma/chronic pulmonary obstructive disease, and cerebrovascular diseases.

Laboratory findings were recorded: leukocytosis (white blood cells count  $> 9,500/\mu\text{L}$ ), leukopenia (white blood cells count  $< 3,900/\mu\text{L}$ ), lymphocytopenia (absolute lymphocytes count  $< 600/\mu\text{L}$ ), thrombocytosis (platelets  $> 400,000/\mu\text{L}$ ), and thrombocytopenia (platelets  $< 140,000/\mu\text{L}$ ), respiratory acidosis (arterial pH  $< 7.35$  and arterial partial pressure of CO<sub>2</sub>  $> 45$  mmHg), transaminitis (alanine transaminase  $> 3$  times of upper normal limit). Serum creatinine (mg/dL) was measured by enzymatic assay. Elevation of serum D-dimer ( $> 500$  ng/mL), ferritin ( $> 336$  ng/mL) lactate dehydrogenase (LDH;  $> 200$  U/L), C-reactive protein ( $> 1$  mg/dL), procalcitonin ( $> 0.25$  ng/mL), and troponin I ( $> 0.03$  ng/mL; Backman Coulter DxI).

Please note that the cutoff values were determined by the National Reference Laboratory.
